# Supplementary material
Source: publisher figshare collection journal article supplement (https://acs.figshare.com/ndownloader/files/11404769)
Supplement: Supplementary file 1 [file 11404769]

## Supporting Information - I

### Novel aminoquinoline derivatives significantly reduce parasite load in *Leishmania infantum* infected mice

Jelena Konstantinović<sup>¶</sup>, Milica Videnović<sup>#</sup>, Stefania Orsini<sup>†</sup>, Katarina Bogojević<sup>¶</sup>, Sarah D'Alessandro<sup>¥</sup>, Diletta Scaccabarozzi<sup>Ψ</sup>, Nataša Terzić Jovanović<sup>∇</sup>, Luigi Gradoni<sup>†</sup>, Nicoletta Basilico<sup>\*,¥</sup>, Bogdan A. Šolaja<sup>\*,¶,§</sup>

<sup>¶</sup>University of Belgrade, Faculty of Chemistry, Studentski trg 12-16, P.O. Box 51, 11158, Belgrade, Serbia

<sup>#</sup>Faculty of Chemistry Innovative Centre, Studentski trg 12-16, 11158 Belgrade, Serbia

<sup>∇</sup>University of Belgrade, Institute of Chemistry, Technology, and Metallurgy, Njegoševa 12, 11000 Belgrade, Serbia

<sup>§</sup>Serbian Academy of Sciences and Arts, Knez Mihailova 35, 11158 Belgrade, Serbia

<sup>¥</sup>Dipartimento di Scienze Biomediche, Chirurgiche e Odontoiatriche, Università degli Studi di Milano, Milan, Italy

<sup>Ψ</sup>Dipartimento di Scienze Farmacologiche e Biomolecolari, Università degli Studi di Milano, Milan, Italy

<sup>†</sup>Unit of Vector-borne Diseases, Istituto Superiore di Sanità, Rome, Italy

## Table of contents

|                                                                                                                                                        |                |
|--------------------------------------------------------------------------------------------------------------------------------------------------------|----------------|
| <b>Biological assays</b>                                                                                                                               | <b>S3-S5</b>   |
| <b>Methods for HPLC purity analyses</b>                                                                                                                | <b>S6-S8</b>   |
| <b>Synthetic procedures</b>                                                                                                                            | <b>S9-S26</b>  |
| <b><i>In vitro</i> activities against <i>L. infantum</i> and <i>L. tropica</i> promastigotes and cytotoxicity against THP-1 human cells (Table S1)</b> | <b>S27</b>     |
| <b><i>In vitro</i> activities against intramacrophage <i>L. infantum</i> amastigotes (Table S2)</b>                                                    | <b>S28</b>     |
| <b>Antileishmanial activity in <i>vivo</i> (Table S3, Table S4)</b>                                                                                    | <b>S29-S31</b> |
| <b>Nitric oxide and ROS production (Figure S1, Figure S2)</b>                                                                                          | <b>S31</b>     |

## Biological assays

***In vitro* antileishmanial activity – assay on promastigotes.** *Promastigote stage of L. infantum* strain MHOM/TN/80/IPT1 and *L. tropica* (MHOM/IT/2012/ISS3130) were cultured in Schneider's Drosophila medium (Lonza) supplemented with 10% heat-inactivated fetal calf serum (HyClone) at 22 °C. The complete medium used for antileishmanial activity assay was RPMI (EuroClone) supplemented with 10% heat-inactivated fetal calf serum (EuroClone), 20 mM Hepes, and 2 mM L-glutamine. To estimate the 50 % inhibitory concentration (IC<sub>50</sub>), the MTT (3-[4,5-dimethylthiazol-2-yl]-2,5-diphenyltetrazolium bromide) method was used with modifications.<sup>1</sup> Compounds were dissolved in DMSO and then diluted with medium to achieve the required concentrations. Drugs were placed in 96 wells round-bottom microplates and seven serial dilutions made. Amphotericin B was used as the reference anti-*Leishmania* drug. Parasites were diluted in complete medium to 5×10<sup>6</sup> parasites/mL and 100 µL of the suspension was seeded into the plates, incubated at 22 °C for 72 h and then 20 µL of MTT solution (5 mg/mL) was added into each well for 3 h. The plates were then centrifuged, the supernatants discarded and the resulting pellets dissolved in 100 µL of lysing buffer consisting of 20% (w/v) of a solution of SDS (Sigma), 40% of *N,N*-dimethylformamide (Merck) in H<sub>2</sub>O. The absorbance was measured spectrophotometrically at a test wavelength of 550 nm and a reference wavelength of 650 nm. The results are expressed as IC<sub>50</sub> which is the dose of compound necessary to inhibit parasite growth by 50%; each IC<sub>50</sub> value is the mean ± standard deviation of separate experiments performed in duplicate.

***In vitro* intracellular amastigote susceptibility assays.** THP-1 cells (human acute monocytic leukemia cell line) were maintained in RPMI supplemented with 10% FBS (EuroClone), 50 µM 2-mercaptoethanol, 20 mM Hepes, 2 mM glutamine, at 37 °C in 5% CO<sub>2</sub>. For *Leishmania* infections, THP-1 cells were plated at 5×10<sup>5</sup> cells/mL in 16-chamber Lab-Tek culture slides (Nunc) and treated with 0.1 µM phorbol myristate acetate (PMA, Sigma) for 48 h to achieve differentiation into macrophages. Cells were washed and infected with metacyclic *L. infantum* promastigotes at a macrophage/promastigote ratio of 1/10 for 24 h. Cell monolayers were then washed and incubated in the presence of test compounds for 72 h. Slides were fixed with methanol and stained with Giemsa. The results are expressed as the percentage of infected

macrophages in treated and non-treated cells determined by light microscopy and as  $IC_{50}$  which is the dose of compound necessary to inhibit parasite growth by 50%; each  $IC_{50}$  value is the mean  $\pm$  standard deviation of separate experiments performed in duplicate.

**Cytotoxicity against differentiated THP-1 cells.** THP-1 cells were plated at  $5 \times 10^5$  cells/mL in 96 wells flat bottom microplates and treated with 0.1  $\mu$ M PMA for 48 h to achieve differentiation into macrophages. Cells were then treated for 72 hours with serial dilutions of test compounds and cell viability evaluated using the MTT assay already described.<sup>2</sup> The results are expressed as  $IC_{50}$ , which is the dose of compound necessary to inhibit cell growth by 50%.

**Nitric oxide and ROS production.** Immortalized mouse C57Bl/6 bone marrow derived macrophages (BMDM) were generated as described<sup>3</sup> and maintained in Dulbecco's minimal essential medium, DMEM (Euroclone, Italy) supplemented with 10% FBS (EuroClone), 2 mM L-glutamine, 20 mM HEPES at 37 °C in 5% CO<sub>2</sub>. For NO and ROS production, BMDM were seeded (96-well plates;  $1 \times 10^5$  cells/well) and incubated overnight. Cells were then primed with 50 U/ml of Interferon-gamma (IFN- $\gamma$ ) for 2h, and treated for 24 hours with different concentrations of **15** (5, 2.5, 1.25  $\mu$ M) or **10** (2.5, 1.25, 0.625  $\mu$ M). LPS (100 ng/mL) was used as positive control. Cell viability was determined by MTT assay. Nitric oxide production was measured in cell supernatants by Griess reaction.<sup>4</sup> The Griess reagents consisted in a mixture of equal parts of Reagent A (1% [w/v] sulphanilamide), and Reagent B (0.1% [w/v] naphthylethylenediamine dihydrochloride, and 2.5% [w/v] phosphoric acid). Fifty microliters of supernatants were mixed with an equal volume of Griess mixture and the nitrite levels were quantified by extrapolation from NaNO<sub>2</sub> standard curve. Absorbance was measured at 540 nm using a microplate reader (Synergy 4 microplate reader, Biotek, GE). ROS production was measured using the H<sub>2</sub>DCFDA dye. After treatment of BMDM (as described above), the medium was discarded, the macrophages were washed with PBS, and incubated with H<sub>2</sub>DCFDA (20  $\mu$ M in PBS) for 30 min in the dark at 37 °C in 5% CO<sub>2</sub>. The supernatants were transferred into a flat-bottom black plate and fluorescence was measured spectrofluorometrically using an excitation wavelength of 485 nm and an emission wavelength of 528 nm by a Synergy 4, Biotek®. Statistical analyses were performed with GraphPad Prism 5 software by using 1-way ANOVA test followed by Bonferroni's post hoc test.

**Tolerability studies in mice.** Groups of four or five healthy female C57Bl/6 mice were treated per os (p.o.) or subcutaneous (s.c.) in a single dose with aminoquinolines suspended in 0.5% hydroxyethylcellulose-0.1% Tween 80 previously dissolved in DMSO (for p.o.) or dissolved in sunflower oil (for s.c.). Individual mouse behavior and appearance was monitored two times a day for 30 days. Compounds proved to be tolerable in mice if all mice survived 30 days after administration and showed normal appearance and behavior. The study followed the International Guiding Principles for biomedical research involving animals, and was reviewed by a local Ethics Committee and approved by the Veterinary Directorate at the Ministry of Agriculture and Environmental Protection of Serbia (decision no. 323-07-02444/2014-05/1).

**Antileishmanial activity *in vivo*.** A standard protocol using a short-term infection of Balb/c mice with *Leishmania infantum* was employed.<sup>5</sup> Briefly, a semi-purified suspension of  $2 \times 10^6$  *Leishmania infantum* amastigotes (WHO reference strain: MHOM/TN/1980/IPT-1), was inoculated *via* the tail vein in groups of Balb/c mice weighing 18-20 g. On day 7 after infection the increase in parasite load was monitored by killing one animal from the control group. Liver was weighed, from which imprints were made and parasites counted against 500 liver cell nuclei. Their numbers were expressed as arbitrary units, i.e. the number of parasites per liver cell nucleus multiplied by the weight of the organ in mg. The compounds were dissolved and administered per os (**15** in 0.1%Tween/0.5%HEC in water; **10** in water) or s.c. (**15** in sunflower oil; **10** in water), for 4 or 5 consecutive days from day 9 after infection. A group of mice was left untreated and served as control. On days 13 or 14, the parasite load of killed mice was assessed as described above, and the mean parasite count of each treated group was expressed as a percentage of the mean parasite count of the control group. The study followed the International Guiding Principles for biomedical research involving animals (European Directive 2010/63/UE), and it was reviewed by a local Ethics Committee. The study was approved by the Directorate of Animal Health and Veterinary Drugs at the Ministry of Health of Italy (authorization no. 120/2015-PR).

**Chemistry.** Melting points were determined on a Boetius PMHK apparatus and were not corrected. IR spectra were recorded on a Thermo-Scientific Nicolet 6700 FT-IR diamond crystal spectrophotometer.  $^1\text{H}$  and  $^{13}\text{C}$  NMR spectra were recorded on a Varian Gemini-200 spectrometer (at 200 and 50 MHz, respectively), and a Bruker Ultrashield Advance III spectrometer (at 500 and 125 MHz, respectively) in the indicated solvent (vide infra) using TMS as the internal standard. Chemical shifts are expressed in ppm ( $\delta$ ) values and coupling constants ( $J$ ) in Hz. ESI-MS (HRMS) spectra of the synthesized compounds were acquired on a Agilent Technologies 1200 Series instrument equipped with Zorbax Eclipse Plus C18 (100  $\times$  2.1 mm i.d. 1.8  $\mu\text{m}$ ) column and DAD detector (190-450 nm) in combination with a 6210 Time-of-Flight LC/MS instrument in positive and negative ion mode. The samples were dissolved in MeOH (HPLC grade). The selected values were as follows: capillary voltage 4 kV; gas temperature 350  $^{\circ}\text{C}$ ; drying gas 12 L  $\text{min}^{-1}$ ; nebulizer pressure 45 psig; fragmentator voltage: 70 V. Mass spectral analyses were done using electrospray ionization in positive ion mode on a Surveyor separations module coupled to a ThermoFinnigan TSQ AM triple quadrupole mass spectrometer. Gas chromatography tandem mass spectrometry (GC-MS) analyses were performed on an Agilent 7890A GC (Agilent) system equipped with a 5975C inert XL EI/CI MSD and a flame ionization detector (FID) connected by capillary flow technology through a 2-way splitter with make-up gas. An HP-5 MS capillary column (Agilent Technologies, 25 mm i.d., 30 m length, 0.25  $\mu\text{m}$  film thickness) was used. The flash chromatography was performed on Biotage SP1 system equipped with UV detector and FLASH 12+, FLASH 25+ or FLASH 40+ columns charged with KP-SIL (40 – 63  $\mu\text{m}$ , pore diameter 60  $\text{\AA}$ ), KP-C18-HS (40 – 63  $\mu\text{m}$ , pore diameter 90  $\text{\AA}$ ) or KP-NH (40 – 63  $\mu\text{m}$ , pore diameter 100  $\text{\AA}$ ) as an adsorbent. Elemental analyses were realized with an Elemental Vario EL III microanalyser. All tested compounds were fully characterized and their purity was >95% (as determined by HPLC).

#### **Methods for HPLC purity analyses**

Compounds were analyzed for purity (HPLC) using a Agilent 1200 HPLC system equipped with Quat Pump (G1311B), Injector (G1329B) 1260 ALS, TCC 1260 ( G1316A) and Detector 1260 DAD VL+ (G1315C). HPLC analysis was performed in two diverse systems for each compound.

**Method A:** Zorbax Eclipse Plus C18 2.1  $\times$  100 mm, 1.8 $\mu$ , S.N. USUXU04444 was used as the stationary phase. Eluent was made from the following solvents: 0.2% formic acid in water (A)

and methanol (B). The analysis were performed at the UV max of the compounds (at 254 nm for compounds **4**, **6** and **21**, 270 nm for compounds **3** and **5**, 290 nm for **22** and **23** and 330 nm for compounds **1**, **2**, **10**, **24** and **25**) to maximize selectivity. Compounds were dissolved in methanol, final concentrations were ~1 mg/mL. Flow rate was 0.2 mL/min.

Compounds **1-6** and **21** were eluted using gradient protocol: 0-1 min 95%A, 1-6 min 95%A→ 5%A, 6-11 min 5%A, 11-14 min 5%A→ 95%A, 14-20 min 95%A.

Compound **10** was eluted using gradient protocol: 0-1.5 min 95%A, 1.5-5 min 95%A→ 5%A, 5-16 min 5%A, 16-18 min 5%A→ 95%A, 18-20 min 95%A.

Compound **22** was eluted using gradient protocol: 0-1 min 95%A, 1-3 min 95%A→ 5%A, 3-7 min 5%A, 7-8 min 5%A→ 95%A, 8-9 min 95%A.

Compound **23** was eluted using gradient protocol: 0-2 min 95%A, 2-4 min 95%A→ 5%A, 4-10 min 5%A, 10-11 min 5%A→ 95%A, 11-12 min 95%A.

Compounds **24** and **25** were eluted using gradient protocol: 0-1 min 95%A, 1-2 min 95%A→ 5%A, 2-10 min 5%A, 10-11 min 5%A→ 95%A, 11-12 min 95%A.

**Method B:** Zorbax Eclipse Plus C18 2.1 x 100 mm, 1.8 $\mu$ , S.N. USUXU04444 was used as the stationary phase. Eluent was made from the following solvents: 0.2% formic acid in water (A) and acetonitrile (B). The analysis were performed at the UV max of the compounds (at 254 nm for compound **21**, 270 nm for compounds **3**, **4** and **6** and 330 nm for compounds **1**, **2**, **5**, **10**, **24** and **25**) to maximize selectivity. Compounds were dissolved in methanol, final concentrations were ~1 mg/mL. Flow rate was 0.2 mL/min.

Compounds **1-6** and **21** were eluted using gradient protocol: 0-1 min 95%A, 1-6 min 95%A→ 5%A, 6-11 min 5%A, 11-14 min 5%A→ 95%A, 14-20 min 95%A.

Compound **10** was eluted using gradient protocol: 0-1.5 min 95%A, 1.5-5 min 95%A→ 5%A, 5-16 min 5%A, 16-18 min 5%A→ 95%A, 18-20 min 95%A.

Compound **24** was eluted using gradient protocol: 0-1 min 95%A, 1-3 min 95%A→ 5%A, 3-8 min 5%A, 8-10 min 5%A→ 95%A, 10-11 min 95%A.

Compound **25** was eluted using gradient protocol: 0-1 min 95%A, 1-3 min 95%A→ 5%A, 3-8 min 5%A, 8-10 min 5%A→ 95%A.

**Method C:** Zorbax Eclipse Plus C18 4.6 x 150mm, 1.8 $\mu$ , S.N. USWKY01594 was used as the stationary phase. Eluent was made from the following solvents: 0.2% formic acid in water (A) and methanol (B). The analysis were performed at the UV max of the compounds (at 330 nm for

compound **15**) to maximize selectivity. Compounds were dissolved in methanol, final concentrations were ~1 mg/mL. Flow rate was 0.5 mL/min.

Compound **15** was eluted using gradient protocol: 0-1 min 95%A, 1-6 min 95%A→ 5%A, 6-11 min 5%A, 11-14 min 5%A→ 95%A, 14-16 min 95%A.

**Method D:** Poroshell 120 EC-C18, 4.6 x 50mm, 2.7 $\mu$ , S.N. USCFU07797 was used as the stationary phase. Eluent was made from the following solvents: 0.2% formic acid in water (A) and acetonitrile (B). The analysis were performed at the UV max of the compounds (at 254 nm for compound **15**) to maximize selectivity. Compounds were dissolved in methanol, final concentrations were ~1 mg/mL. Flow rate was 0.5 mL/min.

Compound **15** was eluted using gradient protocol: 0-1 min 95%A, 1-6 min 95%A→ 5%A, 6-11 min 5%A, 11-13 min 5%A→ 95%A, 13-17 min 95%A.

**Method E:** Poroshell 120 EC-C18, 4.6 x 50mm, 2.7 $\mu$ , S.N. USCFU07797 was used as the stationary phase. Eluent was made from the following solvents: 0.2% formic acid in water (A) and methanol (B). The analysis was performed at the UV max of the compounds (290 nm for compounds **22** and **23**) to maximize selectivity. Compound was dissolved in methanol, final concentration was ~1 mg/mL. Flow rate was 0.5 mL/min.

Compounds **22** and **23** were eluted using gradient protocol: 0-1 min 95%A, 1-1.5 min 95%A→ 5%A, 1.5-6min 5%A, 6-7 min 5%A→ 95%A, 7-8 min 95%A.



## Synthetic procedures

### **Procedure A: General procedure for nucleophilic substitution.<sup>6</sup>**

A solution of **31**<sup>7</sup> (1 equiv) in DCM was cooled to 0 °C, followed by addition of amine (1.5 equiv) and Et<sub>3</sub>N (1.5 equiv). The reaction mixture was stirred on ice bath for 15 minutes, warmed to r.t. and after another 15 minutes heated to reflux for 1h. The mixture was transferred to a separation funnel, water was added and desired product extracted with DCM. Combined organic layers were dried over anh. MgSO<sub>4</sub> and the solvent was removed under reduced pressure.

### **Procedure B: General procedure for reduction using tin(II)-chloride.**

Using slightly modified procedure from literature<sup>7</sup>, a mixture of 3-nitroquinoline derivative (1 equiv) and SnCl<sub>2</sub> (5 equiv) in EtOH was stirred at r.t. under Ar atmosphere for 2 h. Solvent was removed under reduced pressure, followed by addition of sat. NaHCO<sub>3</sub>. Crude product was extracted several times with EtOAc. Combined extracts were washed with brine, dried over anh. MgSO<sub>4</sub> and the solvent was evaporated under reduced pressure.

### **Procedure C: General procedure for Boc-protecting group removal with TFA.**

A solution of amine in TFA/DCM mixture (v:v; 1:10) was stirred at r.t. overnight. Solvents were evaporated under reduced pressure and the residue was dissolved in DCM. The organic layer was washed several times with 2.5M NaOH and finally with water, dried over anh. MgSO<sub>4</sub> and the solvent was removed under reduced pressure.

### **Procedure D: General procedure for reductive amination.**

Amine (1.2-1.5 equiv) and appropriate aldehyde (1 equiv) were dissolved in MeOH/DCM mixture (v:v; 2:1), glac. AcOH (1.5 equiv) was added, and the mixture was stirred under Ar atmosphere at r.t. After 3 h, NaBH<sub>4</sub> (6 equiv) was added, and stirring was continued for another 18 h. Solvent was removed under reduced pressure, and the residue was dissolved in DCM. The organic layer was washed with 2M aqueous NH<sub>3</sub> and extracted with DCM. The combined organic layers were washed with brine and dried over anh. Na<sub>2</sub>SO<sub>4</sub>. Finally, the solvent was evaporated under reduced pressure.

### **Procedure E: General procedure for Buchwald-Hartwig amination<sup>8</sup>**

A suspension of Pd(OAc)<sub>2</sub> (4.00 mol %) and SPhos (8.00 mol %) in dioxane was purged with Ar and stirred at r.t. After three minutes, solution of **45** (1 equiv) in dioxane, an appropriate amine (1.5 equiv) and K<sub>3</sub>PO<sub>4</sub> (2.5 equiv) were added. The mixture was heated at 85 °C for 24 h in a

sealed tube. After filtration the crude product was purified using column chromatography (dry flash, SiO<sub>2</sub>, eluent EtOAc/MeOH and flash, Biotage SP1, NH column, eluent EtOAc/MeOH).

*N*-(7-chloroquinolin-4-yl)propane-1,3-diamine (**AQ3**) and *N*-(quinolin-4-yl)butane-1,4-diamine (**AQ8**) were prepared according to known procedures.

#### ***tert*-Butyl (3-aminopropyl)carbamate (**S1**).**

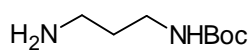 According to the procedure described in literature<sup>9</sup>, a solution of Boc<sub>2</sub>O (518.2 mg, 2.374 mmol) in DCM (10 mL) was added dropwise to a solution of propane-1,3-diamine (1 mL, 12 mmol) in DCM (40 mL). Reaction mixture was stirred at r.t. for 24h. Thereafter the solvent was removed under reduced pressure and the product was purified using column chromatography (dry-flash, SiO<sub>2</sub>, eluent DCM/MeOH gradient 6/4 → MeOH). Final product **S1** was obtained as a yellowish oil (228.0 mg, 55%). IR (ATR): 3350m, 2976s, 2934m, 1692s, 1525s, 1391m, 1366m, 1277m, 1252m, 1173s, 1060w, 871w, 780w cm<sup>-1</sup>. <sup>1</sup>H NMR (500 MHz, CDCl<sub>3</sub>, δ): 4.95 (bs, H-N), 3.24-3.20 (m, 2H, NH<sub>2</sub>CH<sub>2</sub>CH<sub>2</sub>CH<sub>2</sub>-), 2.79 (t, 2H, *J* = 6.7, NH<sub>2</sub>CH<sub>2</sub>-), 1.98 (bs, -NH<sub>2</sub>), 1.66-1.61 (m, 2H, NH<sub>2</sub>CH<sub>2</sub>CH<sub>2</sub>-), 1.44 (s, 9H, -NHCOOC(CH<sub>3</sub>)<sub>3</sub>). <sup>13</sup>C NMR (125 MHz, CDCl<sub>3</sub>, δ): 156.19, 79.11, 39.47, 38.30, 33.01, 28.39. HRMS: *m/z* 175.14407 corresponds to molecular formula C<sub>8</sub>H<sub>18</sub>N<sub>4</sub>O<sub>2</sub>H<sup>+</sup> (error in ppm -0.20).

#### **7-Chloroquinolin-4-amine (**S2**).**<sup>10</sup>

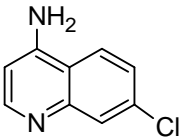 To the solution of 4,7-dichloroquinoline (676 mg, 3.41 mmol) in phenol (3.2 g, 34 mmol) stirring in two-necked flask at 110 °C, ammonium-carbonate (1.64 g, 17.1 mmol) was added in portions in a manner determined by intensity of foam developing in the flask. When addition was completed, the mixture was stirred at 165 °C for 3h. After cooling to r.t. diethylether was added. The solution was washed with 10% aqueous NaOH, extracted with diethylether and dried over anh. Na<sub>2</sub>SO<sub>4</sub>. The product was purified using column chromatography (dry-flash, SiO<sub>2</sub>, eluent DCM /MeOH). Final product **S2** was obtained as white solid (602 mg, 99%). M.p. = 137 – 139 °C. IR (KBr): 3459s, 3358s, 3241s, 2460m, 1698m, 1639s, 1612s, 1576s, 1508s, 1445s, 1378m, 1327m, 1284m, 1201m, 1130m, 1078m, 910m, 879m, 855m, 839m, 813m, 761m, 675w, 644w cm<sup>-1</sup>. <sup>1</sup>H NMR (500 MHz, CD<sub>3</sub>OD, δ): 8.26 (d, *J* = 5.5, H-C(2)), 8.05 (d, *J* = 8.9, H-C(5)), 7.77 (d, *J* = 2.1, H-C(8)), 7.37 (dd, *J*<sub>1</sub> = 9.0, *J*<sub>2</sub> = 2.2, H-

C(6)), 6.62 (d,  $J = 5.3$ , H-C(3)).  $^{13}\text{C}$  NMR (125 MHz,  $\text{CD}_3\text{OD}$ ,  $\delta$ ): 155.55, 152.11, 150.18, 136.66, 127.55, 125.93, 125.14, 118.48, 104.03. HRMS:  $m/z$  179.03700 corresponds to molecular formula  $\text{C}_9\text{H}_7\text{ClN}_2\text{H}^+$  (error in ppm -0.32).

***N'*-(7-Chloro-3-nitroquinolin-4-yl)-*N,N*-diethylpropane-1,3-diamine (1).**

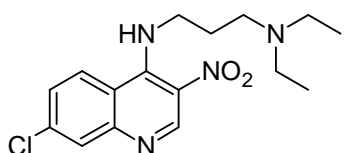

Compound **1** was synthesized from **31** (50.0 mg, 0.206 mmol) and 3-diethylamino-1-propylamine (0.05 mL, 0.32 mmol) by procedure

A. The product was purified using column chromatography (dry-flash,  $\text{SiO}_2$ , eluent MeOH, EtOAc/(MeOH/ $\text{NH}_3$ =9/1) gradient 9/1  $\rightarrow$  1/1 and flash chromatography, Biotage SP1, NH column, eluent EtOAc/Hex gradient 8/2). Final product **1** was obtained as a bright yellow solid (53.8 mg, 78%); softens at 50 °C. IR (ATR): 3122m, 2968s, 2876m, 2839m, 1566s, 1517s, 1448m, 1396m, 1342m, 1284m, 1254s, 1215m, 1191m, 1157m, 1116m, 1088w, 1021w, 980w, 958w, 924w, 892w, 819m, 774w, 719w, 596w  $\text{cm}^{-1}$ .  $^1\text{H}$  NMR (500 MHz,  $\text{CDCl}_3$ ,  $\delta$ ): 9.97 (s, H-N), 9.26 (s, H-C(2)), 8.19 (d,  $J = 8.9$ , H-C(5)), 7.95 (d,  $J = 2.3$ , H-C(8)), 7.40 (dd,  $J_1 = 9.0$ ,  $J_2 = 2.2$ , H-C(6)), 3.85 (q, 2H,  $J = 6.0$ ,  $\text{ArNHCH}_2-$ ), 2.66 (t, 2H,  $J = 6.2$ ,  $-\text{CH}_2\text{N}(\text{CH}_2\text{CH}_3)_2$ ), 2.59 (q, 4H,  $J = 7.1$ ,  $-\text{N}(\text{CH}_2\text{CH}_3)_2$ ), 1.94-1.89 (m, 2H,  $\text{ArNHCH}_2\text{CH}_2-$ ), 1.04 (t, 6H,  $J = 7.1$ ,  $-\text{N}(\text{CH}_2\text{CH}_3)_2$ ).  $^{13}\text{C}$  NMR (125 MHz,  $\text{CDCl}_3$ ,  $\delta$ ): 150.88, 149.73, 148.64, 138.32, 129.31, 127.38, 126.12, 125.82, 118.07, 50.72, 48.57, 46.98, 27.60, 11.31. HRMS:  $m/z$  337.14259 corresponds to molecular formula  $\text{C}_{16}\text{H}_{21}\text{ClN}_4\text{O}_2\text{H}^+$  (error in ppm 0.03);  $m/z$  169.07533 corresponds to molecular formula  $\text{C}_{16}\text{H}_{21}\text{ClN}_4\text{O}_2\text{H}_2^{2+}$  (error in ppm 2.39). HPLC purity ( $\lambda = 330$  nm) method A: RT 9.953 min, area 98.91%; method B: RT 8.598 min, area 95.44%.

***N*<sup>4</sup>-(7-Chloro-3-nitroquinolin-4-yl)-*N*<sup>1</sup>,*N*<sup>1</sup>-diethylpentane-1,4-diamine (2).**

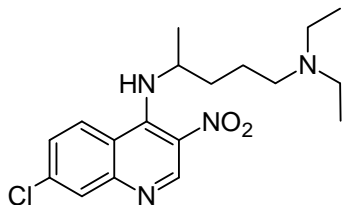

Compound **2** was synthesized from **31** (75 mg, 0.31 mmol) and 2-amino-5-diethylaminopentane (0.09 mL, 0.46 mmol) by procedure

A. The product was purified using column chromatography (dry-flash,  $\text{SiO}_2$ , eluent EtOAc/(MeOH/ $\text{NH}_3$ =9/1) gradient 8/2  $\rightarrow$  1/1 and flash chromatography, Biotage SP1, NH column, eluent EtOAc/MeOH gradient EtOAc  $\rightarrow$  97/3). Final product **2** was obtained as a bright yellow oil (88.0 mg, 78%). IR (ATR): 3272w, 2968m, 2930m, 2870w, 2804w, 1606m, 1578s, 1530m, 1450m, 1410m, 1382m, 1276m, 1249m, 1228m,

1189w, 1155m, 1110w, 950w, 883w, 822w, 778w  $\text{cm}^{-1}$ .  $^1\text{H}$  NMR (500 MHz,  $\text{CDCl}_3$ ,  $\delta$ ): 9.46 (d,  $J = 8.7$ , H-N), 9.35 (s, H-C(2)), 8.13 (d,  $J = 9.2$ , H-C(5)), 7.97 (d,  $J = 2.0$ , H-C(8)), 7.43 (dd,  $J_1 = 9.2$ ,  $J_2 = 2.3$ , H-C(6)), 4.4-4.32 (m, 1H,  $\text{ArNHCH}(\text{CH}_3)-$ ), 2.46 (q, 4H,  $J = 7.1$ ,  $-\text{N}(\text{CH}_2\text{CH}_3)_2$ ), 2.38 (t, 2H,  $J = 7.3$ ,  $-\text{CH}_2\text{N}(\text{CH}_2\text{CH}_3)_2$ ), 1.82-1.69 (m, 2H,  $\text{ArNHCH}(\text{CH}_3)\text{CH}_2-$ ), 1.58-1.46 (m, 5H,  $-\text{CH}_2\text{CH}_2\text{N}(\text{CH}_2\text{CH}_3)_2$ ,  $\text{ArNHCH}(\text{CH}_3)-$ ), 0.96 (t, 6H,  $J = 7.2$ ,  $-\text{N}(\text{CH}_2\text{CH}_3)_2$ ).  $^{13}\text{C}$  NMR (125 MHz,  $\text{CDCl}_3$ ,  $\delta$ ): 151.27, 150.38, 148.56, 138.71, 129.56, 127.75, 126.52, 126.19, 117.79, 54.63, 52.24, 46.74, 36.77, 23.73, 22.12, 11.51. HRMS:  $m/z$  365.17392 corresponds to molecular formula  $\text{C}_{18}\text{H}_{25}\text{ClN}_4\text{O}_2\text{H}^+$  (error in ppm 0.10);  $m/z$  183.09120 corresponds to molecular formula  $\text{C}_{18}\text{H}_{25}\text{ClN}_4\text{O}_2\text{H}_2^{2+}$  (error in ppm 3.42). HPLC purity ( $\lambda = 330$  nm) method A: RT 10.947 min, area 98.75%; method B: RT 8.985 min, area 97.28%.

**7-Chloro- $N^4$ -[3-(diethylamino)propyl]quinoline-3,4-diamine (3).**

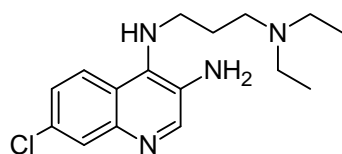

Compound **3** was prepared by procedure B using **1** (10.3 mg, 0.0306 mmol) and  $\text{SnCl}_2$  (29.0 mg, 0.153 mmol). The product was purified using column chromatography (dry-flash,  $\text{SiO}_2$ , eluent  $\text{DCM}/(\text{MeOH}/\text{NH}_3=9/1) = 9/1$ ). Final product **3** was obtained as a brown oil (3.8 mg, 40%). IR (ATR): 3313s, 2969s, 2930s, 2817m, 1596s, 1564s, 1468m, 1380s, 1344s, 1198m, 1166w, 1133m, 1075m, 988w, 897w, 815m, 767w, 673w, 548w, 436w  $\text{cm}^{-1}$ .  $^1\text{H}$  NMR (500 MHz,  $\text{CDCl}_3$ ,  $\delta$ ): 8.41 (s, H-C(2)), 7.92 (d,  $J = 2.1$ , H-C(8)), 7.85 (d,  $J = 9.2$ , H-C(5)), 7.35 (dd,  $J_1 = 9.2$ ,  $J_2 = 2.1$ , H-C(6)), 4.77 (bs, H-N), 4.08 (bs,  $-\text{NH}_2$ ), 3.38 (t, 2H,  $J = 6.0$ ,  $\text{ArNHCH}_2$ ), 2.73-2.68 (m, 6H,  $-\text{CH}_2\text{N}(\text{CH}_2\text{CH}_3)_2$ ,  $-\text{N}(\text{CH}_2\text{CH}_3)_2$ ), 1.90-1.85 (m, 2H,  $\text{ArNHCH}_2\text{CH}_2-$ ), 1.12 (t, 6H,  $J = 7.2$ ,  $-\text{N}(\text{CH}_2\text{CH}_3)_2$ ).  $^{13}\text{C}$  NMR (125 MHz,  $\text{CDCl}_3$ ,  $\delta$ ): 144.58, 144.24, 135.92, 131.03, 130.74, 128.58, 126.21, 122.17, 121.93, 51.14, 46.38, 45.27, 26.88, 10.66. HRMS:  $m/z$  307.16817 corresponds to molecular formula  $\text{C}_{16}\text{H}_{23}\text{ClN}_4\text{H}^+$  (error in ppm -0.76);  $m/z$  154.08791 corresponds to molecular formula  $\text{C}_{16}\text{H}_{23}\text{ClN}_4\text{H}_2^{2+}$  (error in ppm 0.48). HPLC purity ( $\lambda = 270$  nm) method A: RT 9.241 min, area 97.15%; method B: RT 7.692 min, area 95.76%.

**7-Chloro-*N*<sup>4</sup>-[4-(diethylamino)-1-methylbutyl]quinoline-3,4-diamine (4).**

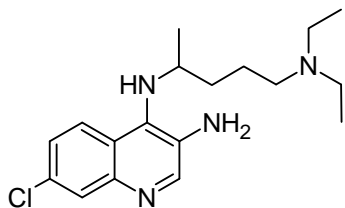

Compound **4** was prepared by procedure B using **2** (64.7 mg, 0.177 mmol) and SnCl<sub>2</sub> (168.1 mg, 0.8865 mmol). The product was purified using column chromatography (dry-flash, SiO<sub>2</sub>, eluent DCM/(MeOH/NH<sub>3</sub>=9/1) = 9/1). Final product **4** was obtained as a brown oil (35.8 mg, 60%). IR (ATR): 3323s, 2968s, 2816m, 1597s, 1564s, 1488m, 1378s, 1347s, 1196w, 1131m, 984w, 900w, 876w, 820m, 767m, 548w, 429w cm<sup>-1</sup>. <sup>1</sup>H NMR (500 MHz, CDCl<sub>3</sub>, δ): 8.45 (s, H-C(2)), 7.94 (d, *J* = 2.3, H-C(8)), 7.73 (d, *J* = 8.9, H-C(5)), 7.37 (dd, *J*<sub>1</sub> = 8.9, *J*<sub>2</sub> = 2.3, H-C(6)), 3.78 (bs, -NH<sub>2</sub> exchangeable with D<sub>2</sub>O), 3.56 (bs, H-N exchangeable with D<sub>2</sub>O), 2.57-2.37 (m, 7H, ArNHCH(CH<sub>3</sub>)-, -CH<sub>2</sub>N(CH<sub>2</sub>CH<sub>3</sub>)<sub>2</sub>, -N(CH<sub>2</sub>CH<sub>3</sub>)<sub>2</sub>), 1.68-1.49 (m, 4H, ArNHCH(CH<sub>3</sub>)CH<sub>2</sub>-, ArNHCH(CH<sub>3</sub>)CH<sub>2</sub>CH<sub>2</sub>-), 1.14 (d, 3H, *J* = 6.2, ArNHCH(CH<sub>3</sub>)-), 1.00 (t, 6H, *J* = 7.1, -N(CH<sub>2</sub>CH<sub>3</sub>)<sub>2</sub>). <sup>13</sup>C NMR (125 MHz, CDCl<sub>3</sub>, δ): 144.64, 144.42, 134.89, 131.52, 131.18, 128.75, 126.56, 122.89, 121.77, 52.90, 51.18, 46.87, 36.42, 23.97, 21.94, 11.47. HRMS: *m/z* 335.19970 corresponds to molecular formula C<sub>18</sub>H<sub>27</sub>ClN<sub>4</sub>H<sup>+</sup> (error in ppm 0.00); *m/z* 168.10399 corresponds to molecular formula C<sub>18</sub>H<sub>27</sub>ClN<sub>4</sub>H<sub>2</sub><sup>2+</sup> (error in ppm 2.97). HPLC purity method A (λ = 254 nm): RT 8.866 min, area 95.57%; method B (λ = 270 nm): RT 7.883 min, area 95.56%.

***N*-(1-adamantylmethyl)-*N*'-(7-chloro-3-nitroquinolin-4-yl)propane-1,3-diamine (5).**

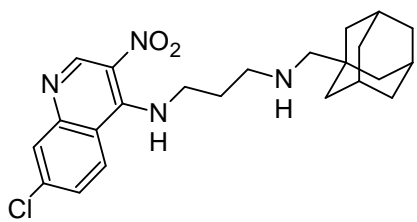

A solution of **33** (62.0 mg, 0.279 mmol) in DCM (3 mL) was cooled to 0 °C. Then, **31** (45.2 mg, 0.186 mmol) was added and stirring continued at same temperature for 15 min. Mixture was allowed to warm to r.t. and after another 15 minutes heated to reflux for 2h. Water was added and product extracted several times with DCM. Combined organic layers were dried over anh. NaSO<sub>4</sub> and the solvent was evaporated under reduced pressure. The product was purified using column chromatography (dry-flash, SiO<sub>2</sub>, eluent EtOAc → EtOAc/MeOH = 1/1 and flash chromatography, Biotage SP1, NH column, eluent EtOAc/Hex gradient 6/4 → 8/2). Final product **5** was obtained as a bright yellow oil (57.5 mg, 72%). IR (ATR): 3334w, 3246w, 2901s, 2844s, 1582s, 1530m, 1449m, 1416m, 1342m, 1279m, 1248m, 1218m, 1187m, 1155m, 1118m, 952w, 899w, 826w, 775w, 704w, 626w cm<sup>-1</sup>. <sup>1</sup>H NMR (500 MHz, CDCl<sub>3</sub>, δ): 9.74 (bs, H-N

exchangeable with D<sub>2</sub>O), 9.32 (s, H-C(2)), 8.26 (d,  $J = 9.2$ , H-C(5)), 7.96 (d,  $J = 2.1$ , H-C(8)), 7.41 (dd,  $J_1 = 9.0$ ,  $J_2 = 2.2$ , H-C(6)), 3.98-3.95 (m, 2H, ArNHCH<sub>2</sub>-), 2.80 (t, 2H,  $J = 6.3$ , -CH<sub>2</sub>NHCH<sub>2</sub>Ad), 2.24 (s, 2H, -CH<sub>2</sub>Ad), 1.97-1.92 (m, 5H, ArNHCH<sub>2</sub>CH<sub>2</sub>-, -Ad), 1.72-1.70 (m, 3H, -Ad), 1.63-1.60 (m, 3H, -Ad), 1.48 (d, 6H,  $J = 2.1$ , -Ad). <sup>13</sup>C NMR (125 MHz, CDCl<sub>3</sub>, δ): 151.20, 150.38, 148.63, 138.59, 129.39, 127.96, 126.14, 125.90, 118.00, 62.96, 48.14, 47.89, 40.86, 37.16, 33.47, 30.73, 28.41. HRMS:  $m/z$  429.20526 corresponds to molecular formula C<sub>23</sub>H<sub>29</sub>ClN<sub>4</sub>O<sub>2</sub>H<sup>+</sup> (error in ppm 0.20);  $m/z$  215.10664 corresponds to molecular formula C<sub>23</sub>H<sub>29</sub>ClN<sub>4</sub>O<sub>2</sub>H<sub>2</sub><sup>2+</sup> (error in ppm 1.92). HPLC purity method A ( $\lambda = 270$  nm): RT 11.811 min, area 95.51%; method B ( $\lambda = 330$  nm): RT 10.885 min, area 97.86%.

***N*<sup>4</sup>-{3-[(1-adamantylmethyl)amino]propyl}-7-chloroquinoline-3,4-diamine (6).**

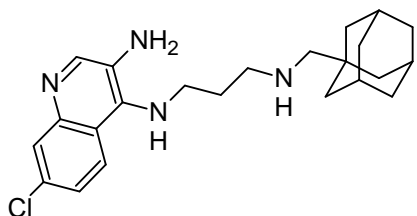

Compound **6** was synthesized by procedure B using **5** (36.7 mg, 0.086 mmol) and SnCl<sub>2</sub> (81.2 mg, 0.428 mmol). The product was purified using column chromatography (dry-flash, SiO<sub>2</sub>, eluent DCM/(MeOH/NH<sub>3</sub>=9/1) = 9/1). Final product **6** was obtained as a yellowish foam (24.2 mg, 71%);

softens at 30-32 °C. IR (ATR): 3312m, 2901s, 2845s, 1597m, 1564m, 1453m, 1344m, 1198w, 1119w, 897w, 814w, 734w, 548w cm<sup>-1</sup>. <sup>1</sup>H NMR (500 MHz, CDCl<sub>3</sub>, δ): 8.43 (s, H-C(2)), 7.93 (d,  $J = 2.1$ , H-C(8)), 7.84 (d,  $J = 9.2$ , H-C(5)), 7.34 (dd,  $J_1 = 9.2$ ,  $J_2 = 2.1$ , H-C(6)), 4.03 (bs, H-N exchangeable with D<sub>2</sub>O), 3.33 (t, 2H,  $J = 6.1$ , ArNHCH<sub>2</sub>-), 2.86 (t, 2H,  $J = 6.0$ , -CH<sub>2</sub>NHCH<sub>2</sub>Ad), 2.32, (s, 2H, -CH<sub>2</sub>Ad), 1.98 (bs, 3H, -Ad), 1.86-1.81 (m, 2H, ArNHCH<sub>2</sub>CH<sub>2</sub>-), 1.74-1.72 (m, 3H, -Ad), 1.66-1.63 (m, 3H, -Ad), 1.56 (d, 6H,  $J = 2.4$ , -Ad). <sup>13</sup>C NMR (125 MHz, CDCl<sub>3</sub>, δ): 144.54, 144.30, 135.88, 131.32, 131.01, 128.63, 126.37, 122.34, 122.11, 63.53, 49.65, 46.01, 41.09, 37.15, 33.32, 29.84, 28.40. HRMS:  $m/z$  399.22992 corresponds to molecular formula C<sub>23</sub>H<sub>31</sub>ClN<sub>4</sub>H<sup>+</sup> (error in ppm - 2.71);  $m/z$  200.11926 corresponds to molecular formula C<sub>23</sub>H<sub>31</sub>ClN<sub>4</sub>H<sub>2</sub><sup>2+</sup> (error in ppm 0.62). HPLC purity method A ( $\lambda = 254$  nm): RT 10.495 min, area 96.03%; method B ( $\lambda = 270$  nm): RT 9.666 min, area 98.63%.

**4-((3-[4-(3-([2-(1-adamantyl)ethyl]ammonio)propyl)piperazinediium-1-yl]propyl)amino)-7-chloroquinolinium tetrachloride (10).**

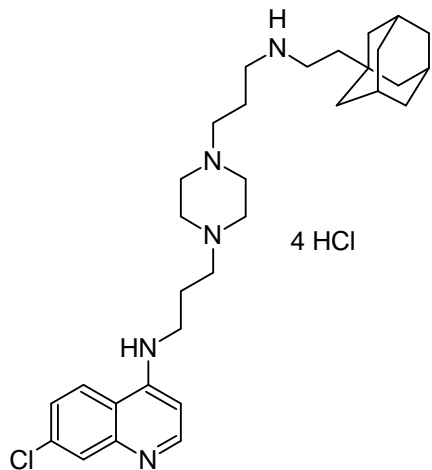

Amine **38** (50 mg, 0.098 mmol) was suspended in 0.5 mL EtOH, followed by addition of EtOH/HCl solution (2 mL, 25%) and the reaction mixture was vigorously stirred 24h at r.t. Formed solid was filtered and washed well with 96% EtOH (5 mL) and Et<sub>2</sub>O (5 mL). Upon drying at r.t. under reduced pressure desired salt was obtained (55 mg, 85%). M.p. > 280 °C. IR (ATR): 3383s, 3107w, 2902s, 2846m, 2657w, 2516w, 2437w, 2367w, 2325w, 2191w, 2121w, 2029w, 2006w, 1988w, 1965w, 1922w, 1615s, 1451s, 1362m, 1246w, 1216m, 1170w, 1141w, 1097w, 1052w, 1022w, 954m, 905m, 815m, 766m, 656w, 602w cm<sup>-1</sup>. <sup>1</sup>H NMR (500 MHz, D<sub>2</sub>O): 8.36 (d, 1H, *J* = 7.0 Hz, H-C(2)), 8.20 (d, 1H, *J* = 9.3 Hz, H-C(5)), 7.90 (d, 1H, *J* = 1.6 Hz, H-C(8)), 7.69 (dd, 1H, *J* = 1.9 Hz, *J* = 9.0 Hz, H-C(6)), 6.87 (d, 1H, *J* = 7.0 Hz, H-C(3)), 3.80-3.70 (m, 2H, ArNHCH<sub>2</sub>-), 3.70-3.55 (m, 8H, -NH<sup>+</sup>(CH<sub>2</sub>CH<sub>2</sub>)<sub>2</sub>NH<sup>+</sup>-), 3.50-3.40 (m, 2H, ArNHCH<sub>2</sub>CH<sub>2</sub>CH<sub>2</sub>NH<sup>+</sup>(CH<sub>2</sub>CH<sub>2</sub>)<sub>2</sub>NH<sup>+</sup>-), 3.35-3.25 (m, 2H, -NH(CH<sub>2</sub>CH<sub>2</sub>)<sub>2</sub>NH<sup>+</sup>CH<sub>2</sub>CH<sub>2</sub>CH<sub>2</sub>NH<sub>2</sub><sup>+</sup>CH<sub>2</sub>CH<sub>2</sub>Ad), 3.20-3.05 (m, 4H, -CH<sub>2</sub>NH<sub>2</sub><sup>+</sup>CH<sub>2</sub>CH<sub>2</sub>Ad, -CH<sub>2</sub>CH<sub>2</sub>Ad), 2.35-2.25 (m, 2H, ArNHCH<sub>2</sub>CH<sub>2</sub>-), 2.20-2.10 (m, 2H, -CH<sub>2</sub>CH<sub>2</sub>NH<sub>2</sub><sup>+</sup>CH<sub>2</sub>CH<sub>2</sub>Ad), 2.00-1.90 (m, 3H, -Ad), 1.80-1.60 (m, 6H, -Ad), 1.60-1.50 (m, 6H, -Ad), 1.50-1.40 (m, 2H, -CH<sub>2</sub>Ad). <sup>13</sup>C NMR (125 MHz, D<sub>2</sub>O): 156.11; 142.34; 139.40; 138.06; 127.56; 124.02; 119.16; 115.34; 98.32; 54.28; 53.53; 49.25; 49.06; 44.20; 43.56; 41.34; 40.02; 39.37; 36.26; 31.06; 28.14, 22.50, 21.01. HRMS: *m/z* 524.35077 corresponds to molecular formula C<sub>31</sub>H<sub>46</sub>ClN<sub>5</sub>H<sup>+</sup> (error in ppm -1.30). HPLC purity (λ=330 nm): method A: RT 9.973, area 98.31%; method B: RT 8.296, area 95.32%. Anal. (C<sub>31</sub>H<sub>46</sub>ClN<sub>5</sub> × 4HCl × 3.5H<sub>2</sub>O) Calcd: C, 50.79; H, 7.84; N, 9.55. Found: C, 50.89; H, 7.80; N, 9.62.

***N*-(7-chloroquinolin-4-yl)-*N'*-[4-(5-fluoro-1-benzothiophene-3-yl)benzyl]propane-1,3-diamine (**15**).**

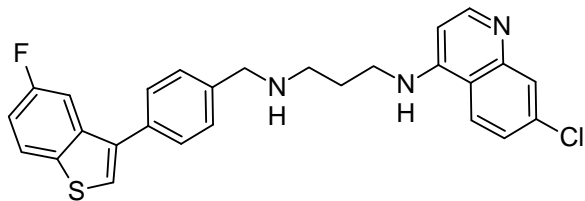

Compound **15** was prepared by procedure D, using aldehyde **39**<sup>11</sup> (118 mg, 0.460 mmol), amine **AQ3** (162.8 mg, 0.6906 mmol), glac. AcOH (40  $\mu$ L, 0.7 mmol), NaBH<sub>4</sub> (104.5 mg, 2.762 mmol) and MeOH/ DCM (18 mL, 2:1,

v/v). The product was purified using column chromatography (flash, Biotage SP1, NH column, eluent hexane/EtOAc gradient 2/8  $\rightarrow$  EtOAc, EtOAc/MeOH gradient 95/5  $\rightarrow$  1/1, MeOH; flash, Biotage SP1, SiO<sub>2</sub> column, eluent DCM /MeOH+NH<sub>3</sub> (9/1) gradient 95/5  $\rightarrow$  3/7). Final product **15** was obtained as a pale yellow foam (156.5 mg, 71%). M.p. = 39 – 40 °C. IR (ATR): 3239w, 3062w, 2935w, 2844w, 1583s, 1537m, 1492w, 1437m, 1368w, 1332w, 1282w, 1251w, 1197w, 1138w, 1114w, 883w, 853w, 806m, 784w, 650w cm<sup>-1</sup>. <sup>1</sup>H NMR (500MHz, CDCl<sub>3</sub>): 8.50 (d, *J* = 5.3, H-C(2')), 7.92-7.90 (m, H-C(8')), 7.84 (dd, *J*<sub>1</sub> = 4.8, *J*<sub>2</sub> = 8.9, H-C(7)), 7.59-7.53 (m, 5H, 2H-Ar, H-C(4), H-C(5')) and H-N exchangeable with D<sub>2</sub>O), 7.50 (s, H-C(2)), 7.48-7.44 (m, 2H-Ar), 7.19-7.11 (m, 2H, H-C(6) and H-C(6')), 6.32 (d, *J* = 5.2, H-C(3')), 3.92 (s, 2H, ArCH<sub>2</sub>NH-), 3.45-3.40 (m, 2H, ArNHCH<sub>2</sub>-), 3.05-3.01 (m, 2H, ArCH<sub>2</sub>NHCH<sub>2</sub>-), 2.02-1.95 (m, 2H ArCH<sub>2</sub>NHCH<sub>2</sub>CH<sub>2</sub>-), 1.86 (bs, H-N exchangeable with D<sub>2</sub>O). <sup>13</sup>C NMR (125 MHz, CDCl<sub>3</sub>): 161.13 (d, *J* = 240.7), 152.13, 150.40, 149.15, 139.14, 138.98, 137.37 (d, *J* = 4.7), 136.03, 134.70, 134.58, 128.83, 128.74, 128.53, 125.86, 124.79, 124.05 (d, *J* = 8.5), 122.04, 117.50, 113.40 (d, *J* = 25.6), 108.45 (d, *J* = 23.7), 98.32, 54.01, 49.32, 43.97, 27.45. HRMS: *m/z* 476.13504 corresponds to molecular formula C<sub>27</sub>H<sub>23</sub>ClN<sub>3</sub>SFH<sup>+</sup> (error in ppm -1.60), *m/z* 238.57136 corresponds to molecular formula C<sub>27</sub>H<sub>23</sub>ClN<sub>3</sub>SFH<sub>2</sub><sup>2+</sup> (error in ppm -0.75). HPLC purity: method C ( $\lambda$  = 330 nm): RT 9.741, area 96.57%; method D ( $\lambda$  = 254 nm): RT 5.816, area 95.63%.

***N*-[3-(5-fluoro-1-benzothien-3-yl)prop-2-yn-1-yl]-*N'*-quinolin-4-ylbutane-1,4-diamine (**21**).**

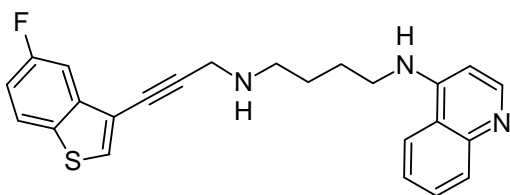

Solution of **40** (11.7 mg, 0.0507 mmol) in DMF (0.1 mL), PdCl<sub>2</sub>(PPh<sub>3</sub>)<sub>2</sub> (2.1 mg, 6.0 mol%), PPh<sub>3</sub> (2.6 mg, 20 mol%), solution of **41** (10.7 mg, 0.0422 mmol) in DMF (0.1 mL), CuI (0.6 mg, 6 mol%) and



Et<sub>2</sub>NH (78  $\mu$ L, 0.71 mmol) were added to a dry microwave tube (0.2-0.5 mL) under Ar atmosphere. The mixture was heated in microwave reactor (*Biotage Initiator 2.5 apparatus*) at 120 °C for 25 minutes. After cooling to r.t. the reaction mixture was transferred to the separation funnel and DCM was added. Organic layer was washed with brine (with addition of 1 drop of aqueous NH<sub>3</sub>) and dried over anh. Na<sub>2</sub>SO<sub>4</sub>. Crude product was purified using column chromatography (flash, Biotage SP, NH column, 12+M, eluent hexane/EtOAc gradient 2/8  $\rightarrow$  EtOAc, EtOAc/MeOH gradient 9/1  $\rightarrow$  1/1). Final product **21** was obtained as yellow oil (5.4 mg, 27%). IR (ATR): 3440w, 3250m, 3067m, 2930m, 2858m, 1582s, 1542m, 1442m, 1396w, 1374w, 1340m, 1298w, 1248w, 1196w, 1129w, 1100w, 1036w, 947w, 874w, 808w, 764m, 736w, 650w cm<sup>-1</sup>. <sup>1</sup>H NMR (200 MHz, CDCl<sub>3</sub>,  $\delta$ ): 8.53 (d,  $J$  = 5.6, H-C(2')), 8.01-7.93 (m, H-C(8')), 7.83-7.71 (m, 2H, H-C(5') and H-C(7')), 7.70-7.50 (m, 3H, H-C(7'), H-C(4) and H-C(2)), 7.45-7.34 (m, H-C(6')), 7.21-7.08 (m, H-C(6)), 6.40 (d,  $J$  = 5.6, H-C(3')), 5.72 (bs,  $H$ -N), 3.78 (s, 2H, -CH<sub>2</sub>C $\equiv$ C-Ar), 3.41-3.29 (m, 2H, ArNHCH<sub>2</sub>-), 2.98-2.87 (m, 2H, ArNH(CH<sub>2</sub>)<sub>3</sub>CH<sub>2</sub>-), 2.01-1.68 (m, 5H, ArNHCH<sub>2</sub>CH<sub>2</sub>CH<sub>2</sub>- and  $H$ -N). <sup>13</sup>C NMR (125 MHz, CDCl<sub>3</sub>,  $\delta$ ): 161.21 (d,  $J$  = 241.9), 150.66, 150.04, 147.99, 134.12, 131.93, 129.50, 129.05, 124.53, 123.82 (d,  $J$  = 9.0), 119.62, 118.74, 117.95, 113.99 (d,  $J$  = 25.3), 111.78, 108.52 (d,  $J$  = 23.5), 98.55, 90.30, 76.47, 48.12, 43.18, 39.11, 27.57, 26.43. HRMS:  $m/z$  404.15750 corresponds to molecular formula C<sub>24</sub>H<sub>22</sub>FN<sub>3</sub>SH<sup>+</sup> (error in ppm -4.00). HPLC purity ( $\lambda$  = 254 nm): method A: RT 10.106, area 96.11%; method B: RT 8.432, area 95.69%.

***N*<sup>1</sup>,*N*<sup>1</sup>-diethyl-*N*<sup>3</sup>-(5,6,7,8-tetrahydroquinolin-4-yl)propane-1,3-diamine (**22**).**

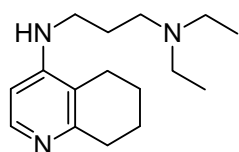

Compound **22** was prepared by procedure E, using Pd(OAc)<sub>2</sub> (1.4 mg, 0.0064 mmol), SPhos (5.2 mg, 0.013 mmol), **45** (26.8 mg, 0.159 mmol), *N,N*-diethylpropane-1,3-diamine (38  $\mu$ L, 0.24 mmol), K<sub>3</sub>PO<sub>4</sub> (84.6 mg, 0.398 mmol) and dioxane (1.3 mL). Final product **22** was obtained as colorless oil (18 mg, 43 %). IR (ATR): 3266w, 2968m, 2933m, 2873m, 2831m, 1591s, 1518m, 1452m, 1375w, 1343w, 1166w, 1139w, 1067w, 801 cm<sup>-1</sup>. <sup>1</sup>H NMR (200 MHz, CDCl<sub>3</sub>,  $\delta$ ): 8.06 (d,  $J$  = 5.6, H-C(2)), 6.26 (d,  $J$  = 5.6, H-C(3)), 5.94 (bs,  $H$ -N), 3.35-3.10 (m, 2H, -CH<sub>2</sub>HN-), 2.90-2.70 (m, 2H), 2.65-2.45 (m, 6H), 2.40-2.25 (m, 2H), 1.95-1.65 (m, 6H), 1.03 (t, 3H,  $J$  = 7.0, -CH<sub>2</sub>CH<sub>3</sub>). <sup>13</sup>C NMR (50 MHz, CDCl<sub>3</sub>,  $\delta$ ): 155.41, 147.13, 115.32, 101.84, 52.74, 46.73, 43.64, 32.68, 25.27, 23.17, 22.72, 22.54, 11.38. HRMS:  $m/z$  262.22666 corresponds to molecular formula C<sub>16</sub>H<sub>27</sub>N<sub>3</sub>H<sup>+</sup> (error

in ppm -4.25). HPLC purity ( $\lambda = 290$  nm): method A: RT 1.353, area 96.66%; method E: RT 4.016, area 99.41%.

***N*<sup>1</sup>,*N*<sup>1</sup>-diethyl-*N*<sup>4</sup>-(5,6,7,8-tetrahydroquinolin-4-yl)pentane-1,4-diamine (23).**

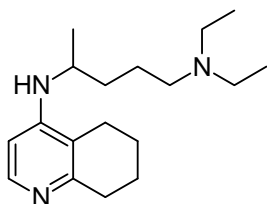

Compound **23** was prepared by procedure E, using Pd(OAc)<sub>2</sub> (1.1 mg, 0.0049 mmol), SPhos (4.1 mg, 0.0010 mmol), **45** (21 mg, 0.12 mmol), *N*<sup>1</sup>,*N*<sup>1</sup>-diethylpentane-1,4-diamine (29.7 mg, 0.188 mmol), K<sub>3</sub>PO<sub>4</sub> (66.5 mg, 0.312 mmol) and dioxane (1 mL). Final product **23** was obtained as colorless oil (9.9 mg, 27 %). IR (ATR): 3314w, 2967s, 2932s, 2865m, 2802m, 1589s, 1513m, 1452m, 1371w, 1342w, 1165w, 805 cm<sup>-1</sup>. <sup>1</sup>H NMR (200 MHz, CDCl<sub>3</sub>,  $\delta$ ): 8.07 (d, *J* = 5.6, H-C(2)), 6.32 (d, *J* = 5.6, H-C(3)), 3.85-3.70 (m, H-N), 3.65-3.47 (m, -CH-CH<sub>3</sub>), 2.95-2.71 (m, 2H), 2.60-2.25 (m, 8H), 1.95-1.75 (m, 4H), 1.63-1.44 (m, 4H), 1.22 (d, 3H, *J* = 6.7, -CH-CH<sub>3</sub>), 1.00 (t, 6H, *J* = 7.0, -CH<sub>2</sub>CH<sub>3</sub>). <sup>13</sup>C NMR (125 MHz, CDCl<sub>3</sub>,  $\delta$ ): 155.88, 150.68, 146.96, 114.97, 102.50, 52.75, 47.75, 46.79, 34.85, 32.75, 23.76, 22.79, 22.61, 22.52, 20.74, 11.56. HRMS: *m/z* 290.25771 corresponds to molecular formula C<sub>18</sub>H<sub>31</sub>N<sub>3</sub>H<sup>+</sup> (error in ppm - 4.69). HPLC purity ( $\lambda = 290$  nm): method A: RT 8.644, area 97.25%; method E: RT 4.084, area 97.18%.

**4-{5-[4-({[8-(5,6,7,8-tetrahydroquinolin-4-ylamino)octyl]amino}methyl)phenyl]-2-thienyl}benzonitrile (24).**

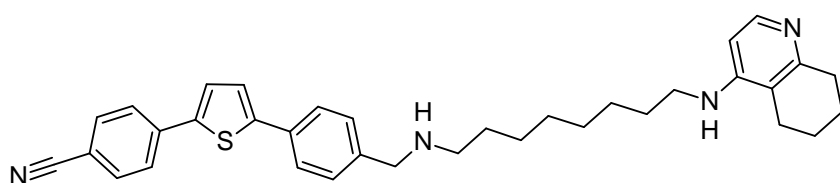

Compound **24** was prepared by procedure D, using aldehyde 4-[5-(4-formylphenyl)thiophen-2-yl]benzonitrile<sup>11</sup> (61 mg, 0.21 mmol), amine **46** (87 mg, 0.32 mmol), glac. AcOH (19  $\mu$ L, 0.32 mmol), NaBH<sub>4</sub> (47.9 mg, 1.27 mmol) and MeOH/ DCM (9 mL, 2:1, v/v). The product was purified using column chromatography (dry flash, silica-gel, eluent EtOAc/MeOH and flash, Biotage SP, NH column, eluent EtOAc/MeOH). Final product **24** was obtained as pale yellow solid (37 mg, 32%). M.p. = 155 – 157 °C. IR (film): 3328m, 2930s, 2856s, 2869m, 2221m, 1701w, 1670w, 1653m, 1590s, 1524s, 1494m, 1452m, 1347m, 1310m, 1277m, 1166m, 1098w, 804m cm<sup>-1</sup>. <sup>1</sup>H NMR (500 MHz, CDCl<sub>3</sub>,  $\delta$ ): 8.07 (d, *J* = 5.7, H-C(2)), 7.74-7.53 (m, 6H, 4H-

ArCN and 2H-Ar), 7.45-7.28 (m, 4H, 2H-Ar and 2H-Thiophene), 6.30 (d,  $J = 5.7$ , H-C(3)), 3.80 (s, 2H, ArCH<sub>2</sub>-), 3.24-3.08 (m, 2H, ArNHCH<sub>2</sub>-), 2.88-2.74 (m, 2H), 2.70-2.55 (m, 2H, ArCH<sub>2</sub>NHCH<sub>2</sub>-), 2.41-2.27 (m, 2H), 1.89-1.75 (m, 4H), 1.68-1.58 (m, 2H), 1.56-1.46 (m, 2H), 1.43-1.28(m, 8H, -(CH<sub>2</sub>)<sub>4</sub>-). <sup>13</sup>C NMR (125 MHz, CDCl<sub>3</sub>,  $\delta$ ): 155.56, 151.54, 146.92, 145.99, 140.80, 138.53, 132.72, 132.34, 128.74, 126.06, 125.77, 125.64, 124.16, 118.84, 115.00, 110.37, 102.21, 53.68, 49.45, 42.96, 32.56, 30.08, 29.43, 29.27, 29.21, 27.24, 26.98, 22.69, 22.60, 22.48. HRMS:  $m/z$  549.30216 corresponds to molecular formula C<sub>35</sub>H<sub>40</sub>N<sub>4</sub>SH<sup>+</sup> (error in ppm -4.52). HPLC purity ( $\lambda = 330$  nm): method A: RT 8.837, area 97.08%; method B: RT 7.689, area 95.53%.

**4-{5-[4-({methyl[8-(5,6,7,8-tetrahydroquinolin-4-ylamino)octyl]amino}methyl)phenyl]-2-thienyl}benzonitrile (25).**

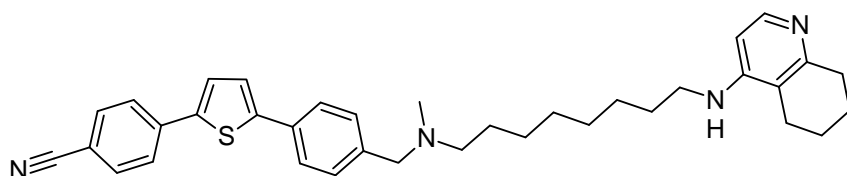

To a stirred solution of **24** (19 mg, 0.035 mmol) in methanol (0.9 mL) containing 37% aqueous

formaldehyde (2.1 mg, 0.069 mmol), mixture of ZnCl<sub>2</sub> (9.4 mg, 0.069 mmol) and NaBH<sub>3</sub>CN (8.7 mg, 0.14 mmol) in methanol (0.9 mL) was added. The mixture was stirred at r. t. for 2h. The solvent was removed under reduced pressure. The residue was dissolved in DCM and 2M NH<sub>3</sub>, organic layer was washed with brine and dried over anhydrous Na<sub>2</sub>SO<sub>4</sub>. The product was purified using column chromatography (flash, Biotage SP1, NH column, eluent MeOH). Final product **25** was obtained as pale yellow oil (16.4 mg, 84%). IR (film): 3267m, 3054m, 2928s, 2855s, 2225m, 1634s, 1600s, 1567s, 1537m, 1454m, 1374m, 1274m, 1175m, 1114w, 837m, 806m, 735m cm<sup>-1</sup>. <sup>1</sup>H NMR (500 MHz, CDCl<sub>3</sub>,  $\delta$ ): 8.08 (d,  $J = 5.7$ , H-C(2)), 7.72-7.62 (m, 4H, H-ArCN), 7.60-7.55 (m, 2H, H-Ar), 7.41-7.27 (m, 4H, 2H-thiophene and 2H-Ar), 6.30 (d,  $J = 6.3$ , H-C(3)), 3.49 (s, 2H, ArCH<sub>2</sub>NH-), 3.20-3.10 (m, 2H), 2.89-2.75 (m, 2H), 2.43-2.27 (m, 4H), 2.20 (s, 3H, CH<sub>3</sub>-), 1.90-1.78 (m, 4H), 1.68-1.58 (m, 4H), 1.57-1.47 (m, 2H), 1.43-1.28 (m, 8H, -(CH<sub>2</sub>)<sub>4</sub>-). <sup>13</sup>C NMR (125 MHz, CDCl<sub>3</sub>,  $\delta$ ): 155.81, 151.40, 147.21, 146.07, 140.64, 139.70, 138.55, 132.72, 132.30, 129.61, 126.06, 125.63, 125.57, 124.12, 118.85, 114.97, 110.34, 102.22, 61.99, 57.48, 42.97, 42.31, 32.79, 29.42, 29.30, 29.23, 27.38, 27.29, 27.02, 22.72, 22.67, 22.54. HRMS:  $m/z$  563.31839 corresponds to molecular formula C<sub>36</sub>H<sub>42</sub>N<sub>4</sub>SH<sup>+</sup> (error in ppm -3.38).

HPLC purity ( $\lambda = 330$  nm): method A: RT 8.651, area 96.45%; method B: RT 7.691, area 95.11%.

***tert*-Butyl {3-[(1-adamantylmethyl)amino]propyl}carbamate (**32**).**

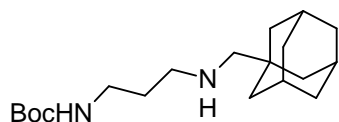

1-Adamantylmethanol (185.8 mg, 1.118 mmol) was dissolved in DCM (15 mL) followed by addition of PCC (361.3 mg, 1.676 mmol). The mixture was stirred at r.t. for 2h and filtered through SiO<sub>2</sub> column (eluent DCM) to afford the product. Adamantane-1-carbaldehyde was obtained as a white foam and used in the next step without characterization. Compound **32** was prepared by procedure D from **S1** (218.7 mg, 1.255 mmol) and adamantane-1-carbaldehyde (167.2 mg, 1.018 mmol) using glac. AcOH (0.09 mL, 1.6 mmol) and NaBH<sub>4</sub> (231.1 mg, 6.109 mmol). The product was purified using column chromatography (dry-flash, SiO<sub>2</sub>, eluent DCM/MeOH gradient 4/6 → 2/8). Final product **32** was obtained as a pale yellow oil (134.8 mg, 37% for both steps). IR (ATR): 3345s, 3054w, 3007w, 2977m, 2904s, 2847m, 2782w, 2738w, 2658w, 1674s, 1538s, 1479m, 1450m, 1427w, 1390w, 1364m, 1341w, 1315w, 1281s, 1253m, 1227w, 1169m, 1114w, 1028w, 1000w, 948w, 897w, 866w, 800w, 781w, 754w, 719w, 654w cm<sup>-1</sup>. <sup>1</sup>H NMR (500 MHz, CDCl<sub>3</sub>,  $\delta$ ): 6.06 (bs, H-NBoc), 3.22 (q, 2H,  $J = 5.2$ , -CH<sub>2</sub>NHBoc), 2.69 (t, 2H,  $J = 6.0$ , -CH<sub>2</sub>NHCH<sub>2</sub>Ad), 2.23 (s, 2H, -NHCH<sub>2</sub>Ad), 1.97 (bs, 3H, -Ad), 1.73-1.62 (m, 8H, -CH<sub>2</sub>CH<sub>2</sub>NHBoc, -Ad), 1.53 (d, 6H,  $J = 2.4$ , -Ad), 1.43 (s, 9H, -NHCOOC(CH<sub>3</sub>)<sub>3</sub>). <sup>13</sup>C NMR (125 MHz, CDCl<sub>3</sub>,  $\delta$ ): 156.20, 78.56, 62.78, 49.70, 40.89, 40.45, 37.21, 33.31, 28.72, 28.46, 28.44. HRMS:  $m/z$  323.26898 corresponds to molecular formula C<sub>19</sub>H<sub>34</sub>N<sub>2</sub>O<sub>2</sub>H<sup>+</sup> (error in ppm - 1.01).

***N*-(1-adamantylmethyl)propane-1,3-diamine (**33**).**

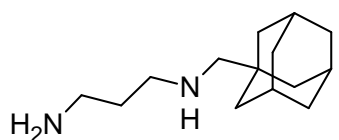

Compound **33** was prepared from **32** (10.0 mg, 0.031 mmol) by procedure C. Final product **33** was obtained as a pale yellow oil (6.0 mg, 87%). IR (ATR): 3290w, 2900s, 2845s, 2676w, 1571w, 1475m, 1408w, 1364w, 1341w, 1315w, 1222w, 1152w, 1100w, 1002w, 814w cm<sup>-1</sup>. <sup>1</sup>H NMR (500 MHz, CDCl<sub>3</sub>,  $\delta$ ): 2.76 (t, 2H,  $J = 6.9$ , -CH<sub>2</sub>NH<sub>2</sub>), 2.64 (t, 2H,  $J = 7.0$ , -CH<sub>2</sub>NHCH<sub>2</sub>Ad), 2.24 (s, 2H, -NHCH<sub>2</sub>Ad), 1.96 (bs, 3H, -Ad), 1.73-1.60 (m, 8H, -CH<sub>2</sub>CH<sub>2</sub>NH<sub>2</sub>, -Ad), 1.52 (d, 6H,  $J = 2.4$ , -Ad). <sup>13</sup>C NMR (125 MHz, CDCl<sub>3</sub>,  $\delta$ ): 63.12, 49.03, 40.95, 40.74, 37.24, 33.72, 33.34, 28.48.

HRMS:  $m/z$  223.21604 corresponds to molecular formula  $C_{14}H_{26}N_2H^+$  (error in ppm - 3.73);  $m/z$  112.11222 corresponds to molecular formula  $C_{14}H_{26}N_2H_2^{2+}$  (error in ppm 1.28).

**Di-*tert*-butyl [piperazine-1,4-diylbis(propane-3,1-diyl)]biscarbamate (35).**

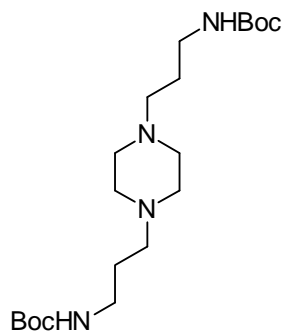

A 0.5 M solution of  $Boc_2O$  (2.12 g, 9.71 mmol) in DCM was added dropwise over 2 h to a 0.25 M solution of 1,4-bis(3-aminopropyl)piperazine **34** (4 mL, 19 mmol) in DCM cooled with an ice-bath. The reaction mixture was stirred overnight at r.t., filtered and then concentrated in vacuo. The resulting oil was dissolved in EtOAc, washed with half-saturated brine, dried over  $MgSO_4$  and solvent was evaporated under reduced pressure. Compound **35** was obtained after dry-flash chromatography: ( $SiO_2$ , eluent: DCM/MeOH( $NH_3$  satd) = 95/5) as a colorless solid (1.79 g, 46%); M.p. = 73-75 °C (hexane). IR (ATR): 3200m, 3008w, 2960m, 2869w, 2811m, 2744w, 2020w, 1712s, 1553m, 1457w, 1387w, 1362w, 1272m, 1169m, 1114w, 1084w, 1032w, 1005w, 972m, 888w, 856w, 819w, 764w, 733w, 693w  $cm^{-1}$ .  $^1H$  NMR (500 MHz,  $CDCl_3$ ): 3.30-3.05 (m, 2H,  $-CH_2NHBoc$ ), 2.75-2.25 (m, 12H,  $-CH_2N(CH_2CH_2)_2NCH_2-$ ,  $-N(CH_2CH_2)_2N-$ ), 1.85-1.55 (m, 2H,  $-CH_2CH_2NHBoc$ ), 1.44 (s, 18H,  $-NHCOO-C(CH_3)_3$ ).  $^{13}C$  NMR (125 MHz,  $CDCl_3$ ): 156.04; 78.74; 56.84; 53.20; 39.97; 28.42; 26.30. HRMS:  $m/z$  401.31137 corresponds to molecular formula  $C_{15}H_{32}N_4O_2H^+$  (error in ppm -2.15).

***Tert*-butyl [3-(4-{3-[(7-chloroquinolin-4-yl)amino]propyl}piperazin-1-yl)propyl]carbamate (36).**

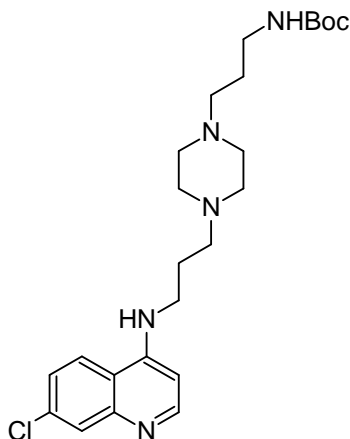

A mixture of 4,7-dichloroquinoline (1.75 g, 17.7 mmol) and protected diaminoalkane **35** (5.32 g, 17.7 mmol) was gradually warmed to 80 °C over 1h with stirring and subsequently at 125 °C for 6-8 h. The reaction mixture was cooled to r.t. and taken up in DCM. The organic layer was washed with  $NaHCO_3$  and finally with brine. The organic layer was dried over anhydrous  $Na_2SO_4$  and solvent was evaporated under reduced pressure to get a final product. Compound **36** was obtained after dry-flash chromatography ( $SiO_2$ , eluent: DCM/MeOH( $NH_3$  satd) = 100/2) as

a colorless solid (4.0 g, 63%); M.p. = 148-150 °C (hexane). IR (ATR): 3215m, 3032w, 2943w, 2876w, 2807w, 2771w, 1709s, 1611w, 1582s, 1537m, 1487w, 1466w, 1447w, 1361w, 1333w, 1308w, 1274m, 1252w, 1170m, 1149m, 1137m, 1102w, 1078w, 1063w, 1032w, 987w, 974w, 947w, 890w, 880w, 856w, 838w, 812w, 764w, 710w, 652w, 599w, 503w, 425w  $\text{cm}^{-1}$ .  $^1\text{H}$  NMR (200 MHz,  $\text{CDCl}_3/\text{CD}_3\text{OD}$ ): 8.40 (d, 1H,  $J = 5.6$  Hz, H-C(2)), 7.95-7.80 (m, 2H, H-C(8) and H-C(5)), 7.40-7.25 (m, 1H, H-C(6)), 6.34 (d, 1H,  $J = 5.6$  Hz, H-C(3)), 3.50-3.30 (m, 2H,  $\text{ArNHCH}_2-$ ), 3.30-3.10 (m, 2H,  $-\text{CH}_2\text{NHBoc}$ ), 3.00-2.30 (m, 12H,  $-\text{CH}_2\text{N}(\text{CH}_2\text{CH}_2)_2\text{NCH}_2-$ ,  $-\text{N}(\text{CH}_2\text{CH}_2)_2\text{N}-$ ), 2.10-1.80 (m, 2H,  $\text{ArNHCH}_2\text{CH}_2-$ ), 1.80-1.60 (m, 2H,  $-\text{CH}_2\text{CH}_2\text{NHBoc}$ ), 1.46 (s, 9H,  $-\text{NHCOO}-\text{C}(\text{CH}_3)_3$ ).  $^{13}\text{C}$  NMR (50 MHz,  $\text{CDCl}_3/\text{CH}_3\text{OD}$ ): 156.26; 151.34; 150.68; 148.26; 134.84; 127.38; 124.68; 122.26; 117.11; 98.21; 78.93; 57.81; 57.56; 56.37; 53.22; 53.02; 52.89; 43.04; 39.07; 28.15; 26.22; 23.54. HRMS:  $m/z$  462.26263 corresponds to molecular formula  $\text{C}_{24}\text{H}_{36}\text{ClN}_5\text{O}_2\text{H}^+$  (error in ppm -0.87). ( $\text{C}_{24}\text{H}_{36}\text{ClN}_5\text{O}_2 \times 1/3\text{H}_2\text{O}$ ) Calcd: C, 61.59; H, 7.90; N, 14.96. Found: C, 61.46; H, 7.75; N, 15.23.

***N*-{3-[4-(3-aminopropyl)piperazin-1-yl]propyl}-7-chloroquinolin-4-amine (37).**

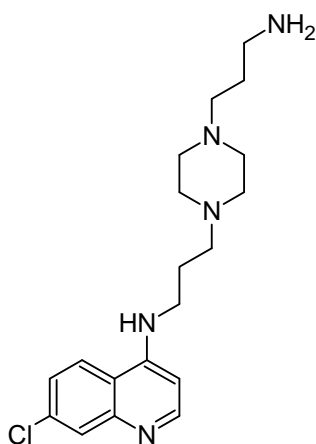

Compound **37** was prepared from **36** (500 mg, 1 mmol) by procedure C and was obtained as a yellow powder (348 mg, 89%), softens at 80-82°C. IR (ATR): 3234m, 3060w, 2934m, 2816m, 1610w, 1578s, 1538m, 1489w, 1463w, 1447w, 1433w, 1403w, 1368m, 1331m, 1283w, 1255w, 1201w, 1136m, 1112w, 1080w, 1033w, 999w, 904w, 878w, 854w, 819w, 806w, 764w, 730w, 649w, 621w, 598w, 539w, 494w, 430w  $\text{cm}^{-1}$ .  $^1\text{H}$  NMR (200 MHz,  $\text{CDCl}_3/\text{CD}_3\text{OD}$ ): 8.40 (d, 1H,  $J = 5.6$  Hz, H-C(2)), 8.00-7.80 (m, 2H, H-C(8), H-C(5)), 7.50-7.40 (br s, 1H,  $-\text{NH}$ ), 7.29 (dd, 1H,  $J = 2.4$  Hz,  $J = 9.0$  Hz, H-C(6)), 6.30 (d, 1H,  $J = 5.6$  Hz, H-C(3)), 3.50-3.20 (m, 2H,  $\text{ArNHCH}_2-$ ), 3.10-2.90 (m, 2H,  $-\text{CH}_2\text{NH}_2$ ), 2.90-2.40 (s, 12H,  $-\text{CH}_2\text{N}(\text{CH}_2\text{CH}_2)_2\text{NCH}_2-$ ,  $-\text{N}(\text{CH}_2\text{CH}_2)_2\text{N}-$ ), 2.10-1.80 (m, 2H,  $\text{ArNHCH}_2\text{CH}_2-$ ), 1.80-1.60 (m, 2H,  $-\text{CH}_2\text{CH}_2\text{NH}_2$ ).  $^{13}\text{C}$  NMR (50 MHz,  $\text{CDCl}_3/\text{CD}_3\text{OD}$ ): 151.40; 150.63; 148.28; 134.63; 127.43; 124.52; 122.30; 117.13; 98.16; 57.56; 56.24; 52.93; 43.06; 40.00; 29.35; 23.34. HRMS:  $m/z$  362.20995 corresponds to molecular formula  $\text{C}_{19}\text{H}_{28}\text{ClN}_5\text{H}^+$  (error in ppm -1.80).

***N*-{3-[4-(3-{[2-(1-Adamantyl)ethyl]amino}propyl)piperazin-1-yl]propyl}-7-chloroquinolin-4-amine (38).**

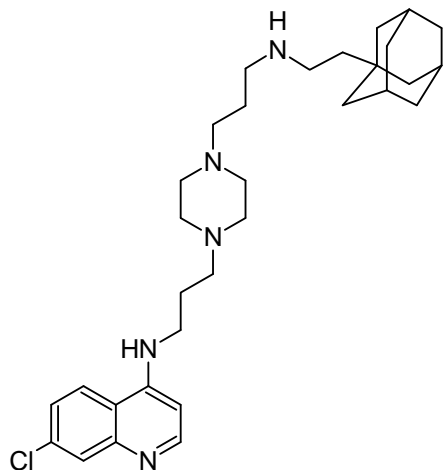

Compound **38** was prepared from amine **37** (137 mg, 0.38 mmol) and adamantane-1-acetaldehyde (68 mg, 0.38 mmol) using NaBH(OAc)<sub>3</sub> (161 mg, 0.76 mmol) by procedure D and was obtained after dry-flash chromatography (SiO<sub>2</sub>, eluent: DCM/MeOH(NH<sub>3</sub> satd) = 100/2) and flash chromatography (Biotage SP1 RP column, gradient: MeOH/H<sub>2</sub>O = 8/1→95/5) as a colorless foam (108 mg, 54%) softenes at 120-122 °C. IR (ATR): 3235m, 2899s, 2841m, 2806m, 1610w, 1586s, 1540m, 1486w, 1446m, 1368w, 1353w, 1332w, 1307w, 1283w, 1242w, 1198w, 1140m, 1074w, 1016w, 987m, 958m, 898w, 875w, 856w, 836w, 812m, 793, 759w, 728m, 596m, 501m, 428w cm<sup>-1</sup>. <sup>1</sup>H NMR (200 MHz, CDCl<sub>3</sub>): 8.50 (d, 1H, *J* = 5.0 Hz, H-C(2)), 8.00-7.80 (m, 2H, H-C(8), H-C(5)), 7.58 (br s, 1H, -NH), 7.30 (dd, 1H, *J* = 1.9 Hz, *J* = 9.0 Hz, H-C(6)), 6.30 (d, 1H, *J* = 5.6 Hz, H-C(3)), 3.45-3.25 (m, 2H, ArNHCH<sub>2</sub>-), 3.00-2.20 (m, 16H, -CH<sub>2</sub>NHCH<sub>2</sub>CH<sub>2</sub>Ad, -CH<sub>2</sub>CH<sub>2</sub>Ad, -N(CH<sub>2</sub>CH<sub>2</sub>)<sub>2</sub>N-, -CH<sub>2</sub> N(CH<sub>2</sub>CH<sub>2</sub>)<sub>2</sub>NCH<sub>2</sub>-), 2.10-1.40 (m, 19H, ArNHCH<sub>2</sub>CH<sub>2</sub>-, -CH<sub>2</sub>CH<sub>2</sub>NHCH<sub>2</sub>CH<sub>2</sub>Ad, -Ad), 1.40-1.35 (m, 2H, -CH<sub>2</sub>Ad). <sup>13</sup>C NMR (50 MHz, CDCl<sub>3</sub>): 152.12; 150.54; 148.99; 134.54; 128.44; 124.54; 122.43; 117.40; 98.38; 58.74; 57.25; 53.46; 53.28; 48.72; 44.17; 42.50; 37.00; 31.76; 28.51; 26.51; 23.27. Anal. (C<sub>31</sub>H<sub>46</sub>ClN<sub>5</sub> × 3/2H<sub>2</sub>O) Calcd: C, 67.55; H, 8.96; N, 12.71. Found: C, 67.86; H, 9.22; N, 12.89.

***N*-(prop-2-yn-1-yl)-*N'*-(quinolin-4-yl)butane-1,4-diamine (41).**

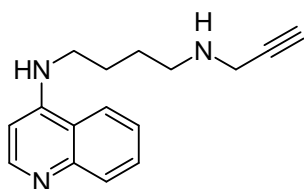

According to the procedure described in literature<sup>12</sup>, **AQ8**<sup>7</sup> (203.6 mg, 0.9457 mmol) was dissolved in EtOH<sub>aps</sub> (10 mL), K<sub>2</sub>CO<sub>3</sub> was added (130.7 mg, 0.9457 mmol), and then propargyl bromide (36 μL, 0.47 mmol). The mixture was stirred at r.t. for 24 h. Solvent was evaporated under the reduced pressure, and crude product was purified using column chromatography (dry-flash, SiO<sub>2</sub>, eluent DCM, DCM/MeOH gradient 7/3 → 3/7). Final product **41** was obtained as colorless oil (59 mg, 49%). IR (ATR): 3287m, 3066m, 2931m, 2856m, 1617w, 1579s, 1540m, 1457w, 1438w, 1395w, 1373w, 1339m, 1281w, 1251w, 1225w, 1170w,

1127w, 1036w, 867w, 808w, 763m, 651w  $\text{cm}^{-1}$ .  $^1\text{H}$  NMR (200 MHz,  $\text{CDCl}_3$ ,  $\delta$ ): 8.54 (d,  $J = 5.6$ , H-C(2)), 8.01-7.93 (m, H-C(8)), 7.82-7.75 (m, H-C(5)), 7.66-7.55 (m, H-C(7)), 7.45-7.34 (m, H-C(6)), 6.38 (d,  $J = 5.6$ , H-C(3)), 5.88-5.74 (m, H-N), 3.46-3.43 (m, 2H,  $-\text{CH}_2\text{C}\equiv\text{CH}$ ), 3.36-3.23 (m, 2H,  $\text{ArNHCH}_2-$ ), 2.82-2.72 (m, 2H,  $\text{ArNHCH}_2\text{CH}_2\text{CH}_2\text{CH}_2-$ ), 2.27-2.20 (m, 1H,  $-\text{C}\equiv\text{CH}$ ), 1.93-1.77 (m, 2H,  $\text{ArNHCH}_2\text{CH}_2-$ ), 1.75-1.59 (m, 2H,  $\text{ArNHCH}_2\text{CH}_2\text{CH}_2-$ ).  $^{13}\text{C}$  NMR (50 MHz,  $\text{CDCl}_3$ ,  $\delta$ ): 151.01, 149.85, 148.37, 129.74, 128.85, 124.37, 119.64, 118.80, 98.50, 81.82, 71.50, 47.85, 43.01, 38.05, 27.39, 26.24. HRMS:  $m/z$  254.16429 corresponds to molecular formula  $\text{C}_{16}\text{H}_{19}\text{N}_3\text{H}^+$  (error in ppm -3.47).

#### ***N*-(7-chloroquinolin-4-yl)acetamide (42).**<sup>10</sup>

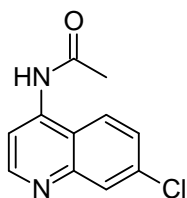

A solution of **S2** (844 mg, 4.73 mmol) in acetic anhydride (3.4 mL) was refluxed for 2h. After cooling to r.t. brine and 10% aqueous NaOH were added. The mixture was extracted with ethyl acetate and organic extracts were dried over anh.  $\text{Na}_2\text{SO}_4$ . The product was purified using column chromatography (dry-flash,  $\text{SiO}_2$ , eluent EtOAc/MeOH and flash, Biotage SP1, RP column, eluent MeOH/ $\text{H}_2\text{O}$ ). Final product **42** was obtained as white solid (799 mg, 91 %). M.p. = 169 – 172  $^\circ\text{C}$ . IR (KBr): 3434s, 3267s, 3048m, 2924m, 2852m, 1662s, 1614s, 1594m, 1570s, 1528s, 1491s, 1444m, 1422m, 1384m, 1371m, 1311s, 1274m, 1244m, 1187w, 1167w, 1104w, 1081w, 1041w, 1016w, 959w, 970w, 918w, 854m, 833m, 818m, 765w, 714m, 668w, 636w, 615w, 587w, 557w, 519w, 502w, 474w, 433w, 420w, 403w  $\text{cm}^{-1}$ .  $^1\text{H}$  NMR (500 MHz,  $\text{CD}_3\text{OD}$ ,  $\delta$ ): 8.79-8.68 (m, H-C(2)), 8.26-8.19 (m, H-C(5)), 8.18-8.11 (m, H-C(8)), 8.30-7.92 (m, H-C(3)), 2.33 (s, 3H,  $\text{CH}_3$ ).  $^{13}\text{C}$  NMR (125 MHz,  $\text{CD}_3\text{OD}$ ,  $\delta$ ): 172.74, 153.10, 150.25, 144.14, 137.05, 128.55, 128.39, 124.95, 121.12, 113.90, 24.30. HRMS:  $m/z$  221.04691 corresponds to molecular formula  $\text{C}_{11}\text{H}_9\text{ClN}_2\text{OH}^+$  (error in ppm -3.19).

#### ***N*-(5,6,7,8-tetrahydroquinolin-4-yl)acetamide (43).**

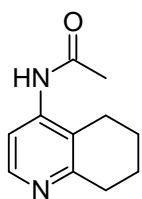

Compound **42** (551 mg, 2.49 mmol) was hydrogenated using  $\text{PtO}_2$  (55 mg, 10 wt. %) as catalyst under hydrogen (50 psi) in glacial AcOH (48 mL) and perchloric acid (0.3 mL). The mixture was shaken at r.t. for 64 h. The catalyst was filtered off, 10% NaOH in water was added to filtrate, extracted with DCM and dried over anh.  $\text{Na}_2\text{SO}_4$ . The product was purified using column chromatography (dry-flash,  $\text{SiO}_2$ , eluent



EtOAc/MeOH). Final product **43** was obtained as white solid (310 mg, 65 %). M.p. = 148 – 151 °C. IR (ATR): 3352m, 3147m, 3069m, 2934s, 2860m, 1702s, 1682s, 1583s, 1514s, 1459m, 1435m, 1406m, 1369m, 1337m, 1297s, 1254m, 1166w, 1002w, 845w, 736w cm<sup>-1</sup>. <sup>1</sup>H NMR (500 MHz, CD<sub>3</sub>OD, δ): 8.17 (d, *J* = 5.5, H-C(2)), 7.72 (d, *J* = 5.5, H-C(3)), 2.92-2.82 (m, 2H, H-C(8)), 2.72-2.65 (m, 2H, H-C(5)), 2.20 (s, 3H, CH<sub>3</sub>), 1.91-1.79 (m, 4H, H-C(6) and H-C(7)). <sup>13</sup>C NMR (125 MHz, CD<sub>3</sub>OD, δ): 172.45, 158.64, 146.69, 146.37, 125.22, 116.29, 33.14, 24.81, 24.00, 23.47, 23.41. HRMS: *m/z* 191.11758 corresponds to molecular formula C<sub>11</sub>H<sub>14</sub>N<sub>2</sub>OH<sup>+</sup> (error in ppm -1.64).

#### 5,6,7,8-Tetrahydroquinolin-4-amine (**44**).

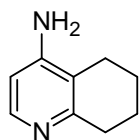

The solution of **43** in 2M HCl was stirred for 3 h at 70 °C. After cooling to r. t., ammonia was added. The mixture was extracted with DCM and dried over anh. Na<sub>2</sub>SO<sub>4</sub>. Final product **44** was obtained after evaporation of organic layer as pale yellow solid (182 mg, 89 %). M.p. = 125 – 126 °C. IR (ATR): 3336s, 3194s, 2933s, 2860m, 1637s, 1590s, 1481m, 1451m, 1351m, 1274w, 1190w, 1164w, 1102w, 899w, 818m, 736 cm<sup>-1</sup>. <sup>1</sup>H NMR (500 MHz, CDCl<sub>3</sub>, δ): 8.02 (d, *J* = 5.5, H-C(2)), 6.38 (d, *J* = 5.5, H-C(3)), 4.05 (bs, NH<sub>2</sub>), 2.95-2.73 (m, 2H, H-C(5)), 2.59-2.33 (m, 2H, H-C(8)), 2.10-1.76 (m, 4H, H-C(6) and H-C(7)). <sup>13</sup>C NMR (125 MHz, CDCl<sub>3</sub>, δ): 157.03, 150.83, 146.74, 115.84, 107.10, 32.71, 22.87, 22.75, 22.48. HRMS: *m/z* 149.10661 corresponds to molecular formula C<sub>9</sub>H<sub>12</sub>N<sub>2</sub>H<sup>+</sup> (error in ppm -4.78).

#### 4-Chloro-5,6,7,8-tetrahydroquinoline (**45**).

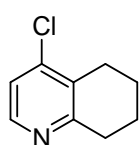

To a stirring solution of **44** (380 mg, 2.6 mmol) in glac. AcOH (2.3 mL) at 0 °C, 28% HCl (1.5 mL) and aqueous solution of NaNO<sub>2</sub> (257 mg, 0.85 mL) were added dropwise, respectively. After 10 minutes at 0 °C, resulting mixture was added dropwise to a solution of CuCl (659 mg, 6.66 mmol) in 28 % HCl (1.2 mL) at same temperature. The stirring was continued at r. t. After 17 h, solution of NaOH in water was added and extracted with DCM. Organic layer was dried over anh. Na<sub>2</sub>SO<sub>4</sub>. The crude product was purified using column chromatography (dry-flash, SiO<sub>2</sub>, eluent EtOAc/MeOH). Final product **45** was obtained as a colorless oil (226 mg, 53%). IR (ATR): 3041w, 2937s, 2863s, 1734w, 1674w, 1553s, 1451s, 1432m, 1400s, 1332w, 1230w, 1194w, 1161w, 1082w, 1061w, 953w, 834m, 787m, 672w cm<sup>-1</sup>.

$^1\text{H}$  NMR (500 MHz,  $\text{CDCl}_3$ ,  $\delta$ ): 7.77-7.65 (m, H-C(2)), 7.58-7.48 (m, H-C(3)), 1.88-1.20 (m, 8H, H-C(5), H-C(6), H-C(7) and H-C(8)). GC/MS ( $m/z$  (%)): 165.9 ( $[\text{M}^+]$ , 100); 132.0 (33).

***N*<sup>1</sup>-(5,6,7,8-tetrahydroquinolin-4-yl)octane-1,8-diamine (46).**

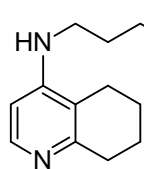

Compound **46** was prepared by procedure E, using  $\text{Pd}(\text{OAc})_2$  (9.9 mg, 0.044 mmol), SPhos (36.3 mg, 0.0883 mmol), **45** (185 mg, 1.10 mmol), 1,8-diaminooctane (239 mg, 1.66 mmol),  $\text{K}_3\text{PO}_4$  (587 mg, 2.76 mmol) and dioxane (9.3 mL). Final product **46** was obtained as colorless oil (200 mg, 66%). IR (ATR): 3299m, 2928s, 2855s, 1592s, 1523m, 1456m, 1344m, 1165w, 808  $\text{cm}^{-1}$ .  $^1\text{H}$  NMR (500 MHz,  $\text{CDCl}_3$ ,  $\delta$ ): 8.08 (d,  $J = 5.7$ , H-C(2)), 6.31 (d,  $J = 5.7$ , H-C(3)), 3.93 (s, H-N, exchangeable with  $\text{D}_2\text{O}$ ), 3.25 – 3.05 (m, 2H), 2.90 – 2.75 (m, 2H), 2.68 (t,  $J = 7.0$ , 2H), 2.41 – 2.26 (m, 2H), 1.94 – 1.76 (m, 4H), 1.74 – 1.54 (m, 4H), 1.50 – 1.25 (m, 8H).  $^{13}\text{C}$  NMR (125 MHz,  $\text{CDCl}_3$ ,  $\delta$ ): 155.72, 151.44, 147.10, 114.97, 102.21, 42.95, 42.19, 33.75, 32.71, 29.37, 29.31, 29.21, 26.99, 26.79, 22.70, 22.64, 22.50. HRMS:  $m/z$  276.24282 corresponds to molecular formula  $\text{C}_{17}\text{H}_{29}\text{N}_3\text{H}^+$  (error in ppm -2.19).

**Table S1.** *In vitro* activities against *L. infantum* and *L. tropica* promastigotes and cytotoxicity against THP-1 human cells<sup>a</sup>

| Comp.                | <i>L. infantum</i> IC <sub>50</sub> (μM) <sup>b</sup> | <i>L. tropica</i> IC <sub>50</sub> (μM) <sup>b</sup> | THP-1 IC <sub>50</sub> (μM) <sup>c</sup> | SI (THP/ <i>L.i.</i> ) <sup>d</sup> | SI (THP/ <i>L.t.</i> ) <sup>d</sup> | Ref. of comp. <sup>e</sup> |
|----------------------|-------------------------------------------------------|------------------------------------------------------|------------------------------------------|-------------------------------------|-------------------------------------|----------------------------|
| 1                    | 8.67                                                  | 2.77                                                 | 23.66                                    | 2.7                                 | 8.5                                 | new                        |
| 2                    | 6.49                                                  | 2.96                                                 | >109.6                                   | >16.9                               | >37.0                               | new                        |
| 3                    | 16.60                                                 | 9.35                                                 | >65.2                                    | >3.9                                | >7.0                                | new                        |
| 4                    | 16.60                                                 | 6.63                                                 | >59.7                                    | >3.6                                | >9.0                                | new                        |
| 5                    | 1.91                                                  | 2.24                                                 | 12.59                                    | 6.6                                 | 5.6                                 | new                        |
| 6                    | 1.77                                                  | 1.30                                                 | 6.39                                     | 3.6                                 | 4.9                                 | new                        |
| 7                    | 0.73                                                  | 0.66                                                 | 1.81                                     | 2.5                                 | 2.7                                 | 14                         |
| 8                    | 2.46                                                  | 1.84                                                 | 3.29                                     | 1.3                                 | 1.8                                 | 14                         |
| 9                    | 2.40                                                  | 2.35                                                 | 4.90                                     | 2.0                                 | 2.1                                 | 14                         |
| 10                   | 0.52                                                  | 0.51                                                 | 1.00                                     | 1.9                                 | 2.0                                 | new                        |
| 11                   | 1.14                                                  | 1.31                                                 | 2.96                                     | 2.6                                 | 2.3                                 | 7                          |
| 12                   | 0.64                                                  | 0.68                                                 | 3.76                                     | 5.8                                 | 5.5                                 | 7                          |
| 13                   | 1.23                                                  | 1.24                                                 | 4.25                                     | 3.4                                 | 3.4                                 | 7                          |
| 14                   | 0.51                                                  | 0.50                                                 | 1.91                                     | 3.8                                 | 3.8                                 | 7                          |
| 15                   | 0.48                                                  | 0.43                                                 | 4.73                                     | 9.9                                 | 10.9                                | new                        |
| 16                   | 1.03                                                  | 0.81                                                 | 2.31                                     | 2.2                                 | 2.8                                 | 11                         |
| 17                   | 1.02                                                  | 0.85                                                 | 4.28                                     | 4.2                                 | 5.0                                 | 13                         |
| 18                   | 1.24                                                  | 1.02                                                 | 2.35                                     | 1.9                                 | 2.3                                 | 15                         |
| 19                   | 0.98                                                  | 0.91                                                 | 2.44                                     | 2.5                                 | 2.7                                 | 11                         |
| 20                   | 1.55                                                  | 1.22                                                 | 2.79                                     | 1.8                                 | 2.3                                 | 11                         |
| 21                   | 1.02                                                  | 1.37                                                 | 7.11                                     | 7.0                                 | 5.2                                 | new                        |
| 22                   | >76.5                                                 | >76.5                                                | >76.5                                    | >1                                  | >1                                  | new                        |
| 23                   | >69.1                                                 | >69.1                                                | >69.1                                    | >1                                  | >1                                  | new                        |
| 24                   | 0.72                                                  | 0.75                                                 | 2.31                                     | 3.2                                 | 3.1                                 | new                        |
| 25                   | 0.83                                                  | 0.80                                                 | 3.68                                     | 4.4                                 | 4.6                                 | new                        |
| 26                   | 2.30                                                  | 1.94                                                 | 5.01                                     | 2.2                                 | 2.6                                 | 11                         |
| 27                   | 1.22                                                  | 1.54                                                 | 2.80                                     | 2.3                                 | 1.8                                 | 11                         |
| 28                   | 5.42                                                  | 7.11                                                 | 8.10                                     | 1.5                                 | 1.1                                 | 11                         |
| 29                   | 0.35                                                  | 0.30                                                 | 1.38                                     | 4.0                                 | 4.6                                 | 11                         |
| 30                   | 0.80                                                  | 1.06                                                 | 3.85                                     | 4.8                                 | 3.6                                 | 11                         |
| Control <sup>f</sup> | 0.13                                                  | 0.14                                                 | >10.8                                    | >83.1                               | >77.1                               | /                          |

<sup>a</sup>Antileishmanial IC<sub>50</sub> values against promastigote stages (μM), MTT assay; <sup>b</sup>All *in vitro* experiments were performed in duplicate, mean values are given; <sup>c</sup>Cytotoxicity against differentiated THP-1, human monocytic cell line derived from an acute monocytic leukemia patient. <sup>d</sup>Selectivity index; <sup>e</sup>The syntheses of compounds are presented in our previous papers<sup>7,11,13,14,15</sup>. <sup>f</sup>Control drug: amphotericin B

**Table S2.** *In vitro* activities against intramacrophage *L. infantum* amastigotes

| Compound             | <i>In Vitro</i><br>Antiamastigote<br>Activity<br>at 0.5 $\mu$ M <sup>a</sup> | <i>In Vitro</i><br>Antiamastigote<br>Activity<br>IC <sub>50</sub> ( $\mu$ M) <sup>b</sup> | THP-1 <sup>c</sup><br>IC <sub>50</sub> ( $\mu$ M) | SI<br>(THP/IPT) <sup>d</sup> |
|----------------------|------------------------------------------------------------------------------|-------------------------------------------------------------------------------------------|---------------------------------------------------|------------------------------|
| 1                    | 8.9                                                                          |                                                                                           | 23.7                                              |                              |
| 2                    | 0.2                                                                          |                                                                                           | >109.6                                            |                              |
| 3                    | 18.3                                                                         |                                                                                           | >65.2                                             |                              |
| 4                    | 0                                                                            |                                                                                           | >59.7                                             |                              |
| 5                    | 13.9                                                                         |                                                                                           | 12.6                                              |                              |
| 6                    | 23.3                                                                         |                                                                                           | 6.40                                              |                              |
| 7                    | 15.8                                                                         |                                                                                           | 1.80                                              |                              |
| 8                    | 29.6                                                                         | 1.91                                                                                      | 3.29                                              | 1.72                         |
| 9                    | 22                                                                           |                                                                                           | 4.90                                              |                              |
| 10                   | 72.2                                                                         | 0.31                                                                                      | 1.00                                              | 3.22                         |
| 11                   | 26.4                                                                         | 1.85                                                                                      | 2.96                                              | 1.60                         |
| 12                   | 0                                                                            |                                                                                           | 3.76                                              |                              |
| 13                   | 38.9                                                                         | 1.29                                                                                      | 4.25                                              | 3.29                         |
| 14                   | 26.4                                                                         | >1                                                                                        | 1.91                                              | < 1.91                       |
| 15                   | 47.6                                                                         | 0.58                                                                                      | 4.73                                              | 8.15                         |
| 16                   | 10.4                                                                         |                                                                                           | 2.31                                              |                              |
| 17                   | 14.4                                                                         |                                                                                           | 4.28                                              |                              |
| 18                   | 42.7                                                                         | 0.65                                                                                      | 2.35                                              | 3.61                         |
| 19                   | 36.9                                                                         | 0.73                                                                                      | 2.44                                              | 3.34                         |
| 20                   | 42.2                                                                         | 0.79                                                                                      | 2.79                                              | 3.51                         |
| 21                   | 21                                                                           |                                                                                           | 7.11                                              |                              |
| 22                   | 1.1                                                                          |                                                                                           | >76.5                                             |                              |
| 23                   | 11.8                                                                         |                                                                                           | >69.1                                             |                              |
| 24                   | 29.6                                                                         | >1                                                                                        | 2.31                                              | < 2.3                        |
| 25                   | 20.5                                                                         |                                                                                           | 3.68                                              |                              |
| 26                   | 2.4                                                                          |                                                                                           | 5.01                                              |                              |
| 27                   | 12.7                                                                         |                                                                                           | 2.80                                              |                              |
| 28                   | 13.8                                                                         |                                                                                           | 8.10                                              |                              |
| 29                   | 13.5                                                                         |                                                                                           | 1.38                                              |                              |
| 30                   | 23.6                                                                         |                                                                                           | 3.85                                              |                              |
| Control <sup>e</sup> | 95.5                                                                         | 0.21                                                                                      | >10.8                                             | >51.4                        |

<sup>a</sup>Mean value of two or three experiments. <sup>b</sup>Mean value of two experiments. <sup>c</sup>Cytotoxicity against differentiated THP-1, human monocytic cell line derived from an acute monocytic leukemia patient. <sup>d</sup>Selectivity Index (IC<sub>50</sub> against THP-1/IC<sub>50</sub> against intracellular amastigotes); <sup>e</sup>Control drug: amphotericin B.

**Table S3.** Antileishmanial activity *in vivo*.

| <b>Control (PBS)</b> | <b>Liver weight in mg (W)</b> | <b>Amastigotes/Liver cell (A/C)</b> | <b>Relative load W x A/C</b> |
|----------------------|-------------------------------|-------------------------------------|------------------------------|
| 1                    | 930                           | 40/503                              | 74.0                         |
| 2                    | 1000                          | 44/502                              | 87.6                         |
| 3                    | 700                           | 49/507                              | 67.6                         |
| 4                    | 630                           | 35/506                              | 43.6                         |
| 5                    | 622                           | 47/500                              | 58.5                         |
| <b>Mean</b>          |                               |                                     | <b>66.3</b>                  |

| <b>Comp. 10<br/>(100mg/kg × 4 days, p.o.)</b> | <b>Liver weight in mg (W)</b> | <b>Amastigotes/Liver cell (A/C)</b> | <b>Relative load W x A/C</b> |
|-----------------------------------------------|-------------------------------|-------------------------------------|------------------------------|
| 1                                             | 672                           | 0/500                               | 0                            |
| 2                                             | 636                           | 0/500                               | 0                            |
| 3                                             | 798                           | 0/500                               | 0                            |
| <b>Mean</b>                                   |                               |                                     | <b>0</b>                     |
| <b>Reduction from control (%)</b>             |                               |                                     | <b>100</b>                   |

**Note:** signs of toxicity; 1 mouse died on D10; 1 mouse died on D12

| <b>Comp. 10<br/>(60mg/kg × 4 days, p.o.)</b> | <b>Liver weight in mg (W)</b> | <b>Amastigotes/Liver cell (A/C)</b> | <b>Relative load W x A/C</b> |
|----------------------------------------------|-------------------------------|-------------------------------------|------------------------------|
| 1                                            | 655                           | 2/505                               | 2.6                          |
| 2                                            | 482                           | 2/500                               | 1.9                          |
| 3                                            | 653                           | 3/507                               | 3.9                          |
| 4                                            | 753                           | 1/500                               | 1.5                          |
| 5                                            | 756                           | 2/503                               | 3.0                          |
| <b>Mean</b>                                  |                               |                                     | <b>2.6</b>                   |
| <b>Reduction from control (%)</b>            |                               |                                     | <b>96.1</b>                  |

| <b>Comp. 10<br/>(10mg/kg × 4 days, s.c.)</b> | <b>Liver weight in mg (W)</b> | <b>Amastigotes/Liver cell (A/C)</b> | <b>Relative load W x A/C</b> |
|----------------------------------------------|-------------------------------|-------------------------------------|------------------------------|
| 1                                            | 575                           | 10/500                              | 11.5                         |
| 2                                            | 544                           | 12/510                              | 12.8                         |
| 3                                            | 666                           | 12/507                              | 15.7                         |
| 4                                            | 528                           | 9/500                               | 9.5                          |
| 5                                            | 609                           | 10/508                              | 12.0                         |
| <b>Mean</b>                                  |                               |                                     | <b>12.3</b>                  |
| <b>Reduction from control (%)</b>            |                               |                                     | <b>81.4</b>                  |

| <b>Comp. 15<br/>(100mg/kg × 4 days, p.o.)</b> | <b>Liver weight in mg (W)</b> | <b>Amastigotes/Liver cell (A/C)</b> | <b>Relative load W x A/C</b> |
|-----------------------------------------------|-------------------------------|-------------------------------------|------------------------------|
| 1                                             | 638                           | 1/500                               | 1.3                          |
| 2                                             | 630                           | 2/503                               | 2.5                          |
| 3                                             | 747                           | 0/500                               | 0                            |
| 4                                             | 830                           | 0/508                               | 0                            |
| 5                                             | 513                           | 0/503                               | 0                            |
| <b>Mean</b>                                   |                               |                                     | <b>0.76</b>                  |

|                                   |  |  |             |
|-----------------------------------|--|--|-------------|
| <b>Reduction from control (%)</b> |  |  | <b>98.8</b> |
|-----------------------------------|--|--|-------------|

| <b>Comp. 15</b><br>(50mg/kg × 4 days, p.o.) | <b>Liver weight in mg</b><br>(W) | <b>Amastigotes/Liver cell</b><br>(A/C) | <b>Relative load</b><br>W x A/C |
|---------------------------------------------|----------------------------------|----------------------------------------|---------------------------------|
| 1                                           | 838                              | 2/506                                  | 3.3                             |
| 2                                           | 730                              | 2/510                                  | 2.9                             |
| 3                                           | 695                              | 3/500                                  | 4.2                             |
| 4                                           | 725                              | 2/502                                  | 2.9                             |
| 5                                           | 572                              | 3/503                                  | 3.4                             |
| <b>Mean</b>                                 |                                  |                                        | <b>3.3</b>                      |
| <b>Reduction from control (%)</b>           |                                  |                                        | <b>95.0</b>                     |

**Table S4.** Antileishmanial activity *in vivo*.

| <b>Control (PBS)</b>      | <b>Liver weight in mg</b><br>(W) | <b>Amastigotes/Liver cell</b><br>(A/C) | <b>Relative load</b><br>W x A/C |
|---------------------------|----------------------------------|----------------------------------------|---------------------------------|
| 1                         | 720                              | 50/503                                 | 71.6                            |
| 2                         | 820                              | 56/500                                 | 91.8                            |
| 3                         | 950                              | 48/513                                 | 90.7                            |
| 4                         | 570                              | 50/548                                 | 52.0                            |
| 5                         | 510                              | 46/500                                 | 46.9                            |
| <b>Mean relative load</b> |                                  |                                        | <b>70.6</b>                     |

| <b>Comp. 10</b><br>(5mg/kg × 5 days, s.c.) | <b>Liver weight in mg</b><br>(W) | <b>Amastigotes/Liver cell</b><br>(A/C) | <b>Relative load</b><br>W x A/C |
|--------------------------------------------|----------------------------------|----------------------------------------|---------------------------------|
| 1                                          | 680                              | 24/500                                 | 32.6                            |
| 2                                          | 780                              | 20/510                                 | 30.6                            |
| 3                                          | 750                              | 18/500                                 | 27.0                            |
| 4                                          | 720                              | 25/500                                 | 36.0                            |
| 5                                          | 600                              | 22/515                                 | 25.6                            |
| <b>Mean relative load</b>                  |                                  |                                        | <b>30.4</b>                     |
| <b>Reduction from control (%)</b>          |                                  |                                        | <b>56.9</b>                     |

| <b>Comp. 15</b><br>(10mg/kg × 5 days, s.c.) | <b>Liver weight in mg</b><br>(W) | <b>Amastigotes/Liver cell</b><br>(A/C) | <b>Relative load</b><br>W x A/C |
|---------------------------------------------|----------------------------------|----------------------------------------|---------------------------------|
| 1                                           | 920                              | 22/500                                 | 40.5                            |
| 2                                           | 720                              | 23/510                                 | 32.5                            |
| 3                                           | 810                              | 23/500                                 | 37.3                            |
| 4                                           | 890                              | 21/520                                 | 35.9                            |
| 5                                           | 740                              | 25/515                                 | 35.9                            |
| <b>Mean relative load</b>                   |                                  |                                        | <b>36.4</b>                     |
| <b>Reduction from control (%)</b>           |                                  |                                        | <b>48.4</b>                     |

| <b>Comp. 15</b><br>(5mg/kg × 5 days, s.c.) | <b>Liver weight in mg</b><br>(W) | <b>Amastigotes/Liver cell</b><br>(A/C) | <b>Relative load</b><br>W x A/C |
|--------------------------------------------|----------------------------------|----------------------------------------|---------------------------------|
| 1                                          | 1080                             | 28/500                                 | 60.5                            |
| 2                                          | 830                              | 30/510                                 | 48.8                            |
| 3                                          | 680                              | 38/500                                 | 51.7                            |

|                                   |     |        |             |
|-----------------------------------|-----|--------|-------------|
| 4                                 | 600 | 40/500 | 48.0        |
| 5                                 | 570 | 38/500 | 43.3        |
| <b>Mean relative load</b>         |     |        | <b>50.5</b> |
| <b>Reduction from control (%)</b> |     |        | <b>28.5</b> |

| <b>Comp. 15</b><br>(1mg/kg × 5 days, s.c.) | <b>Liver weight in mg</b><br>(W) | <b>Amastigotes/Liver cell</b><br>(A/C) | <b>Relative load</b><br>W x A/C |
|--------------------------------------------|----------------------------------|----------------------------------------|---------------------------------|
| 1                                          | 670                              | 44/506                                 | 58.3                            |
| 2                                          | 780                              | 42/510                                 | 64.2                            |
| 3                                          | 600                              | 45/500                                 | 54.0                            |
| 4                                          | 800                              | 43/500                                 | 68.8                            |
| 5                                          | 500                              | 44/500                                 | 44.0                            |
| <b>Mean relative load</b>                  |                                  |                                        | <b>57.9</b>                     |
| <b>Reduction from control (%)</b>          |                                  |                                        | <b>18.0</b>                     |

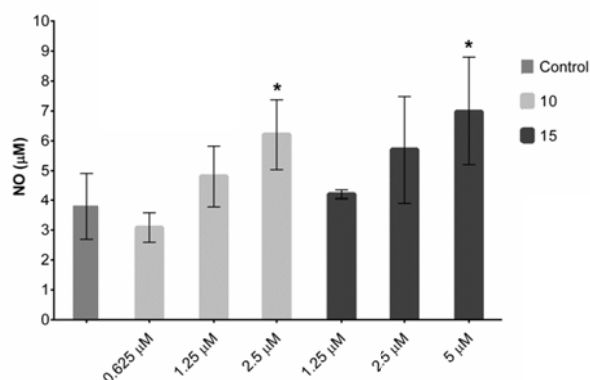

**Figure S1.** Nitric oxide production by BMDM treated with 10 or 15. BMDM were primed with IFN- $\gamma$  for 2 h, and then treated with different concentrations of 10 or 15. Levels of nitrite were measured into the supernatants after 24h by Griess assay. Data are the mean  $\pm$  SD of three independent experiments in triplicate. \*p < 0.01 versus control

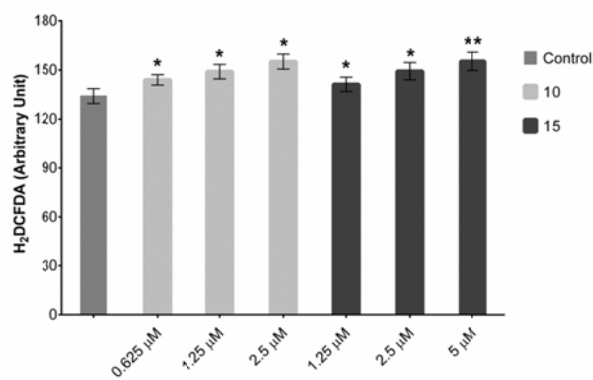

**Figure S2.** ROS production by BMDM treated with 10 or 15. BMDM were primed with IFN- $\gamma$  for 2 h, and then treated with different concentrations of 10 or 15. Levels of ROS were measured into the supernatants after 24h by H<sub>2</sub>DCFDA. Data are the mean  $\pm$  SD of three independent experiments in triplicate. \*p < 0.01 versus control; \*\*p < 0.001 versus control

1. Baiocco, P.; Ilari, A.; Ceci, P.; Orsini, S.; Gramiccia, M.; Di Muccio, T.; Colotti, G. Inhibitory Effect of Silver Nanoparticles on Trypanothione Reductase Activity and *Leishmania infantum* Proliferation. *ACS Med. Chem. Lett.* **2011**, *2*, 230–233.
2. D'Alessandro, S.; Gelati, M.; Basilico, N.; Parati, E. A.; Haynes, R. K.; Taramelli, D. Differential Effects on Angiogenesis of Two Antimalarial Compounds, Dihydroartemisinin and Artemisone: Implications for Embryotoxicity. *Toxicology* **2007**, *241*, 66–74.
3. Hornung, V.; Bauernfeind, F.; Halle, A.; Samstad, E. O.; Kono, H.; Rock, K. L.; Fitzgerald, K. A.; Latz, E. Silica Crystals and Aluminum Salts Activate the NALP3 Inflammasome through Phagosomal Destabilization. *Nat. Immunol.* **2008**, *9*, 847–856.
4. Corbett, Y.; Parapini, S.; D'Alessandro, S.; Scaccabarozzi, D.; Rocha, B. C.; Egan, T. J.; Omar, A.; Galastri, L.; Fitzgerald, K. A.; Golenbock, D. T.; Taramelli, D.; Basilico, N. Involvement of Nod2 in the Innate Immune Response Elicited by Malarial Pigment Hemozoin. *Microbes Infect.* **2015**, *17*, 184–194.
5. Gatta, F.; Perotti, F.; Gradoni, L.; Gramiccia, M.; Orsini, S.; Palazzo, G.; Rossi, V. Synthesis of Some 1-(Dihydroxypropyl)pyrazolo [3,4 d] pyrimidines and In Vivo Evaluation of their Antileishmanial and Antitrypanosomal Activity. *Eur. J. Med. Chem.* **1990**, *25*, 419–424.
6. Gerster, J. F.; Lindstrom, K. J.; Miller, R. L.; Tomai, M. A.; Birmachu, W.; Bomersine, S. N.; Gibson, S. J.; Imbertson, L. M.; Jacobson, J. R.; Knafla, R. T.; Maye, P. V.; Nikolaides, N.; Oneyemi, F. Y.; Parkhurst, G. J.; Pecore, S. E.; Reiter, M. J.; Scribner, L. S.; Testerman, T. L.; Thompson, N. J.; Wagner, T. L.; Weeks, C. E.; Andre, J.-D.; Lagain, D.; Bastard, Y.; Lupu, M. Synthesis and Structure–Activity–Relationships of 1*H*-Imidazo[4,5-*c*]quinolines That Induce Interferon Production. *J. Med. Chem.*, **2005**, *48*, 3481–3491.
7. Terzić, N.; Konstantinović, J.; Tot, M.; Burojević, J.; Djurković-Djaković, O.; Srbljanović, J.; Štajner, T.; Verbić, T.; Zlatović, M.; Machado, M.; Albuquerque, I. S.; Prudêncio, M.; Sciotti, R. J.; Pecic, S.; D'Alessandro, S.; Taramelli, D.; Šolaja, B. A. Reinvestigating Old Pharmacophores: Are 4-Aminoquinolines and Tetraoxanes Potential Two-Stage Antimalarials? *J. Med. Chem.* **2016**, *59*, 264–281.
8. Margolis, B. J.; Long, K. A.; Laird, D. L. T.; Ruble, J. C.; Pulley, S. R. Assembly of 4-Aminoquinolines via Palladium Catalysis: A Mild and Convenient Alternative to SNAr Methodology. *J. Org. Chem.* **2007**, *72*, 2232–2235.
9. Morrell, A.; Placzek, M. S.; Steffen, J. D.; Antony, S.; Agama, K.; Pommier, Y.; Cushman, M. Investigation of the Lactam Side Chain Length Necessary for Optimal Indenoisoquinoline Topoisomerase I Inhibition and Cytotoxicity in Human Cancer Cell Cultures. *J. Med. Chem.*, **2007**, *50*, 2040–2048.
10. Korotchenko, V.; Sathunuru, R.; Gerena, L.; Caridha, D.; Li, Q.; Kreishman-Deitrick, M.; Smith, P. L.; and Lin, A. J. Antimalarial Activity of 4-Amidinoquinoline and 10-Amidinobenzonaphthyridine Derivatives. *J. Med. Chem.* **2015**, *58*, 3411–3431.
11. Konstantinović, J.; Videnović, M.; Srbljanović, J.; Djurković-Djaković, O.; Bogoević, K.; Sciotti, R.; Šolaja, B. Antimalarials with Benzothiophene Moieties as Aminoquinoline Partners. *Molecules* **2017**, *22*, 343.
12. Antinarelli, L. M. R.; Carmo, A. M. L.; Pavan, F. R.; Leite, C. Q. F.; Da Silva, A. D.; Coimbra, E. S.; Salunke, D. B. Increase of Leishmanicidal and Tubercular Activities Using Steroids Linked to Aminoquinoline. *Org. Med. Chem. Lett.* **2012**, *2*:16.
13. Konstantinović, J.; Kiris, E.; Kota, K.; Kugelman-Tonos, J.; Videnović, M.; Cazares, L. H.; Terzić, N.; Verbić, T. Ž.; Andjelković, B.; Duplantier, A. J.; Bavari, S.; Šolaja, B. A. New Steroidal 4-Aminoquinolines Antagonize Botulinum Neurotoxin Serotype A in Mouse Embryonic Stem Cell Derived Motor Neurons in Post-intoxication Model. *J. Med. Chem.* **2018**, *61*, 1595–1608.
14. Šolaja, B. A.; Opsenica, D.; Smith, K. S.; Milhous, W. K.; Terzic, N.; Opsenica, I.; Burnett, J. C.; Nuss, J.; Gussio, R.; Bavari, S. Novel 4-Aminoquinolines Active against Chloroquine-Resistant and Sensitive *P. falciparum* Strains that also Inhibit Botulinum Serotype A. *J. Med. Chem.* **2008**, *51*, 4388–4391.
15. Marković, O. S.; Cvijetić, I. N.; Zlatović, M. V.; Opsenica, I. M.; Konstantinović, J. M.; Terzić Jovanović, N. V.; Šolaja, B. A.; Verbić, T. Ž. Human Serum Albumin Binding of Certain Antimalarials. *Spectrochim. Acta Mol. Biomol. Spectrosc.* **2018**, *192*, 128–139.



## Supporting Information - II

### **Novel aminoquinoline derivatives significantly reduce parasite load in *Leishmania infantum* infected mice**

Jelena Konstantinović<sup>¶</sup>, Milica Videnović<sup>#</sup>, Stefania Orsini<sup>†</sup>, Katarina Bogojević<sup>¶</sup>, Sarah D'Alessandro<sup>¥</sup>, Diletta Scaccabarozzi<sup>Ψ</sup>, Nataša Terzić Jovanović<sup>∇</sup>, Luigi Gradoni<sup>†</sup>, Nicoletta Basilico<sup>\*,¥</sup>, Bogdan A. Šolaja<sup>\*,¶,§</sup>

<sup>¶</sup> University of Belgrade, Faculty of Chemistry, Studentski trg 12-16, P.O. Box 51, 11158, Belgrade, Serbia

<sup>#</sup> Faculty of Chemistry Innovative Centre, Studentski trg 12-16, 11158 Belgrade, Serbia

<sup>∇</sup> University of Belgrade, Institute of Chemistry, Technology, and Metallurgy, Njegoševa 12, 11000 Belgrade, Serbia

<sup>§</sup> Serbian Academy of Sciences and Arts, Knez Mihailova 35, 11158 Belgrade, Serbia

<sup>¥</sup> Dipartimento di Scienze Biomediche, Chirurgiche e Odontoiatriche, Università degli Studi di Milano, Milan, Italy

<sup>Ψ</sup> Dipartimento di Scienze Farmacologiche e Biomolecolari, Università degli Studi di Milano, Milan, Italy

<sup>†</sup> Unit of Vector-borne Diseases, Istituto Superiore di Sanità, Rome, Italy

## **Table of contents**

**NMR spectra of synthesized compounds**

**II-S3-II-S16**

**HPLC analyses for purity**

**II-S17-II-S30**

## **NMR spectra of synthesized compounds**

***N'*-(7-chloro-3-nitroquinolin-4-yl)-*N,N*-diethylpropane-1,3-diamine (1)**

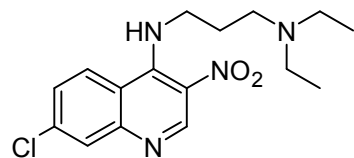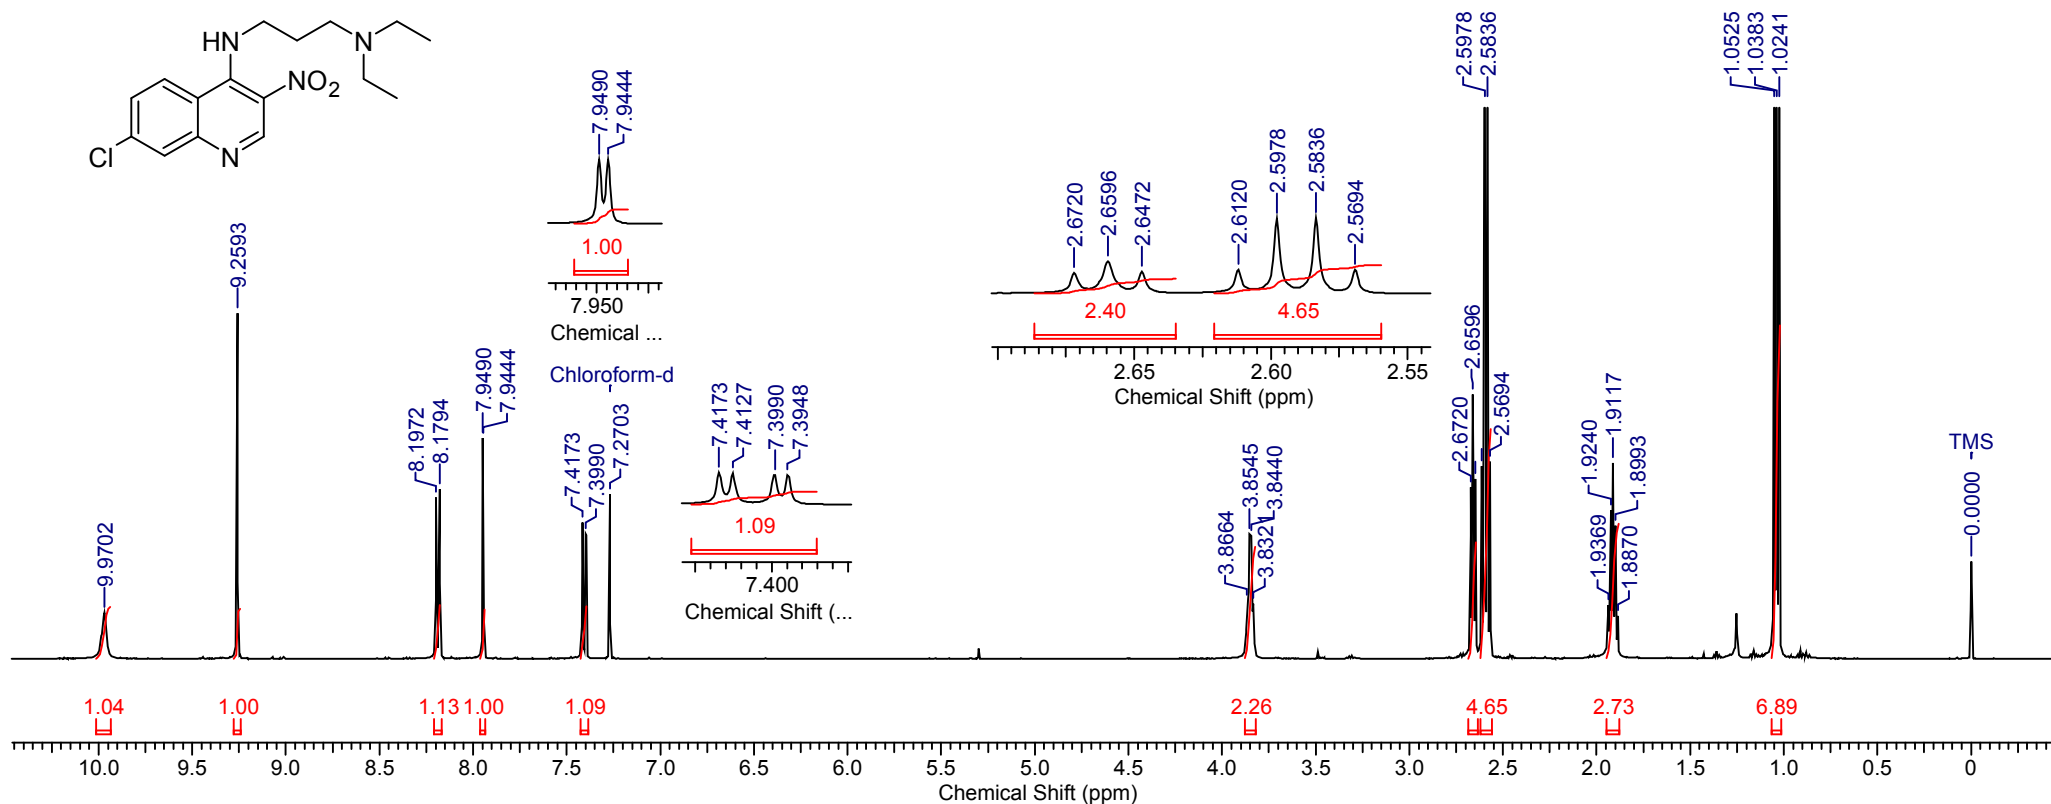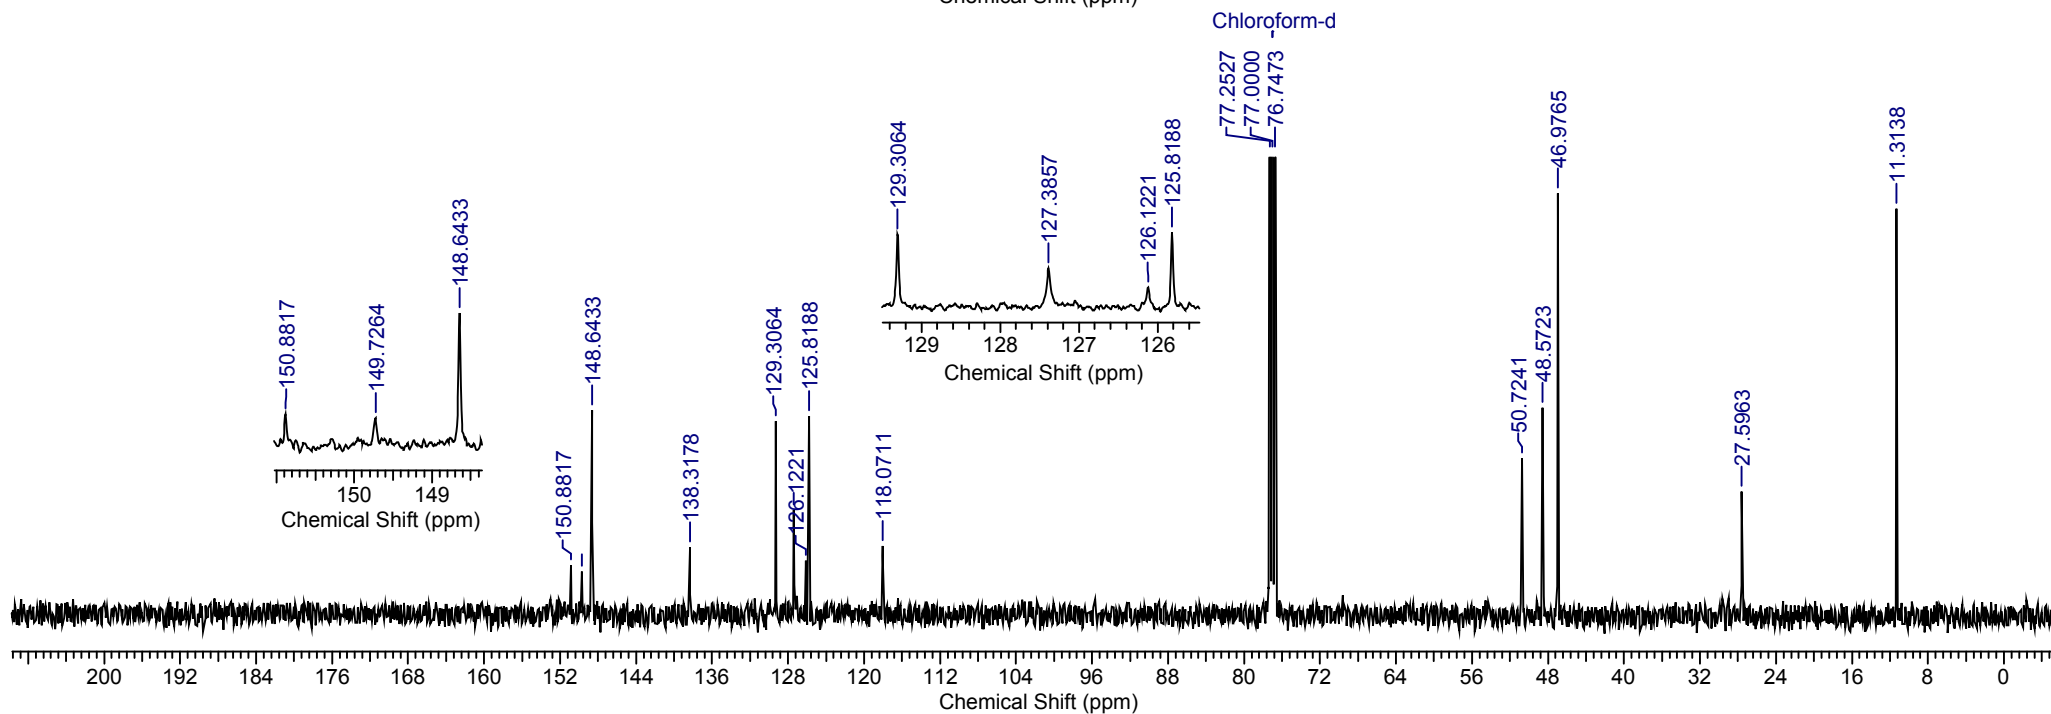

***N*<sup>4</sup>-(7-chloro-3-nitroquinolin-4-yl)-*N*<sub>1</sub>,*N*<sub>1</sub>-diethylpentane-1,4-diamine (2)**

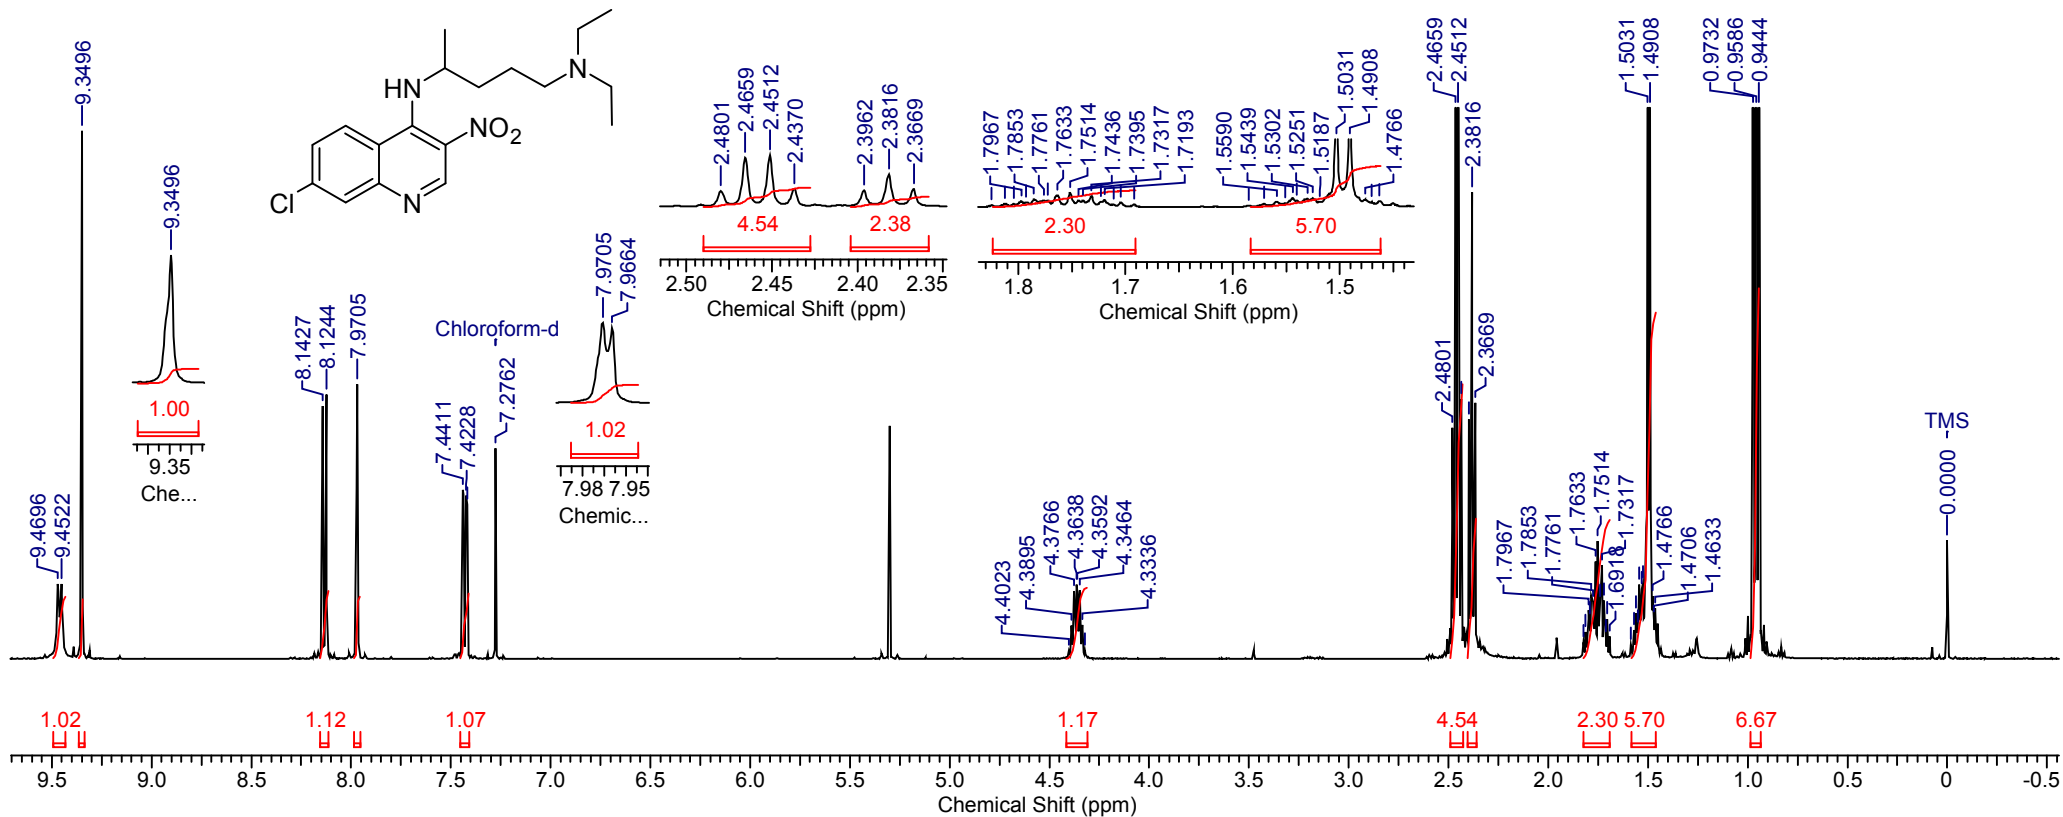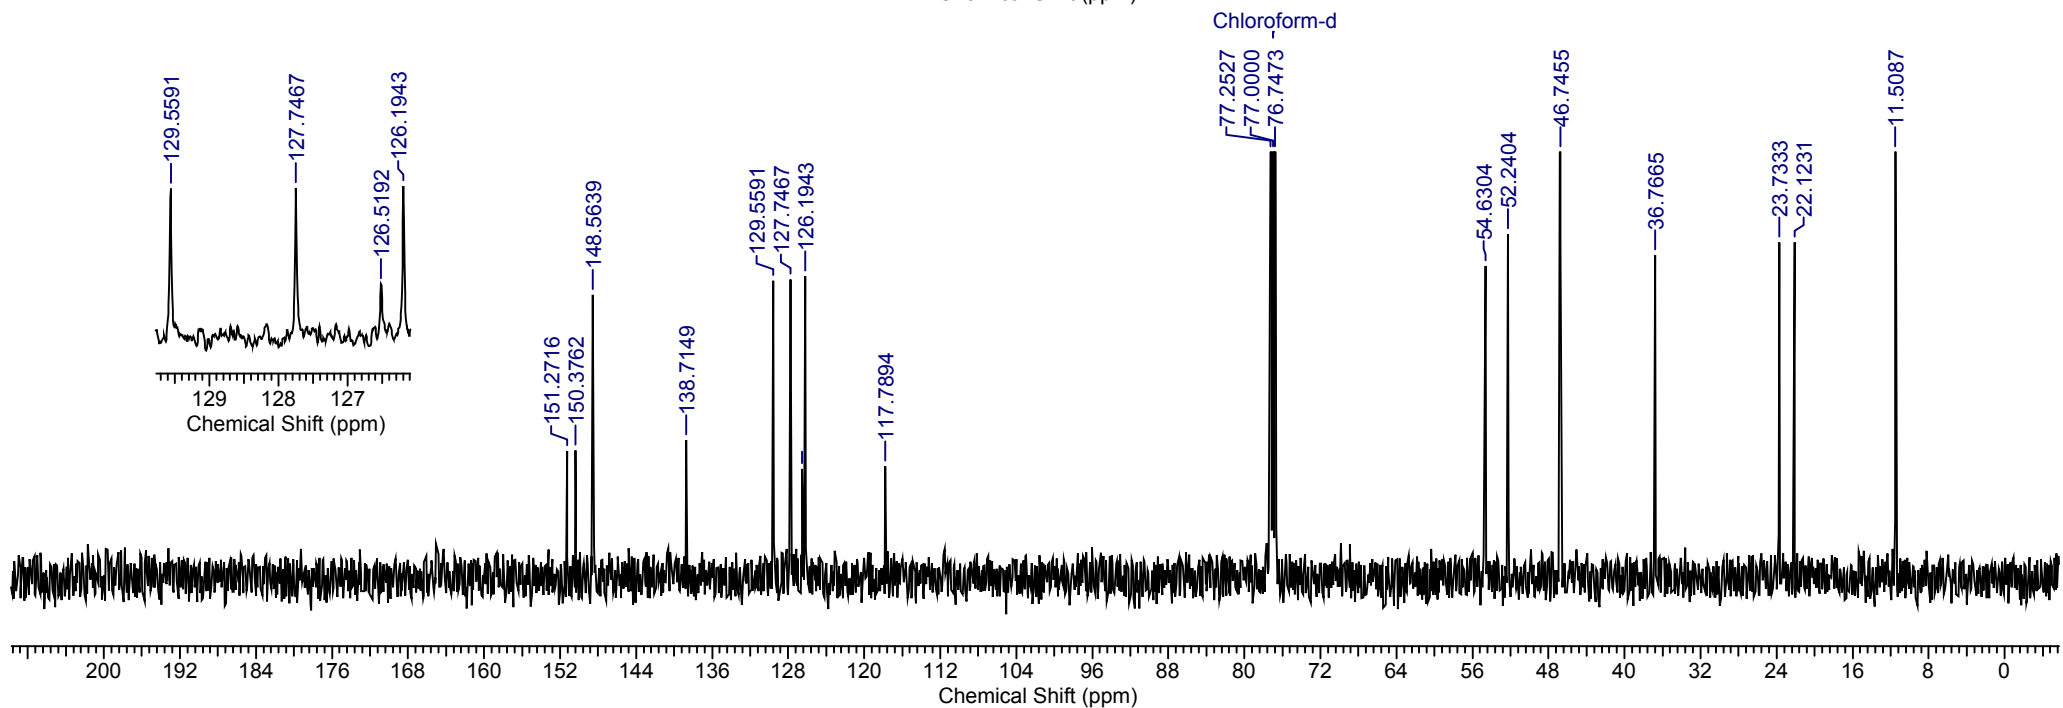

7-chloro-*N*4-[3-(diethylamino)propyl]quinoline-3,4-diamine (3)

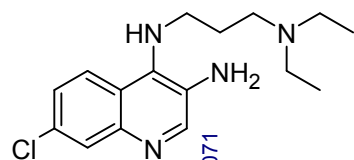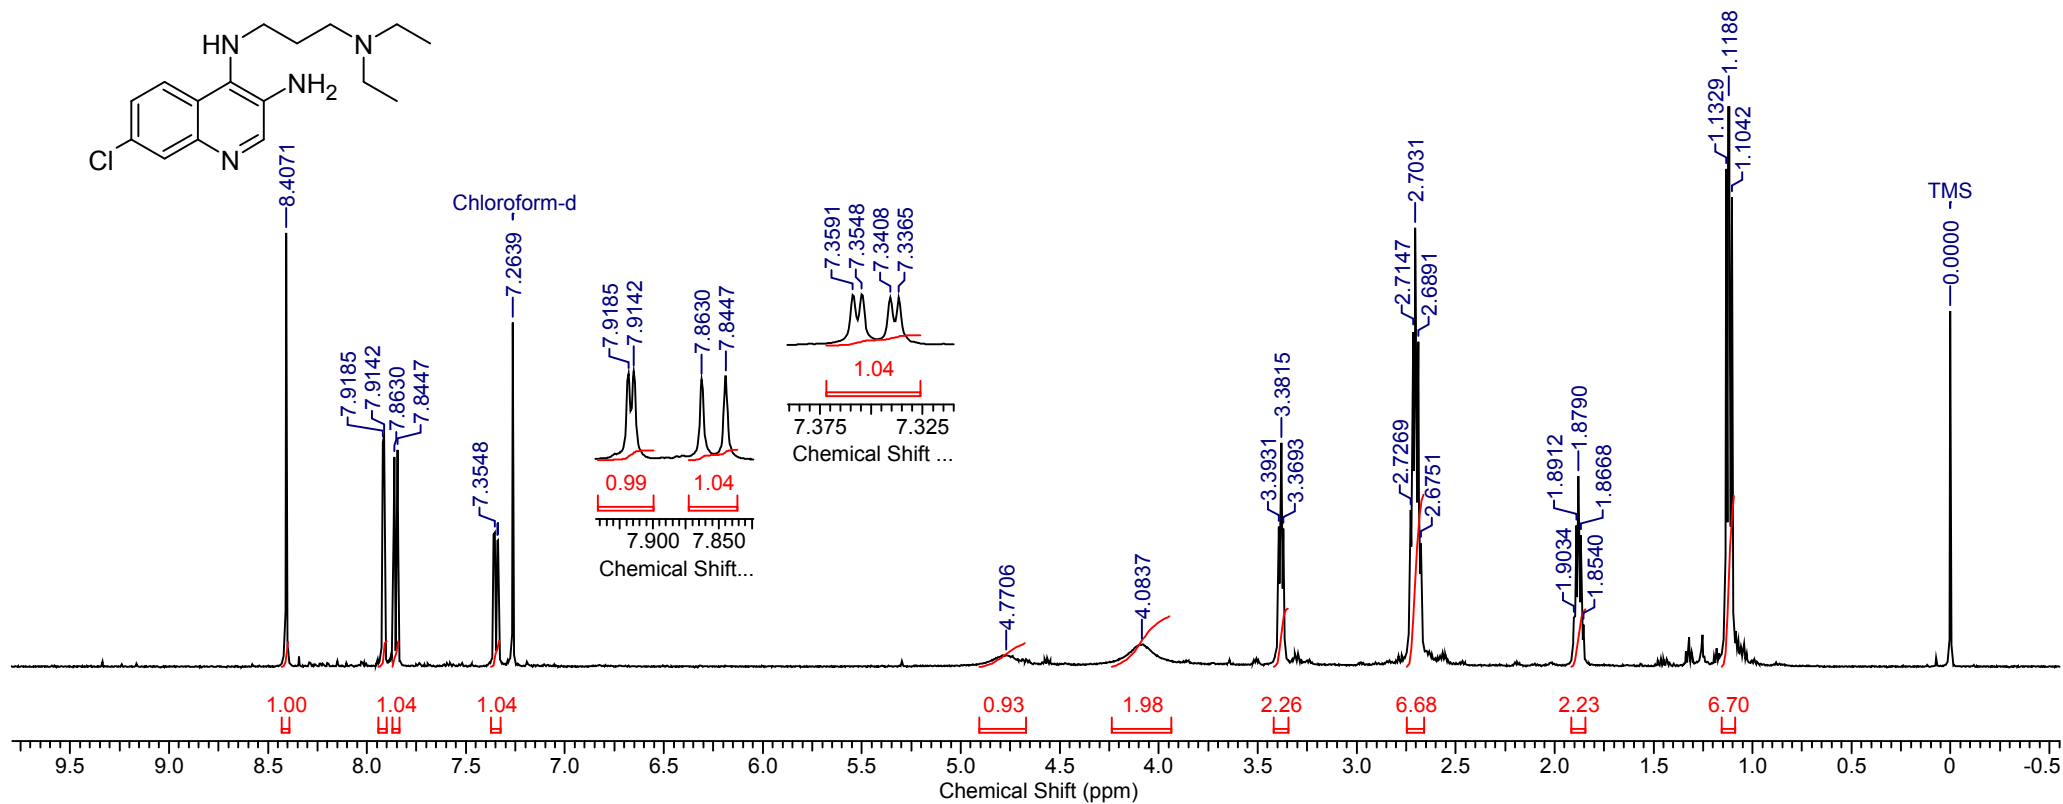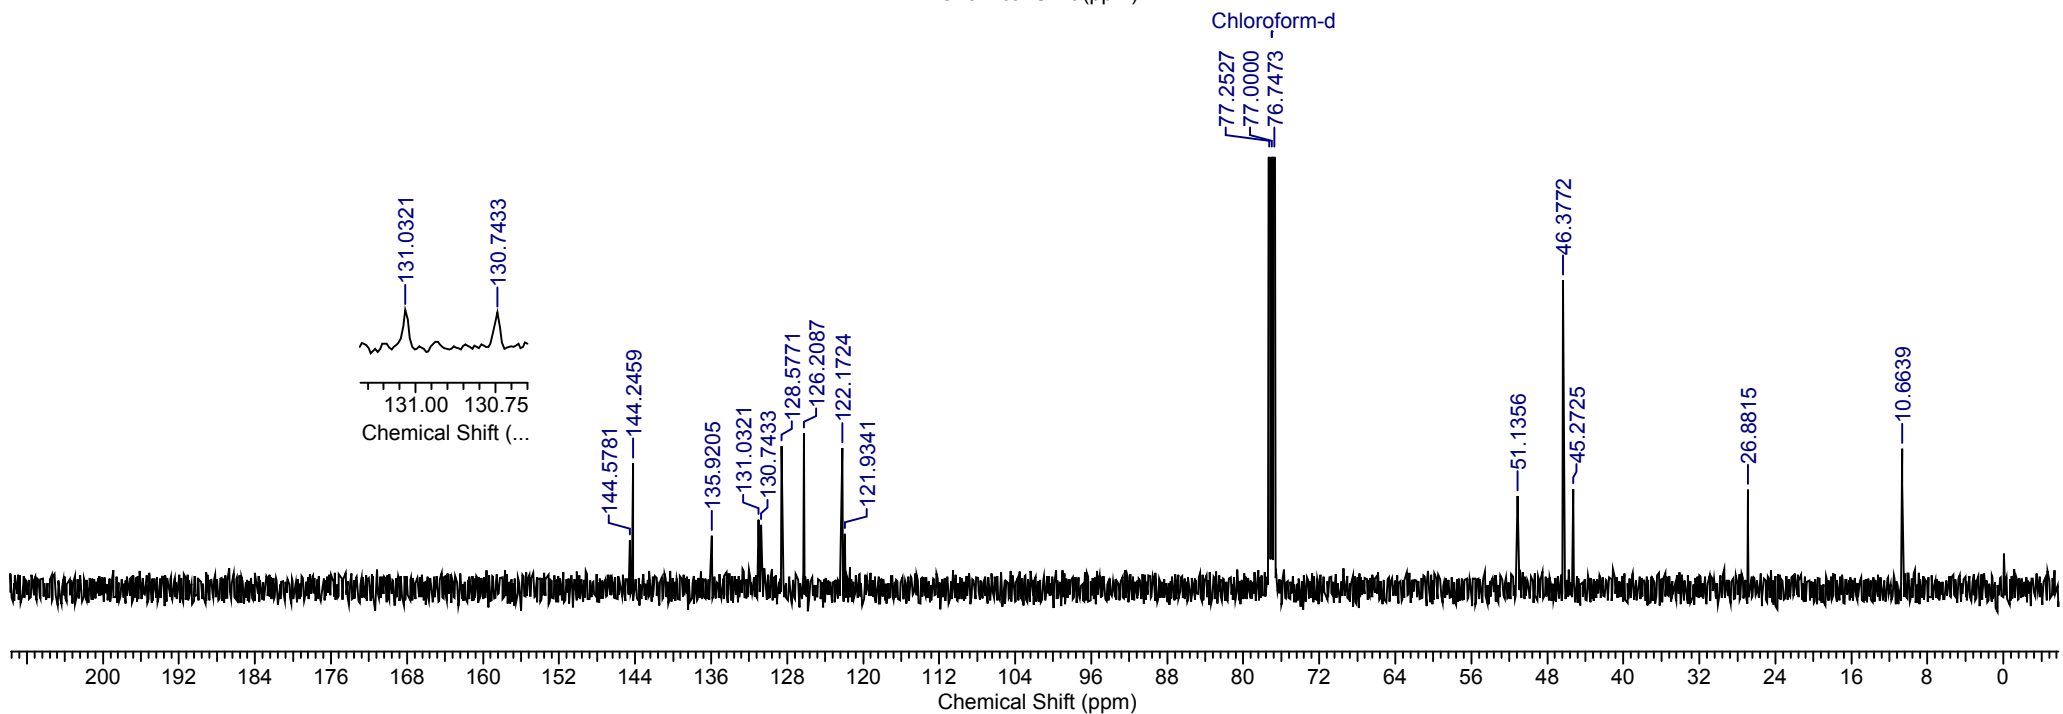

CCN(CC)CCCC(C)Nc1nc(N)c2cc(Cl)ccc2n1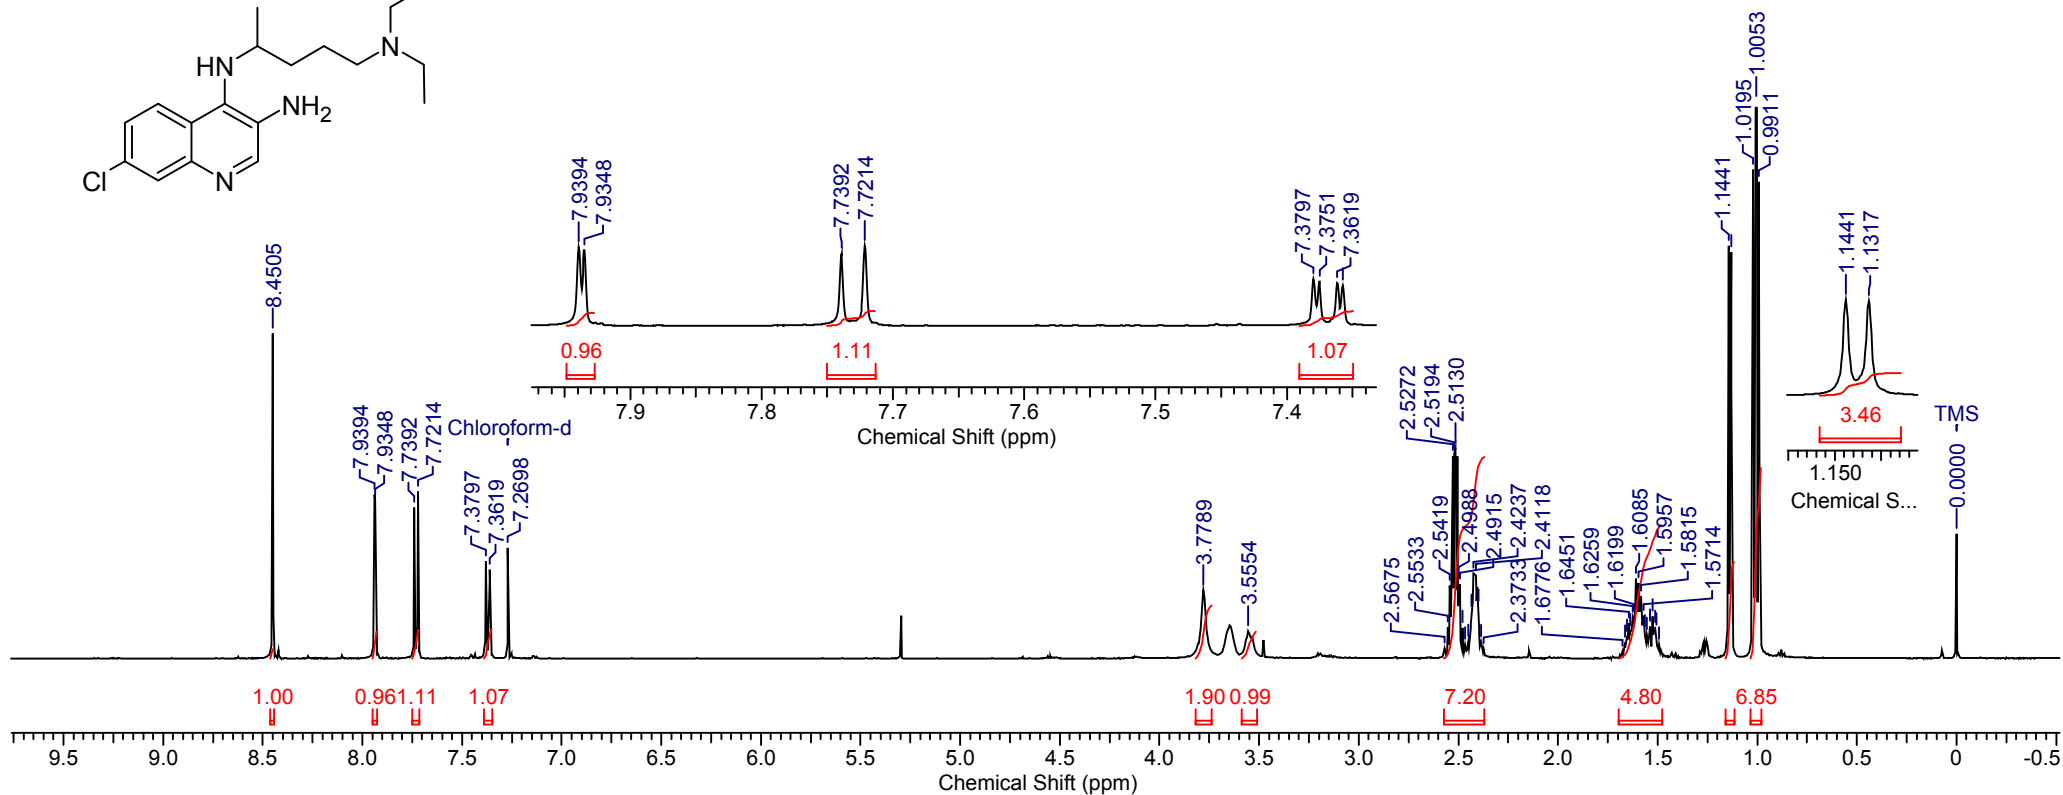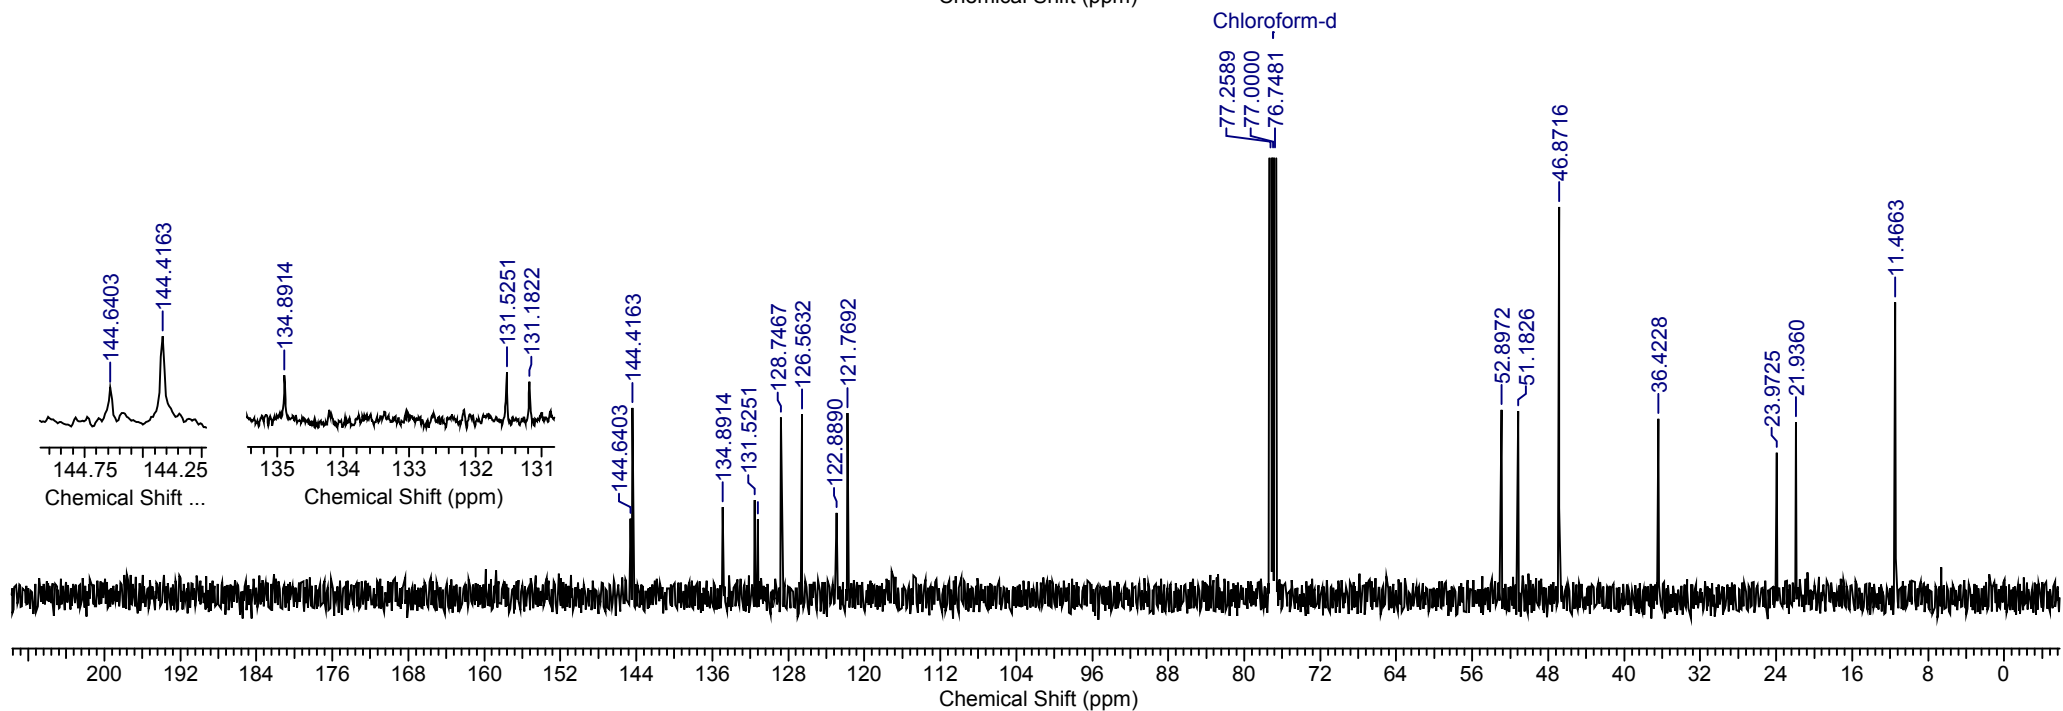

***N*-(1-adamantylmethyl)-*N'*-(7-chloro-3-nitroquinolin-4-yl)propane-1,3-diamine (5)**

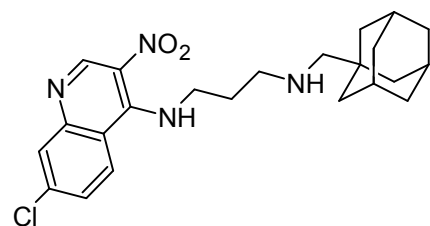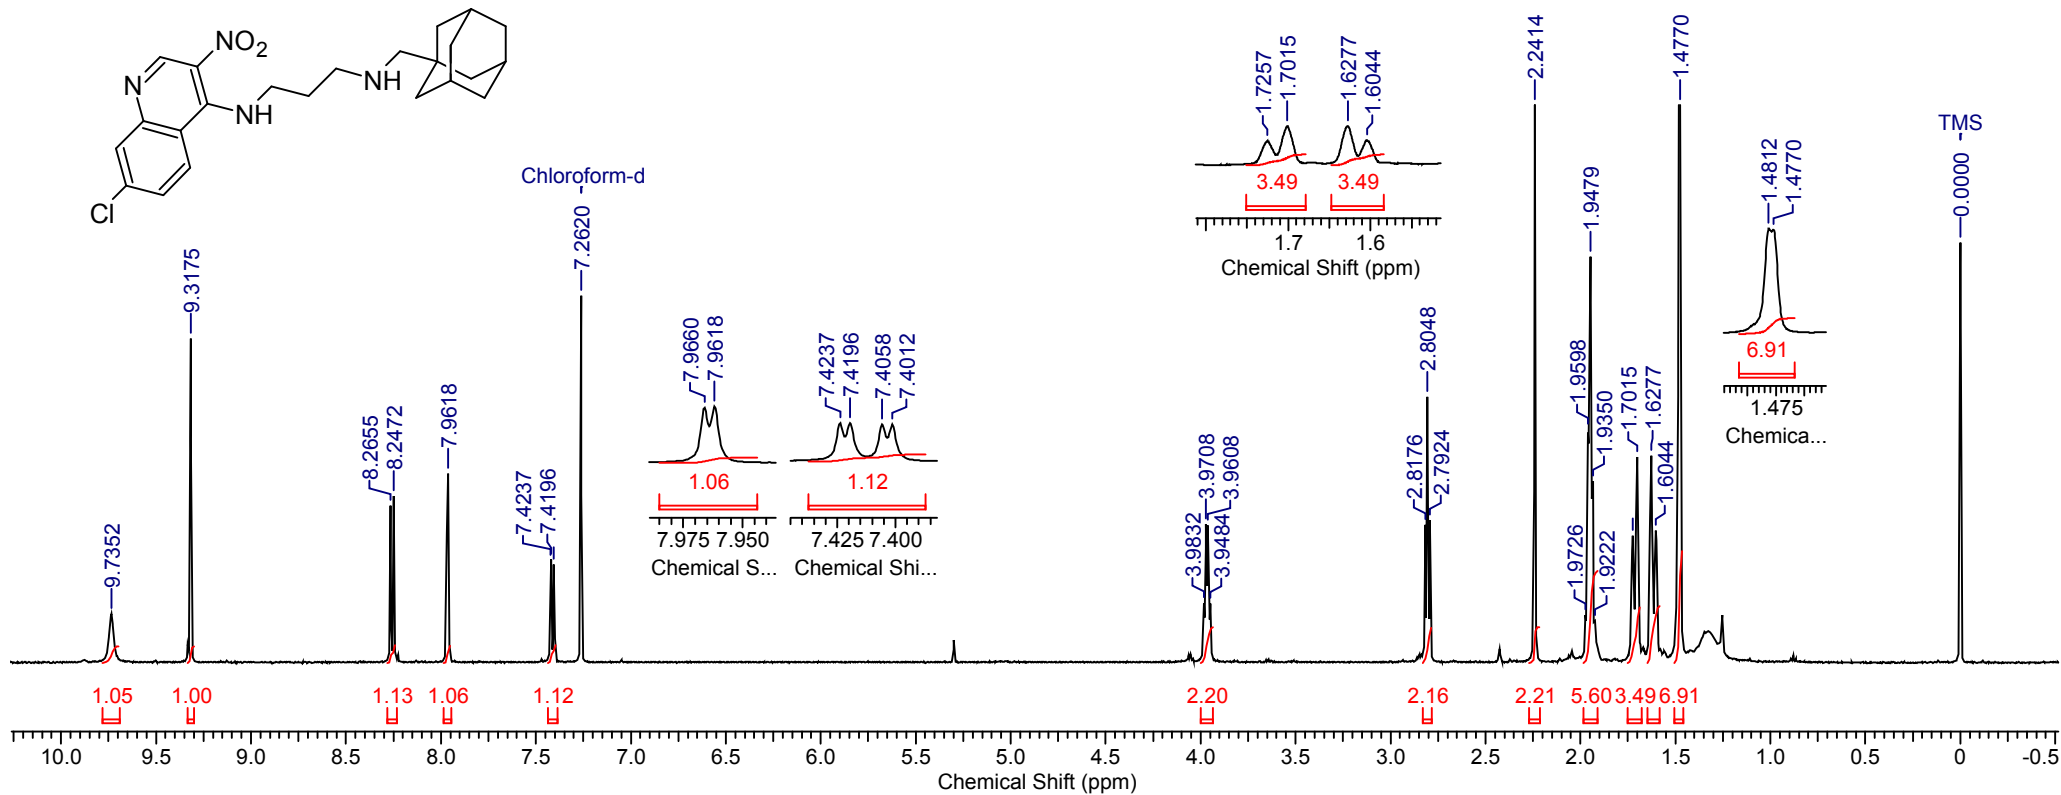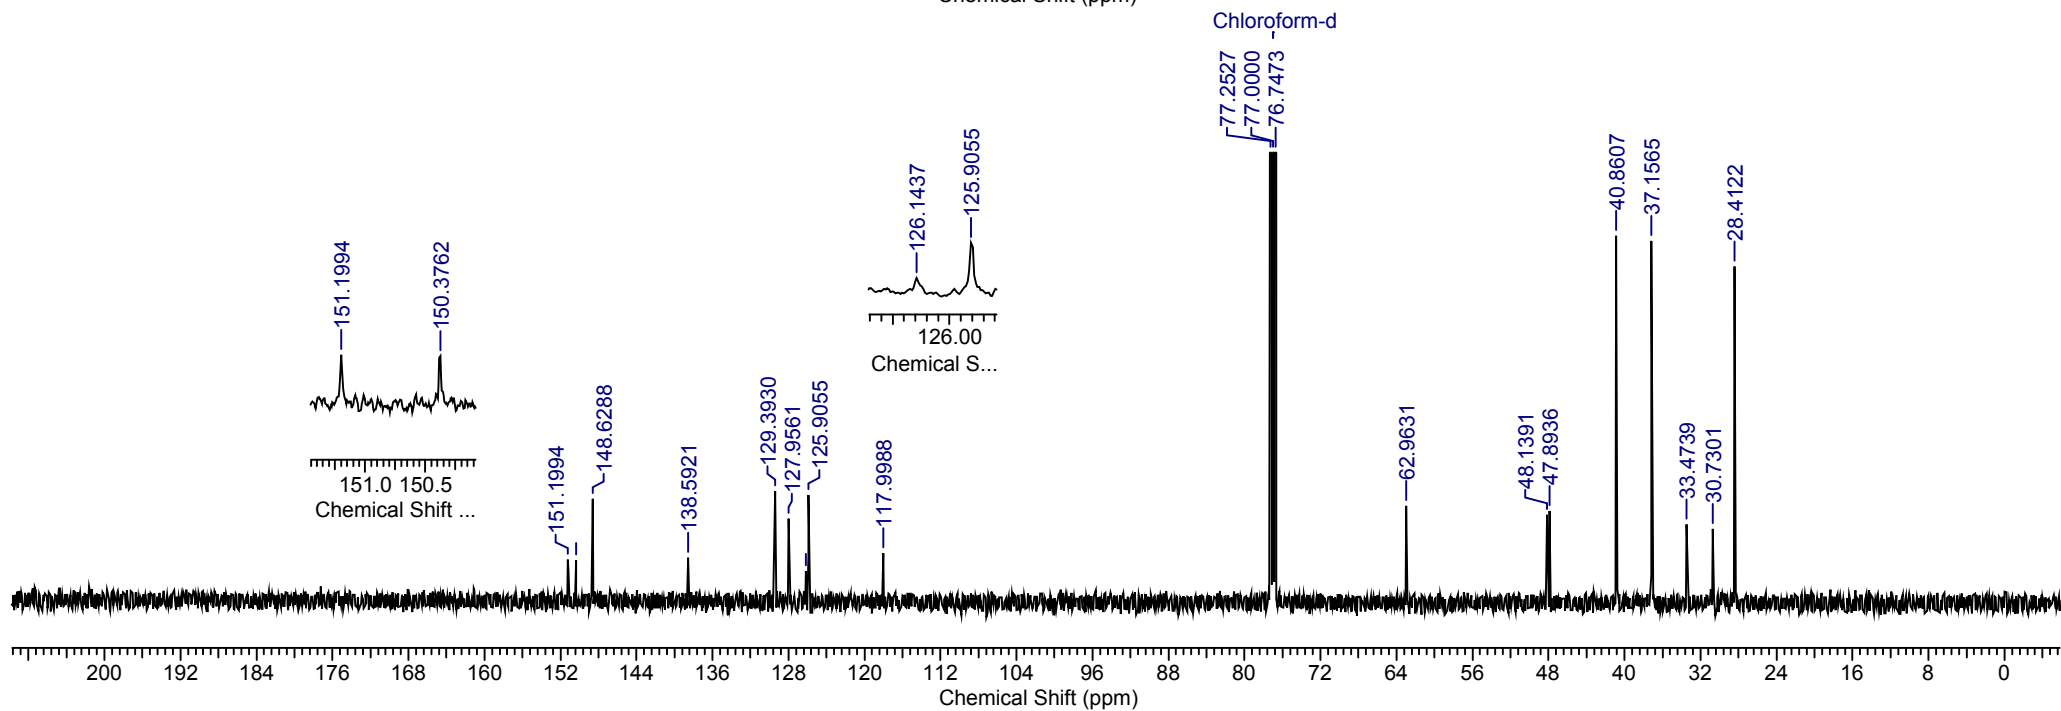



***N*<sup>4</sup>-{3-[(1-adamantylmethyl)amino]propyl}-7-chloroquinoline-3,4-diamine (6)**

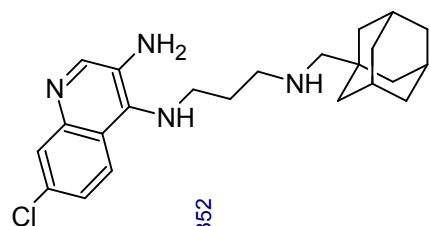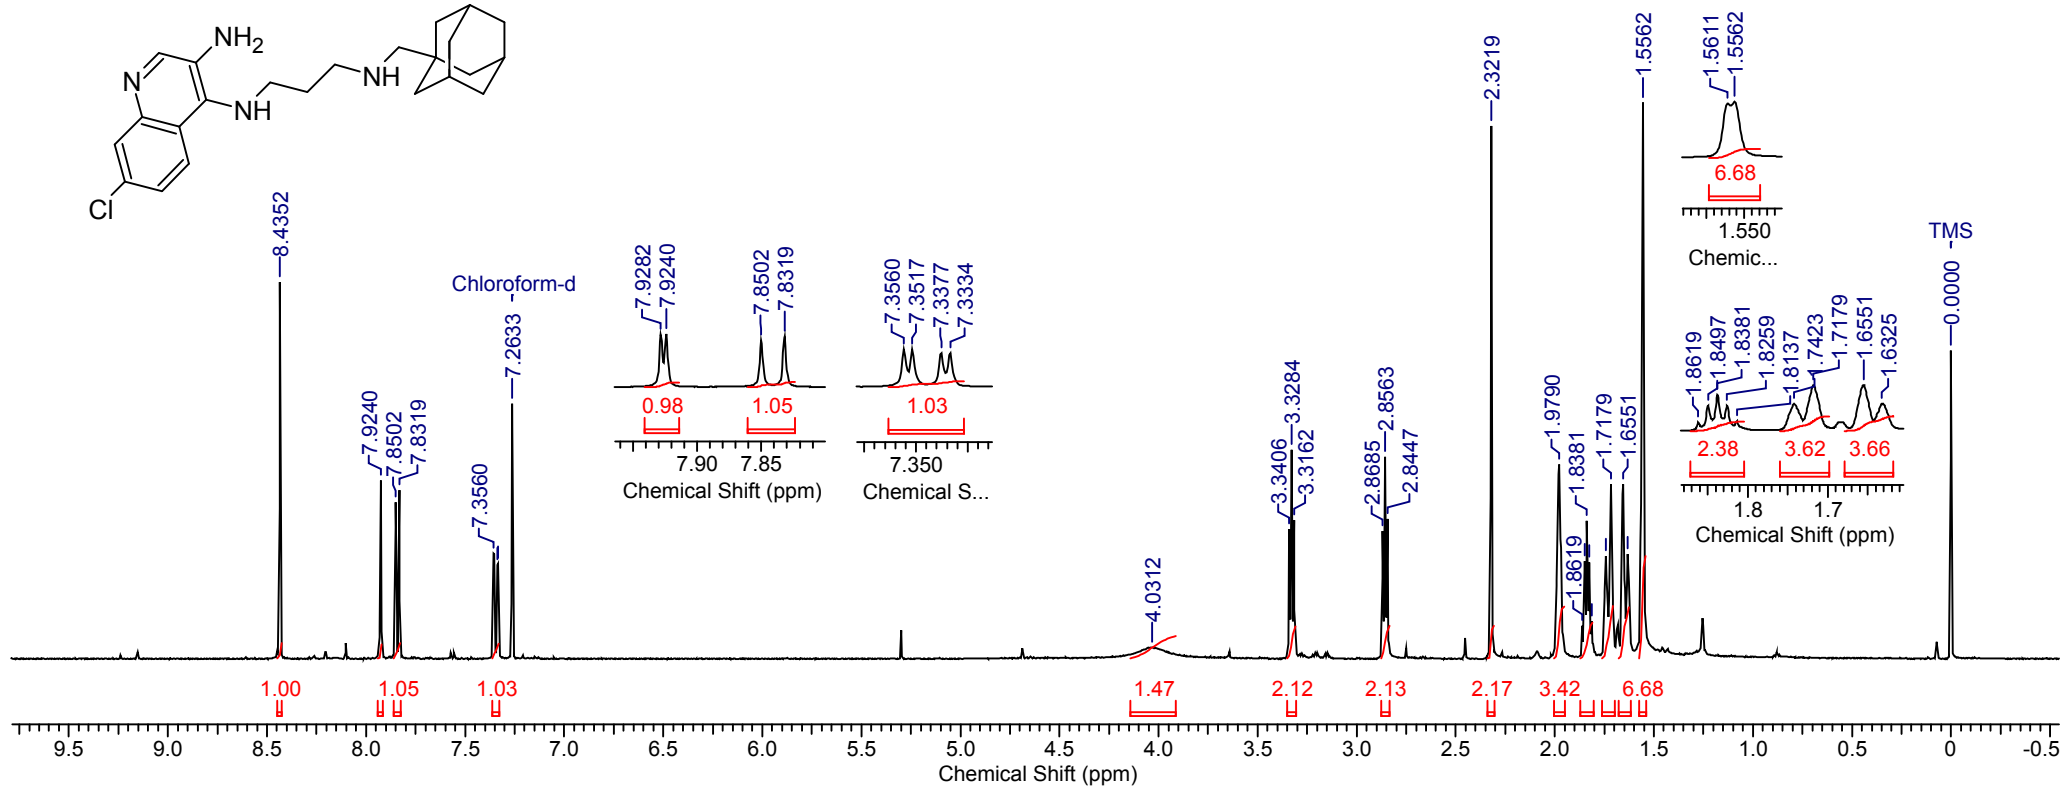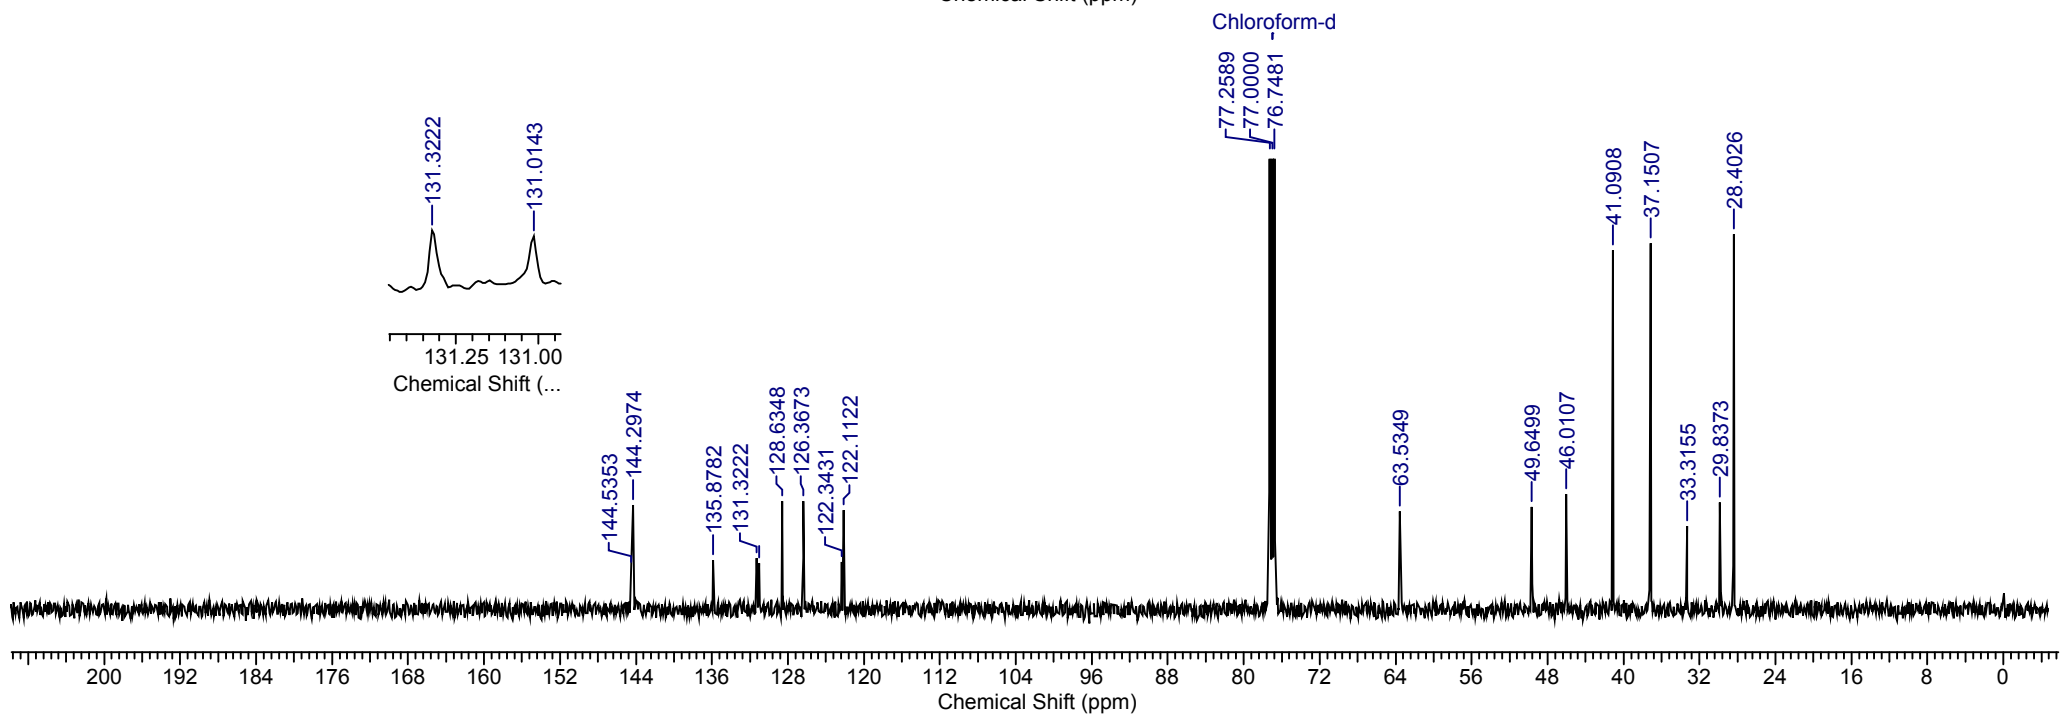

4-({3-[4-(3-{[2-(1-adamanty)ethyl]ammonio}propyl)piperazinediium-1-yl]propyl}amino)-7-chloroquinolinium tetrachloride (10)

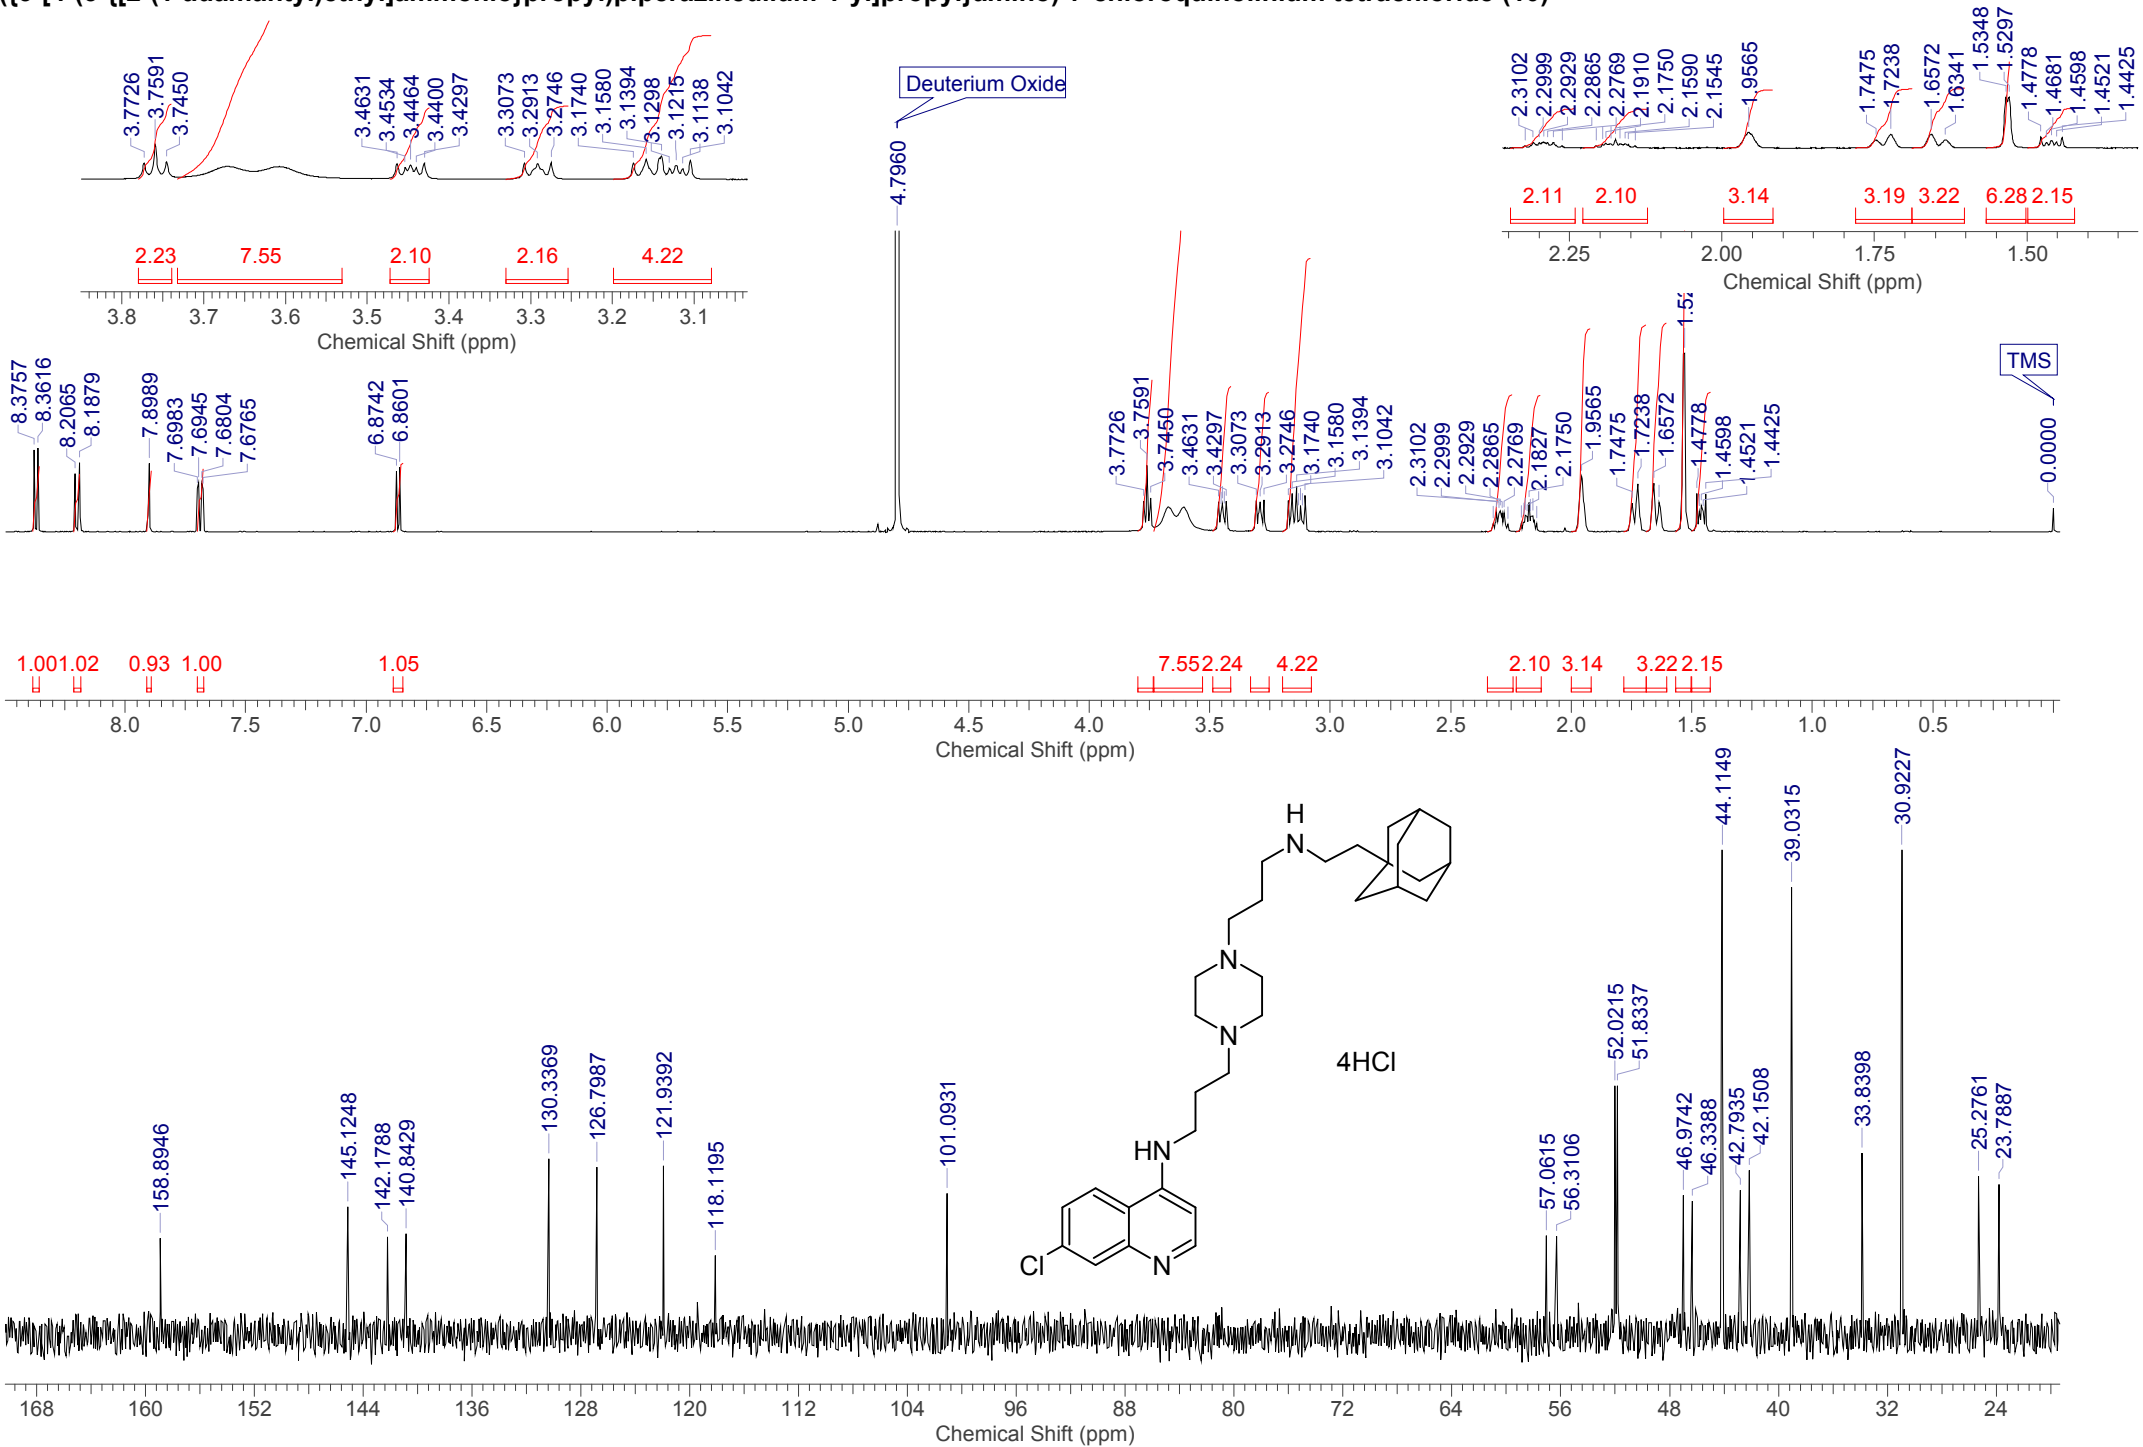

***N*-(7-chloroquinolin-4-yl)- *N'*-[4-(5-fluoro-1-benzothien-3-yl)benzyl]propane-1,3-diamine (15)**

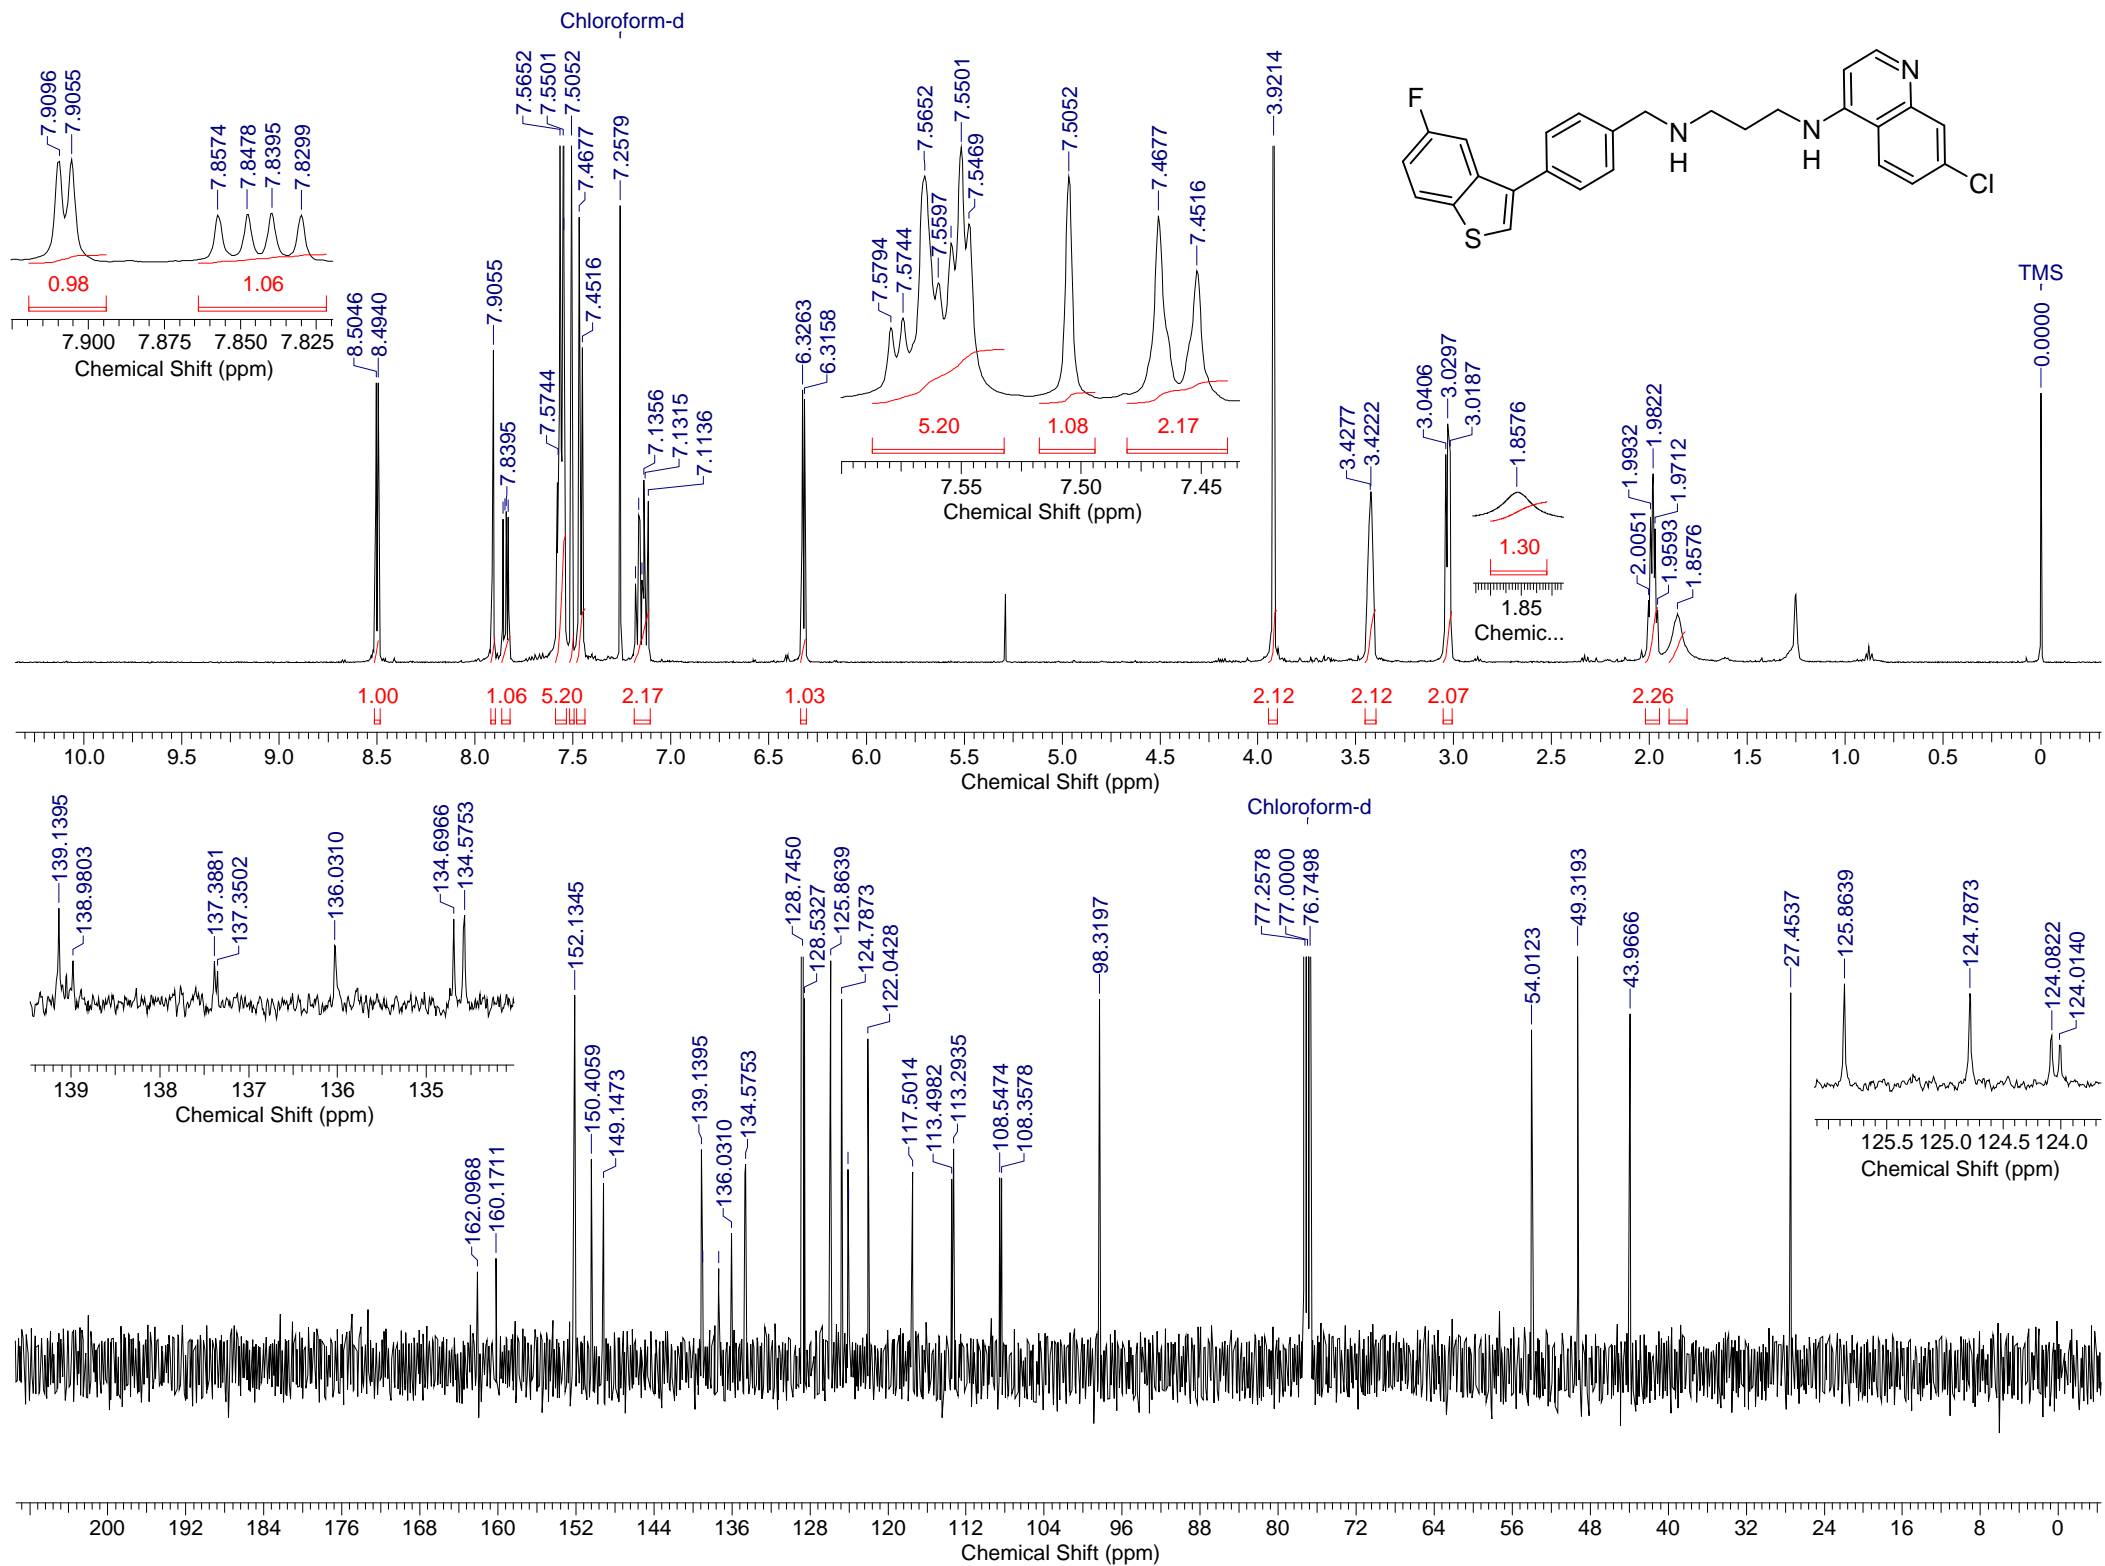

***N*-[3-(5-fluoro-1-benzothien-3-yl)prop-2-yn-1-yl]- *N'*-quinolin-4-ylbutane-1,4-diamine (21)**

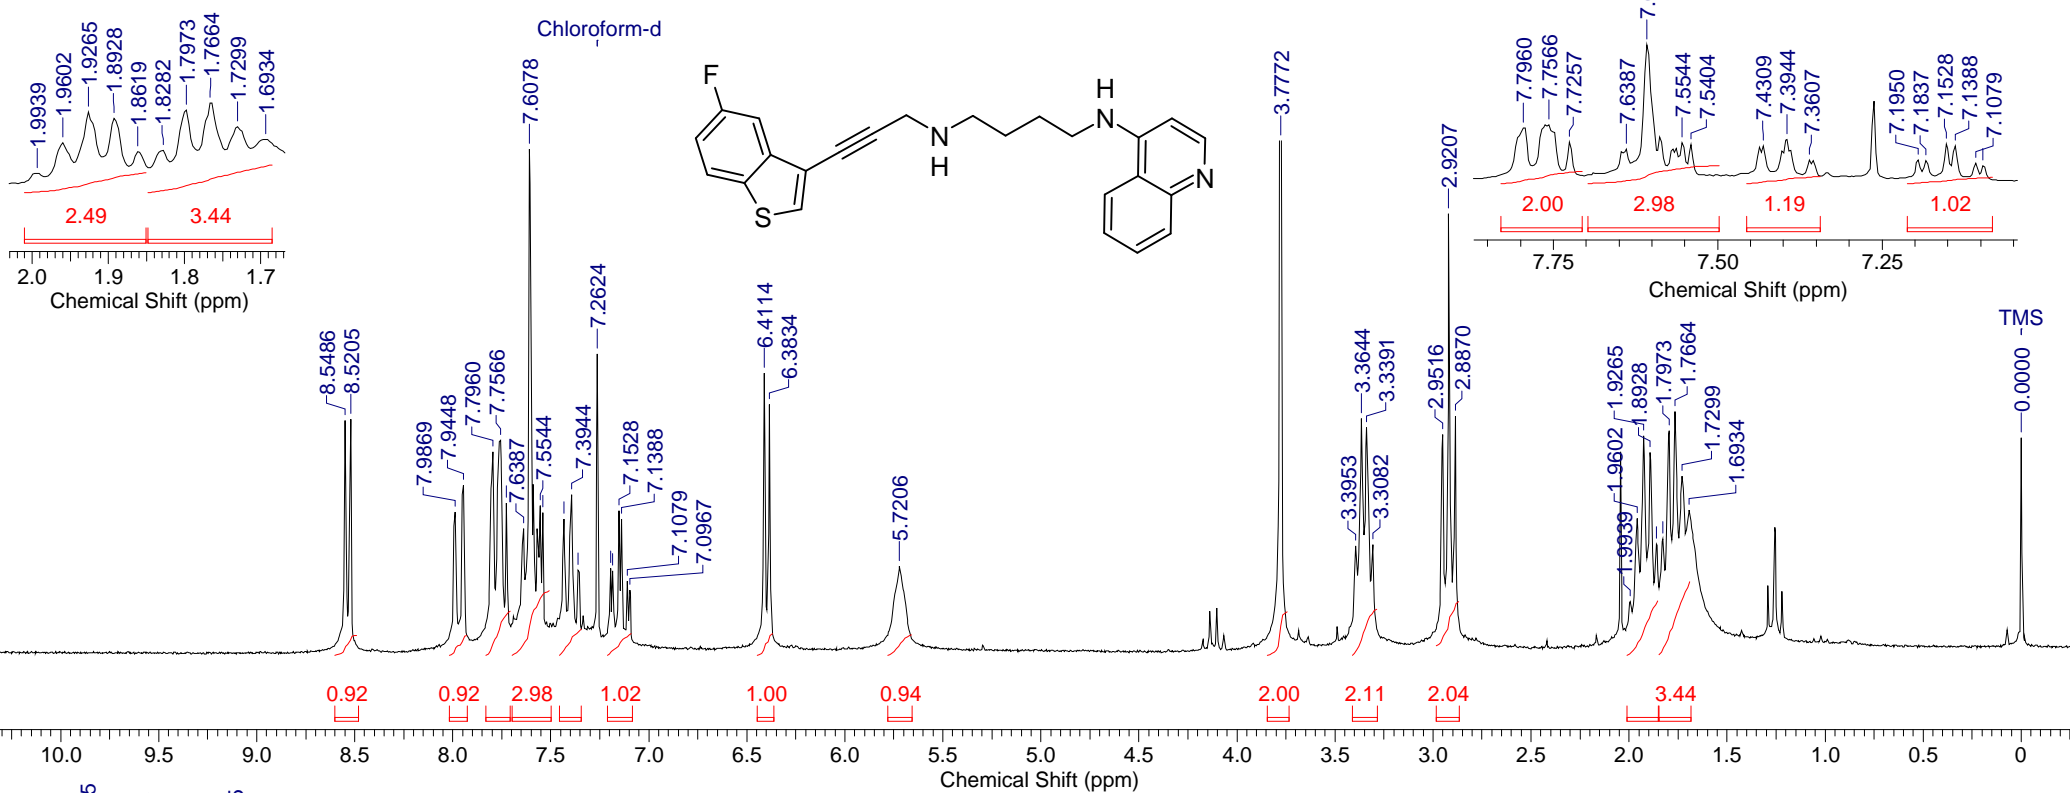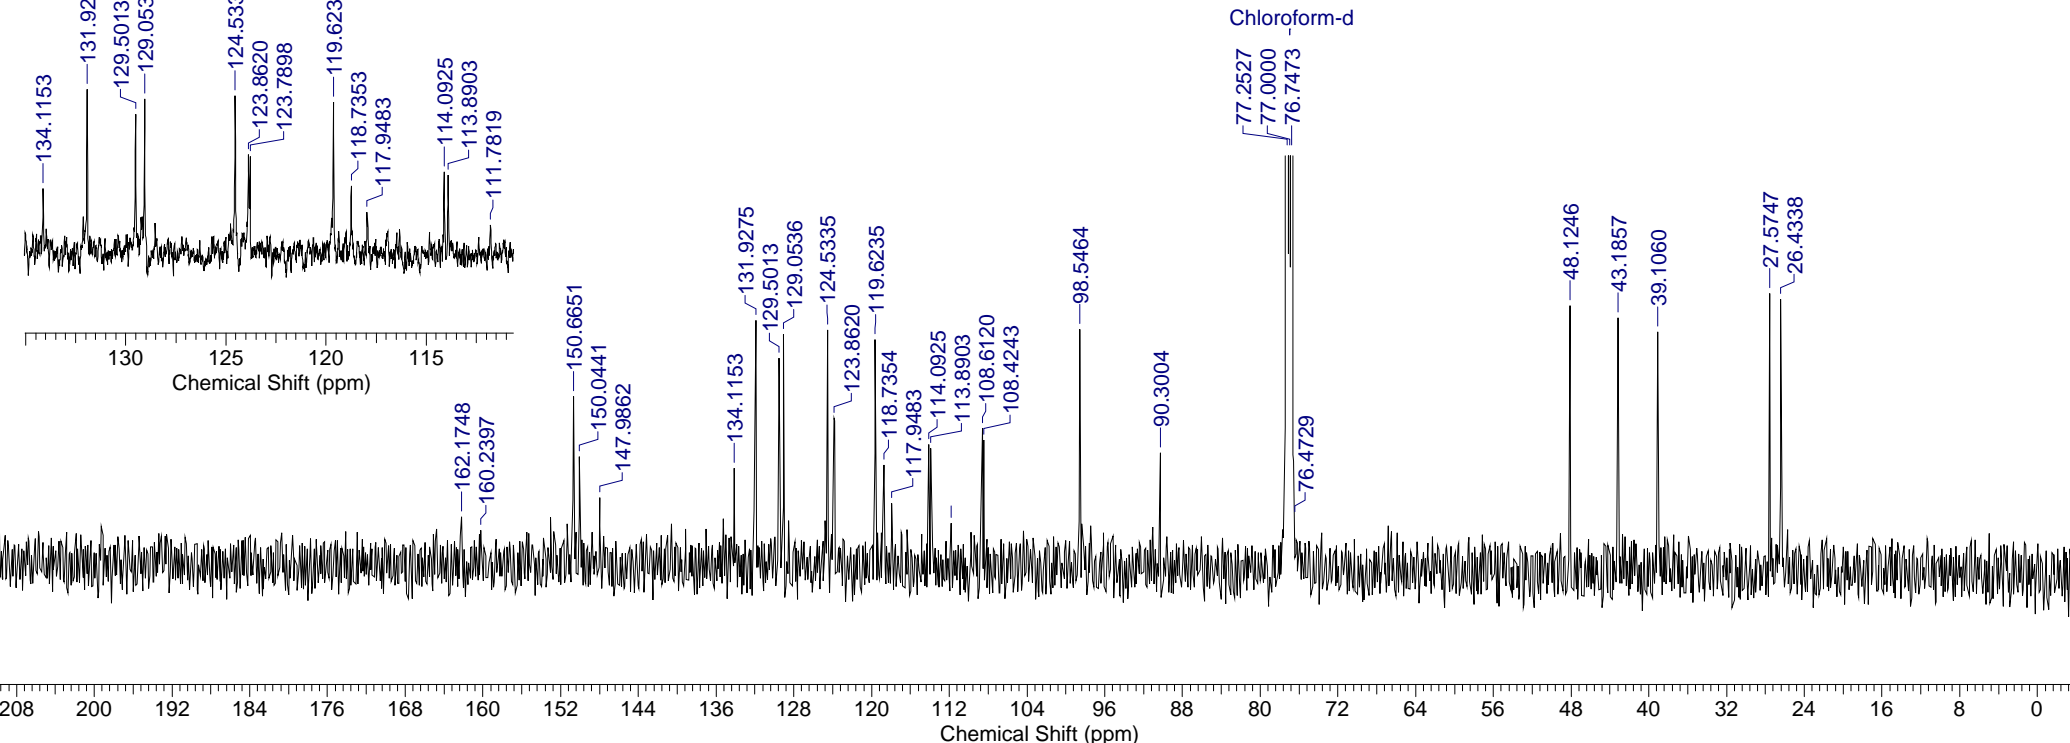

***N,N*-diethyl-*N'*-(5,6,7,8-tetrahydroquinolin-4-yl)propane-1,3-diamine (22)**

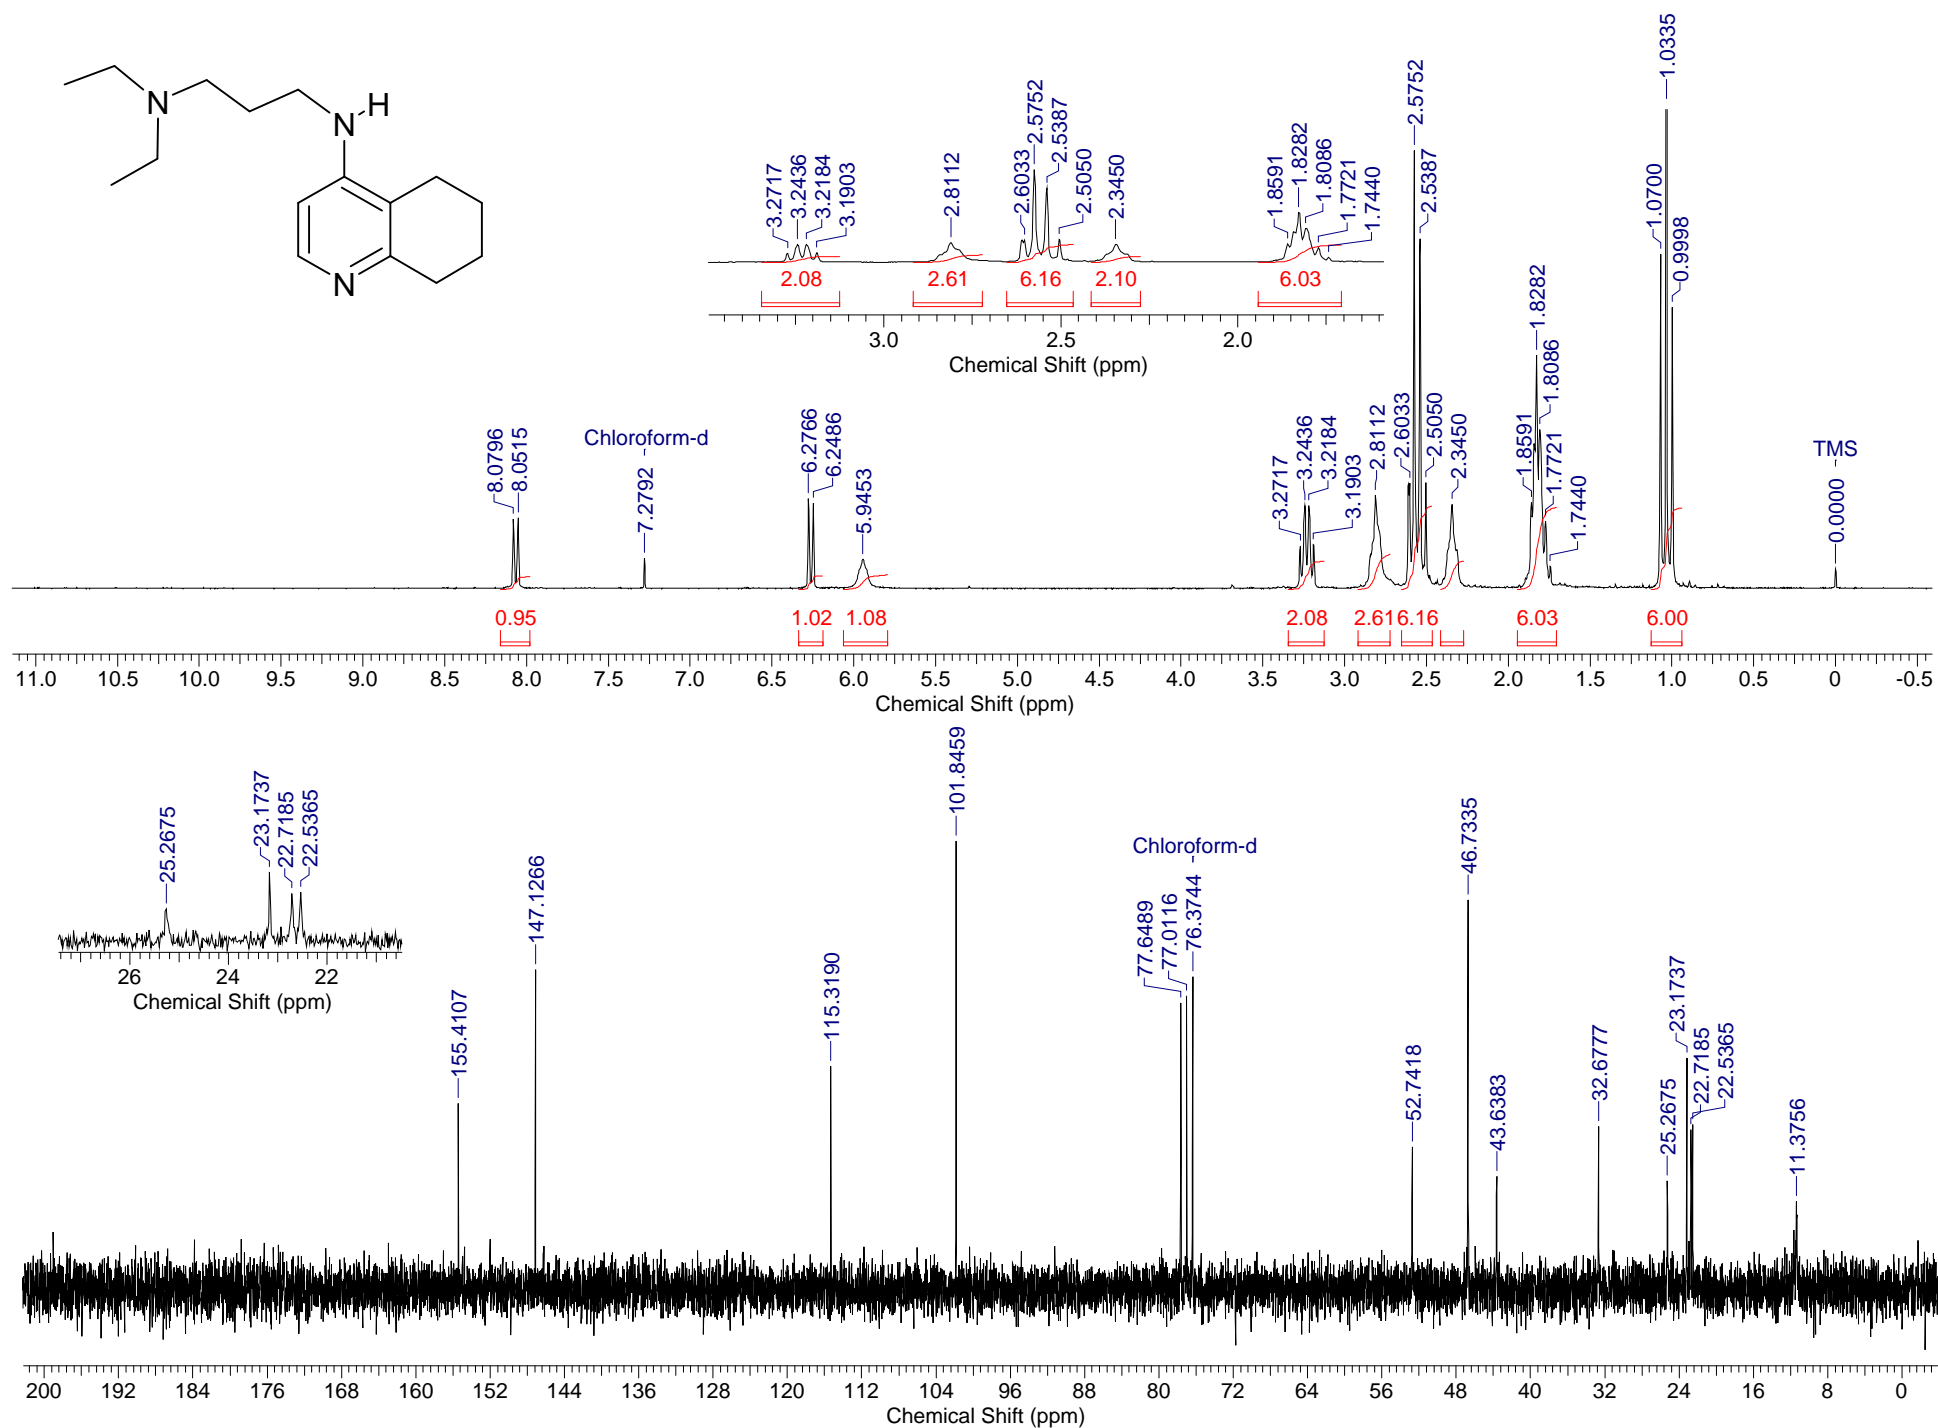

*N*,*N*-diethyl-*N*-(5,6,7,8-tetrahydroquinolin-4-yl)pentane-1,4-diamine (23)

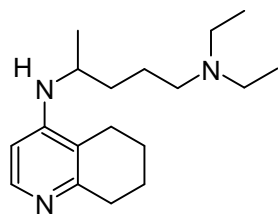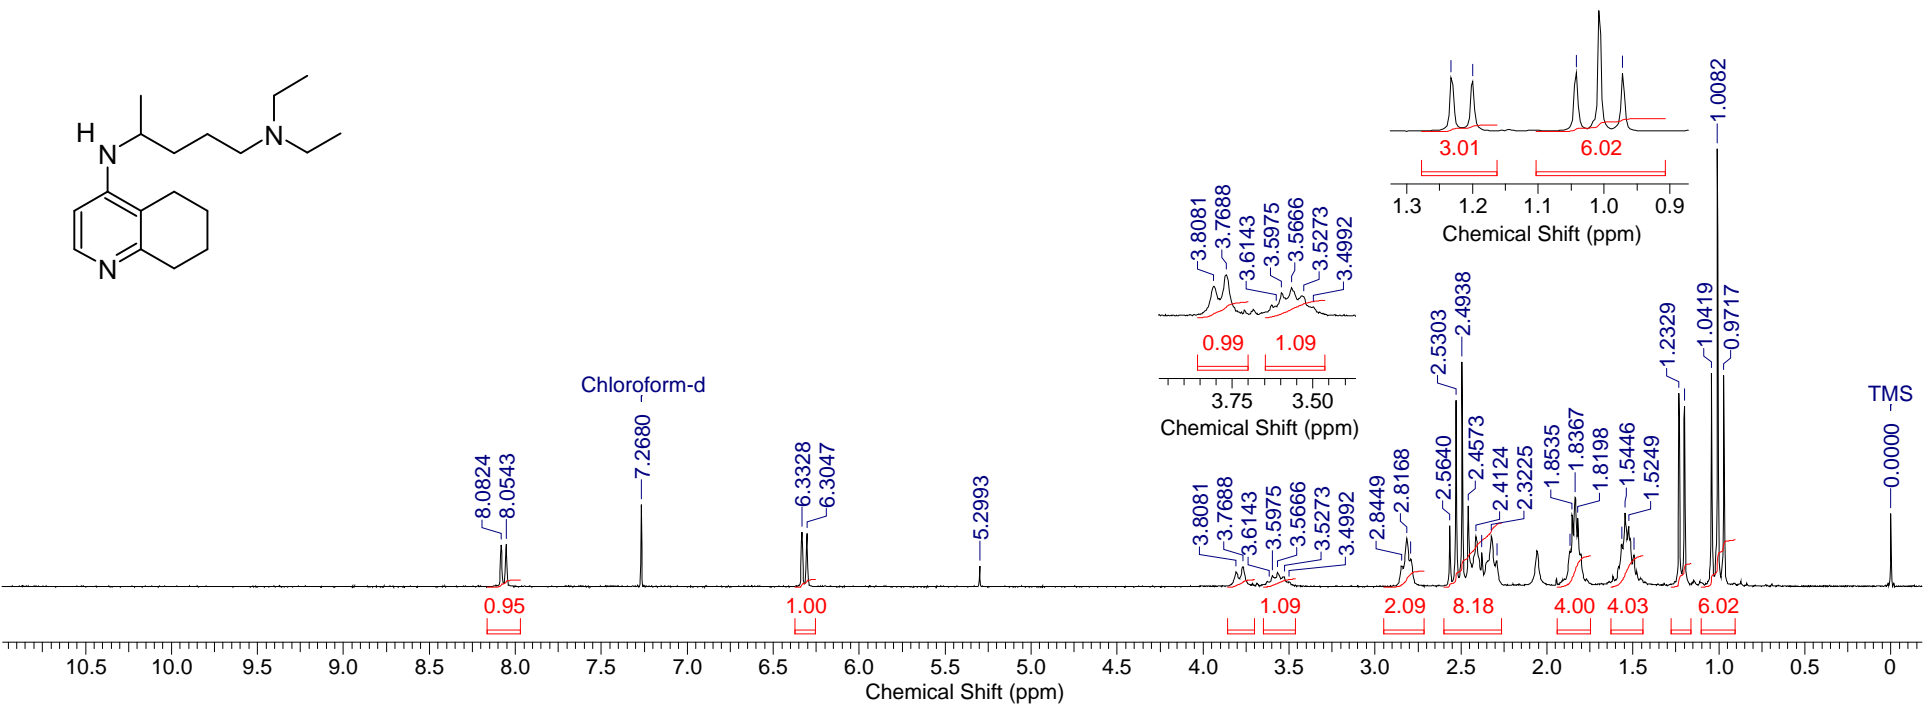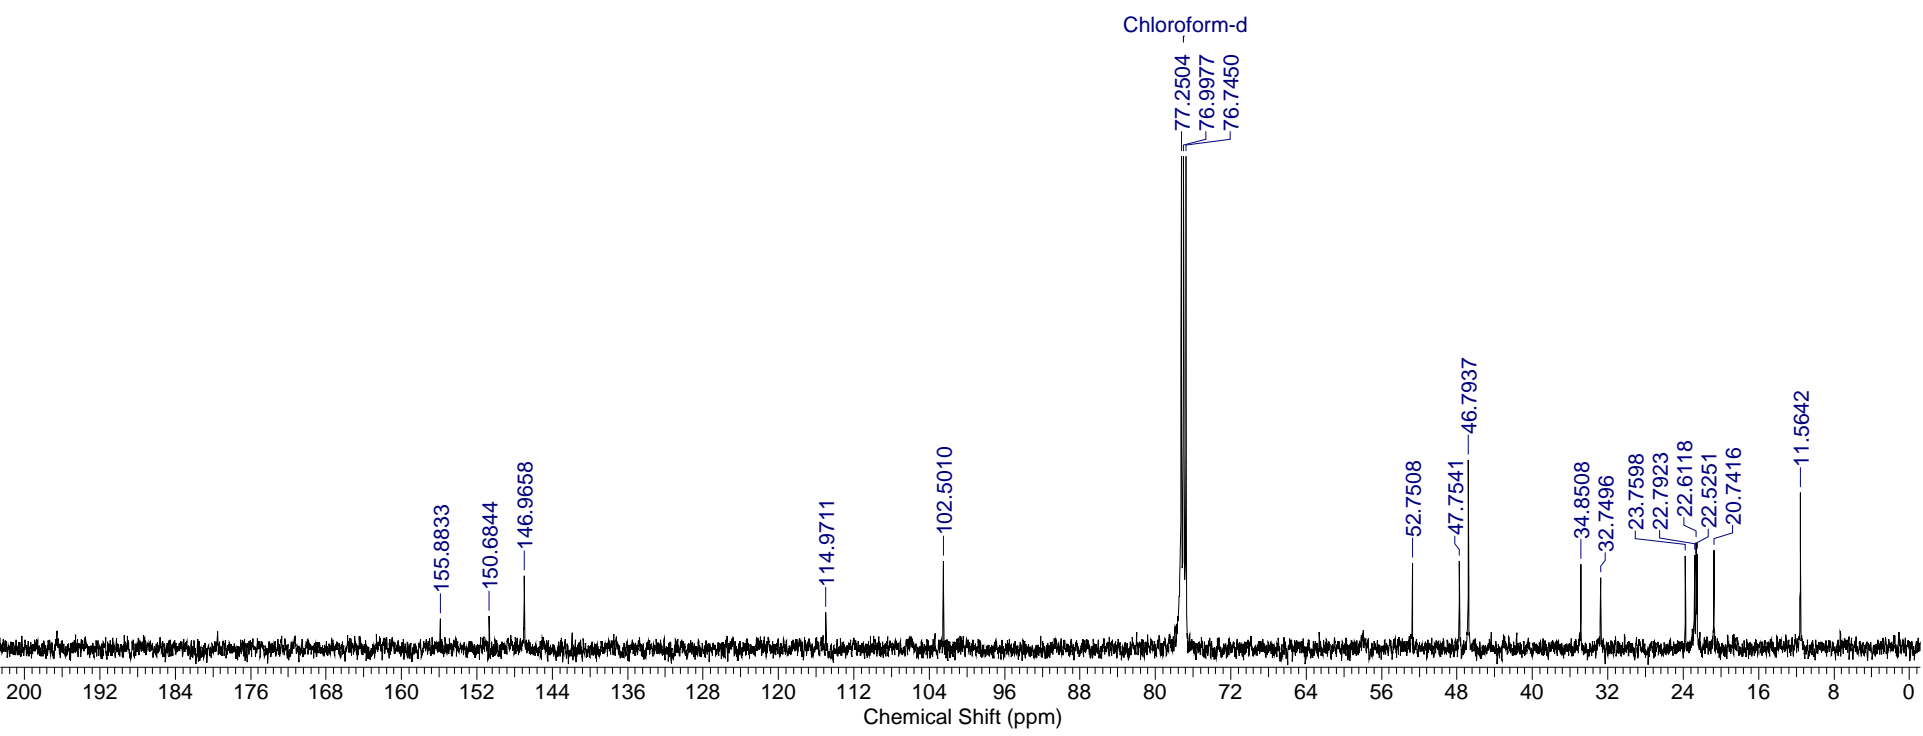

4-{5-[4-({[8-(5,6,7,8-tetrahydroquinolin-4-ylamino)octyl]amino)methyl}phenyl]-2-thienyl}benzonitrile (24)

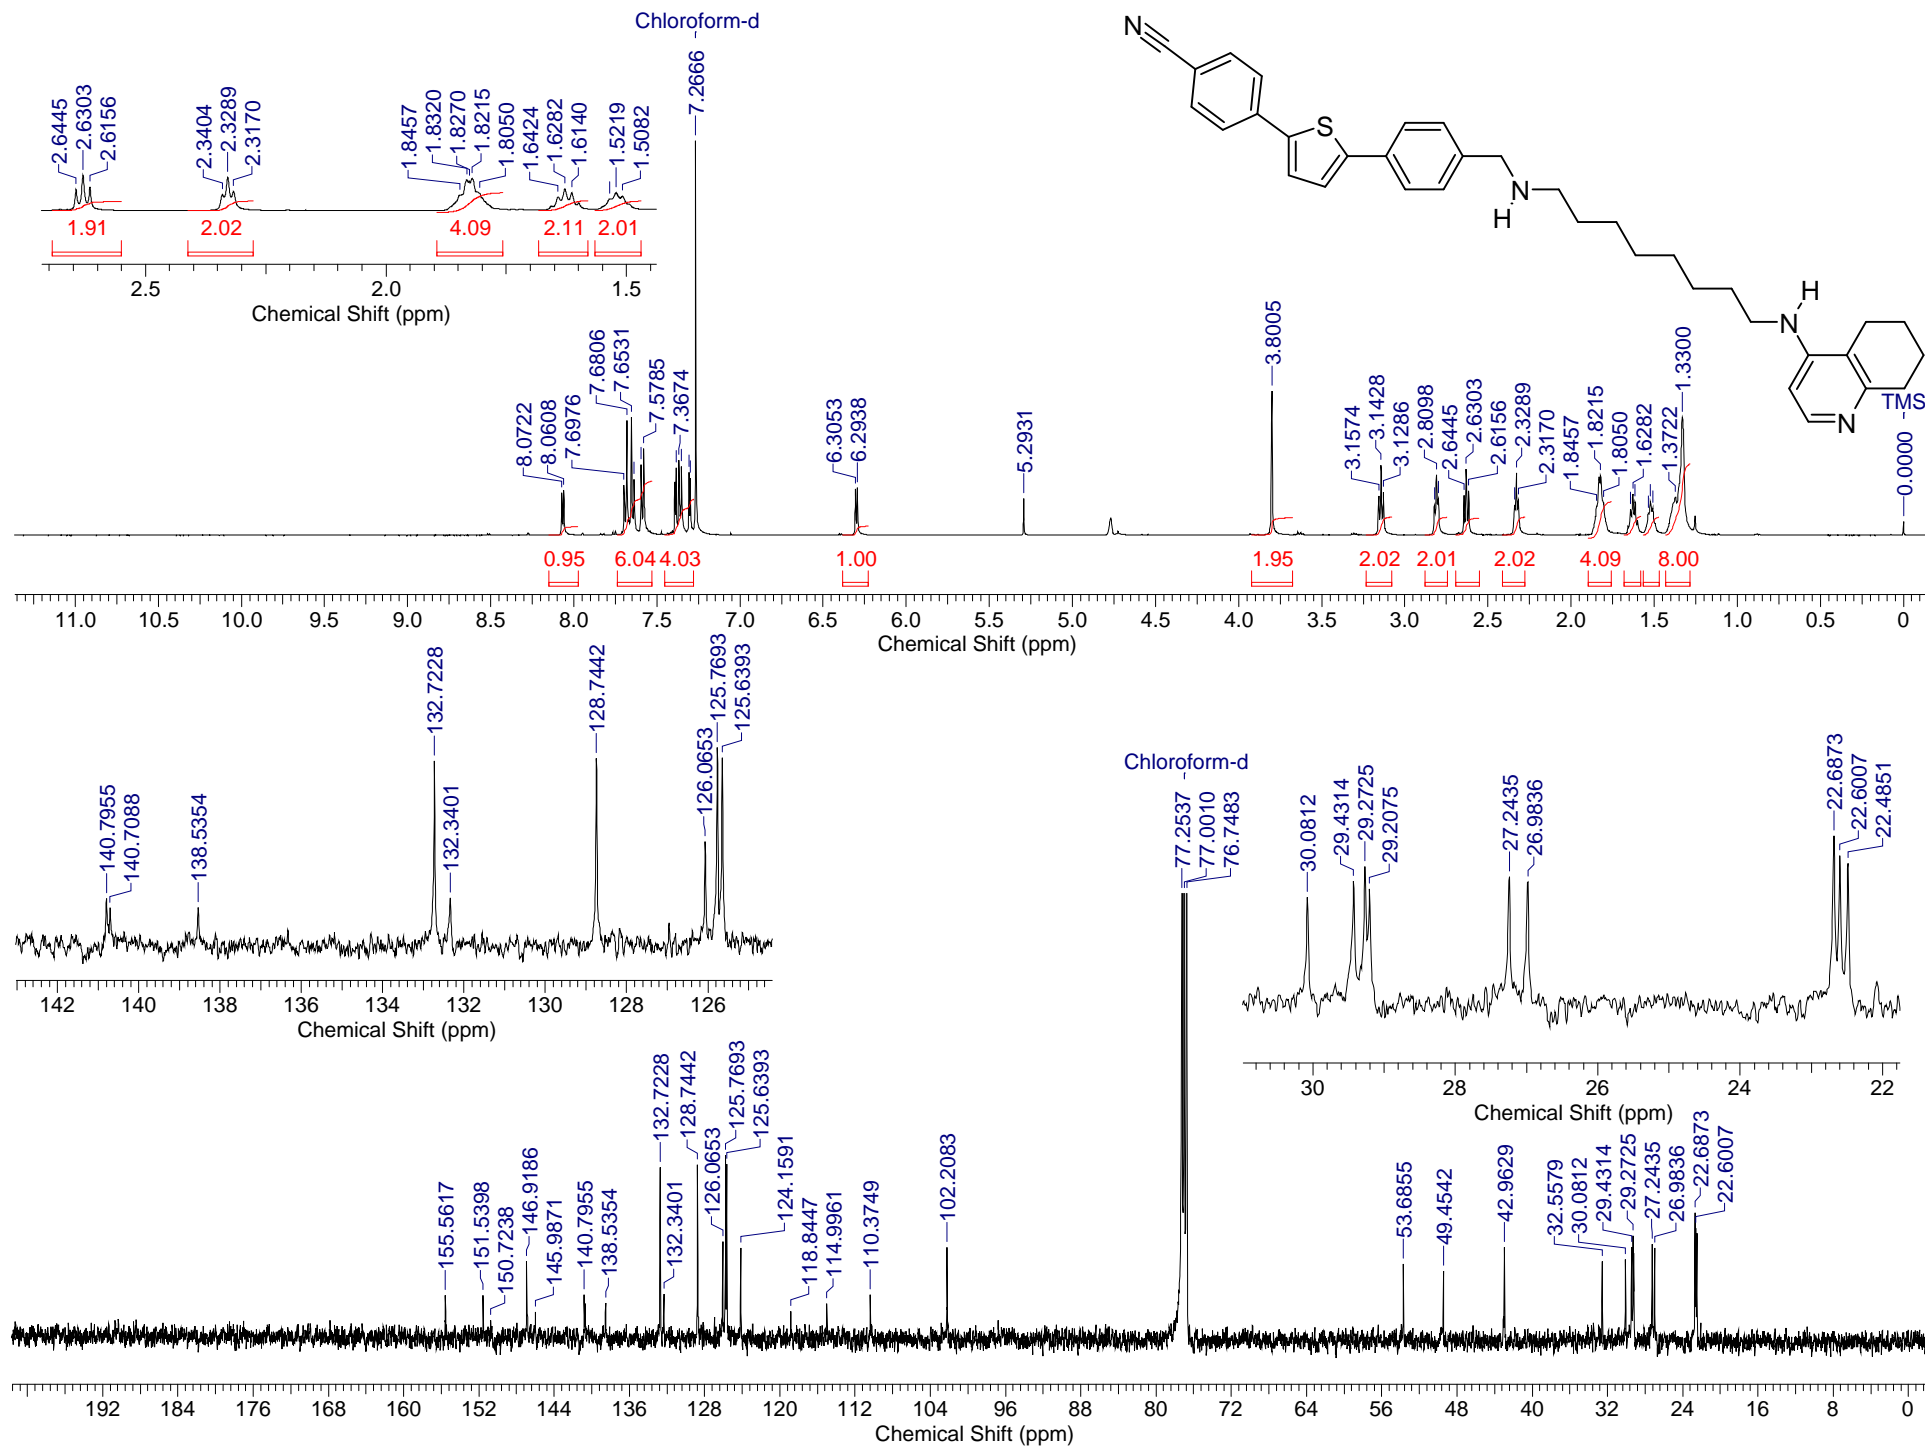

4-{5-[4-({methyl[8-(5,6,7,8-tetrahydroquinolin-4-ylamino)octyl]amino}methyl)phenyl]-2-thienyl}benzonitrile (25)

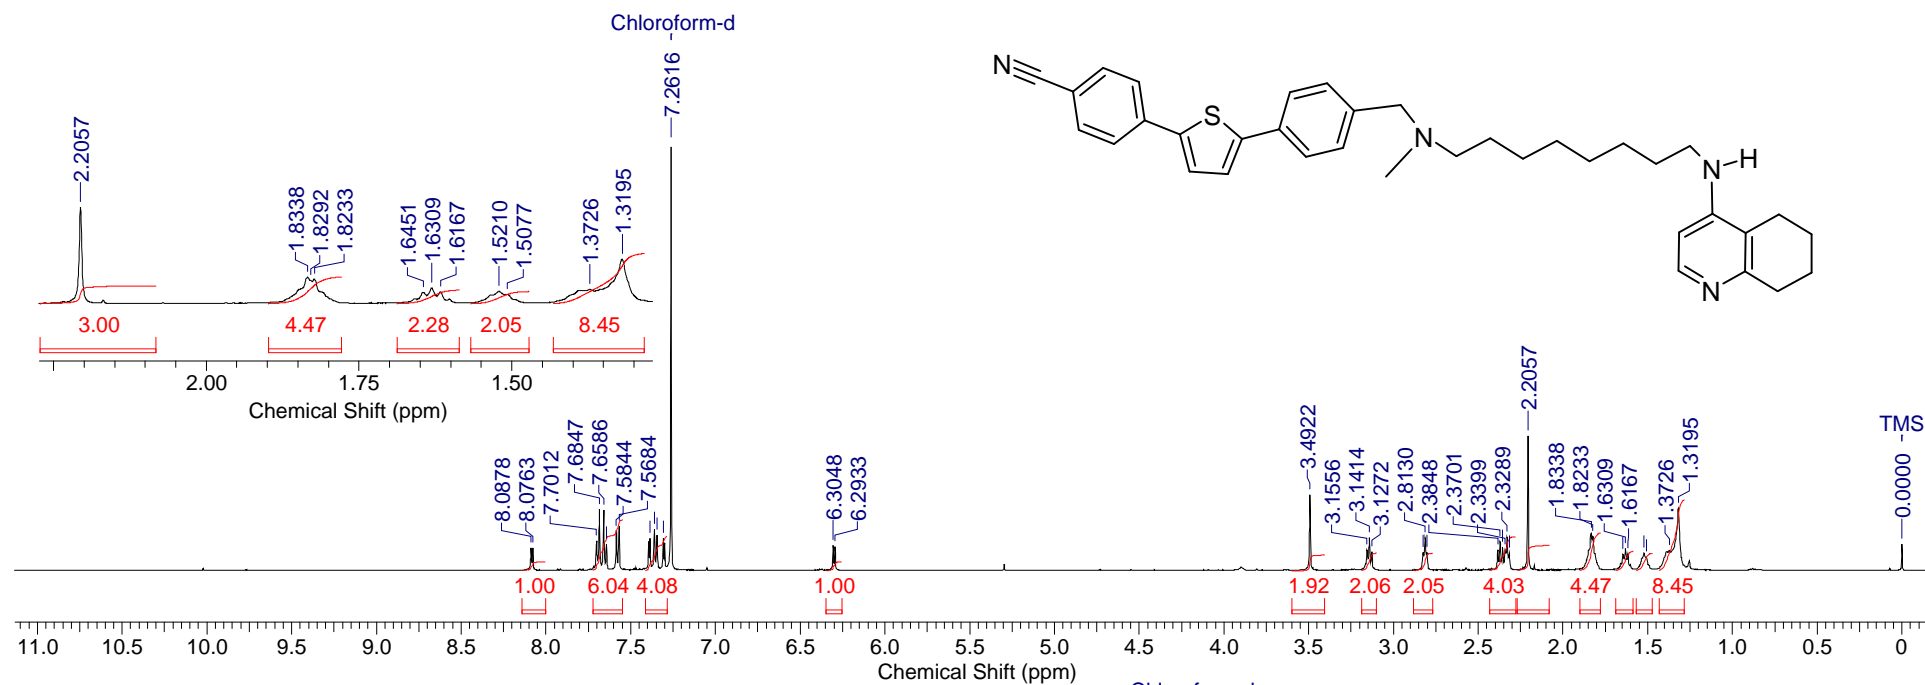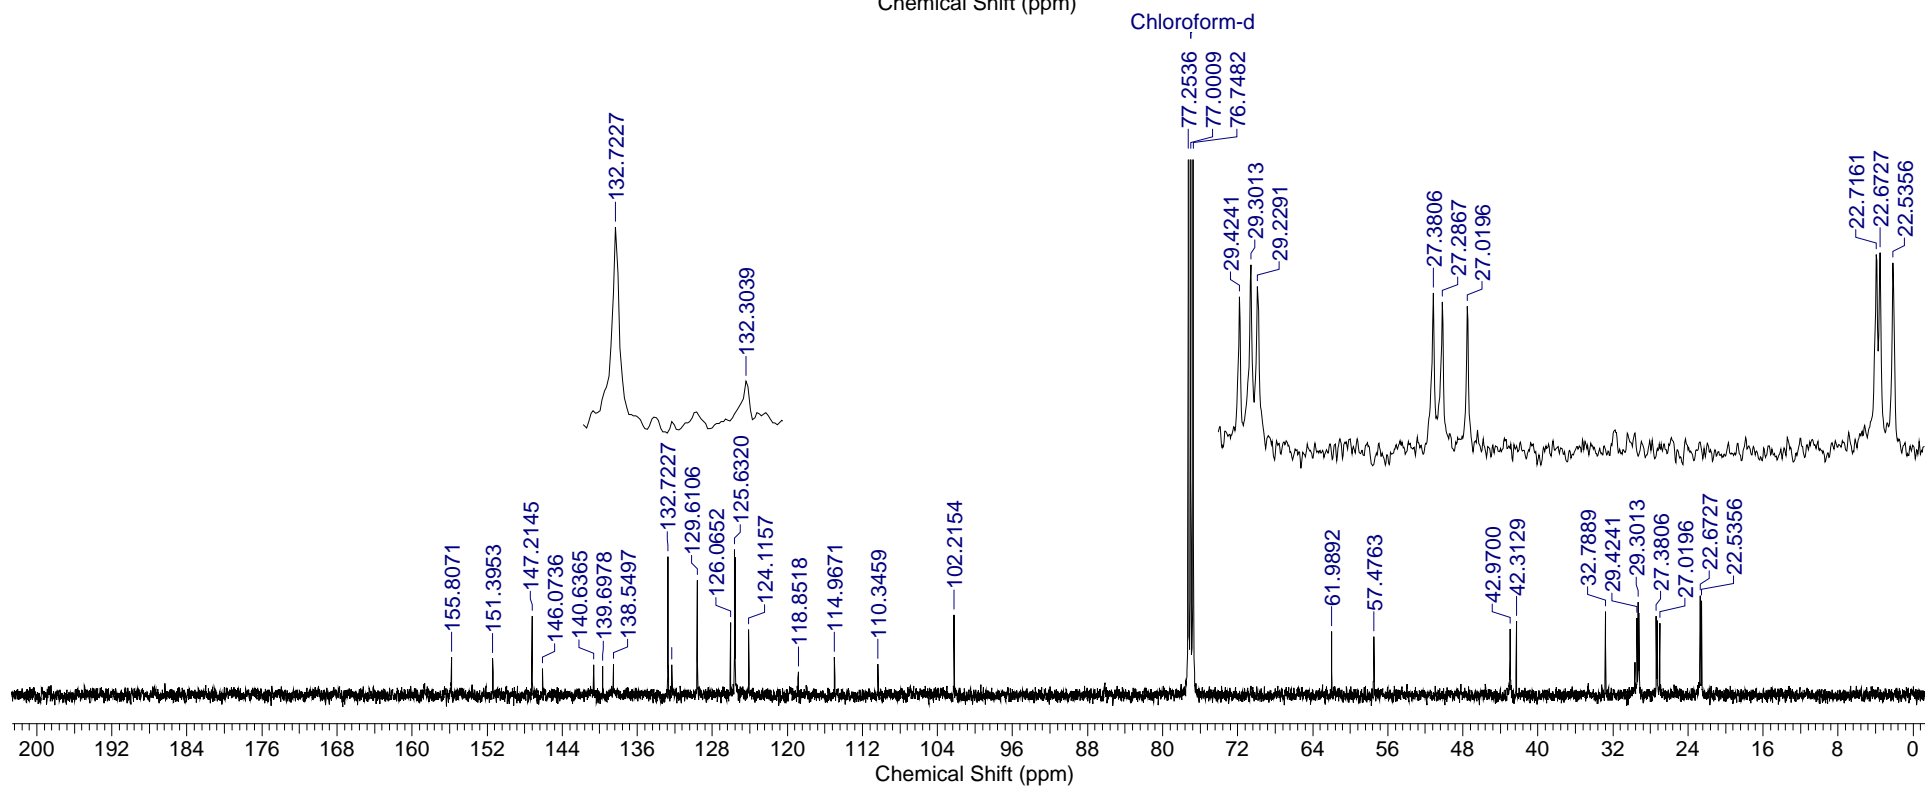



## **HPLC analyses for purity**

## Compound: 1

### Method A

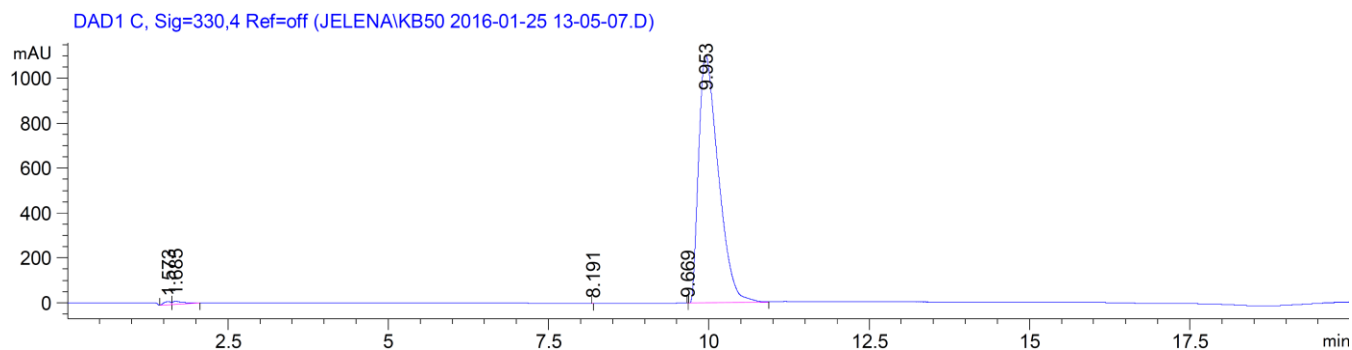

Signal 3: DAD1 C, Sig=330,4 Ref=off

| Peak # | RetTime [min] | Type | Width [min] | Area [mAU*s] | Height [mAU] | Area %   |
|--------|---------------|------|-------------|--------------|--------------|----------|
| 1      | 1.573         | BV   | 0.1036      | 105.40859    | 13.96111     | 0.4439   |
| 2      | 1.685         | VB   | 0.1366      | 152.66585    | 14.41371     | 0.6430   |
| 3      | 8.191         | BB   | 0.0147      | 5.69913e-2   | 5.70250e-2   | 2.400e-4 |
| 4      | 9.669         | BB   | 0.0107      | 4.45698e-2   | 6.36685e-2   | 1.877e-4 |
| 5      | 9.953         | BV   | 0.2998      | 2.34859e4    | 1103.46313   | 98.9127  |

Totals : 2.37441e4 1131.95866

### Method B

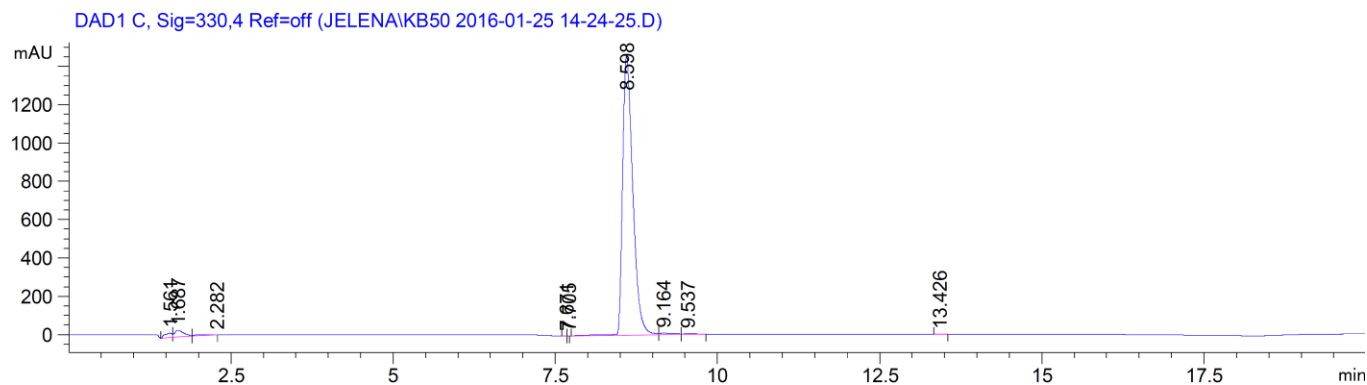

Signal 2: DAD1 C, Sig=330,4 Ref=off

| Peak # | RetTime [min] | Type | Width [min] | Area [mAU*s] | Height [mAU] | Area %   |
|--------|---------------|------|-------------|--------------|--------------|----------|
| 1      | 1.561         | BV   | 0.1057      | 184.85255    | 23.14280     | 1.1092   |
| 2      | 1.687         | VV   | 0.1447      | 348.73328    | 34.72594     | 2.0926   |
| 3      | 2.282         | VB   | 3.8846      | 76.79463     | 2.30754e-1   | 0.4608   |
| 4      | 7.671         | BV   | 0.0482      | 7.93518e-1   | 2.00216e-1   | 4.762e-3 |
| 5      | 7.705         | VB   | 0.0262      | 2.14119e-1   | 1.05508e-1   | 1.285e-3 |
| 6      | 8.598         | BV   | 0.1665      | 1.59055e4    | 1454.88940   | 95.4426  |
| 7      | 9.164         | VV   | 0.1729      | 111.48343    | 7.58695      | 0.6690   |
| 8      | 9.537         | VB   | 0.1611      | 33.36453     | 2.46150      | 0.2002   |
| 9      | 13.426        | VB   | 0.0739      | 3.25362      | 5.24656e-1   | 0.0195   |

Totals : 1.66650e4 1523.86772

## Compound: 2

### Method A

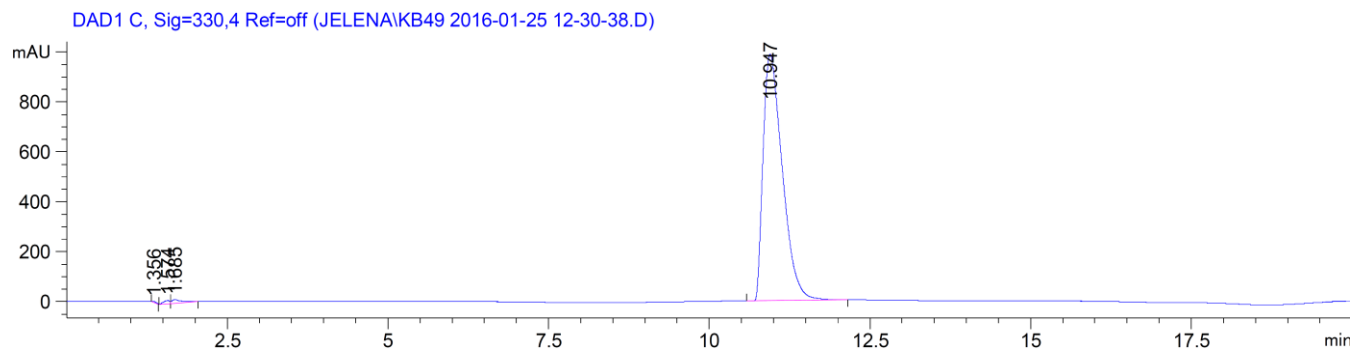

Signal 3: DAD1 C, Sig=330,4 Ref=off

| Peak # | RetTime [min] | Type | Width [min] | Area [mAU*s] | Height [mAU] | Area %  |
|--------|---------------|------|-------------|--------------|--------------|---------|
| 1      | 1.356         | BB   | 0.0762      | 17.26062     | 3.28890      | 0.0830  |
| 2      | 1.574         | BV   | 0.0928      | 88.62122     | 12.80265     | 0.4264  |
| 3      | 1.685         | VB   | 0.1320      | 154.20041    | 15.25146     | 0.7419  |
| 4      | 10.947        | VB   | 0.2979      | 2.05254e4    | 987.72833    | 98.7487 |

Totals : 2.07855e4 1019.07135

### Method B

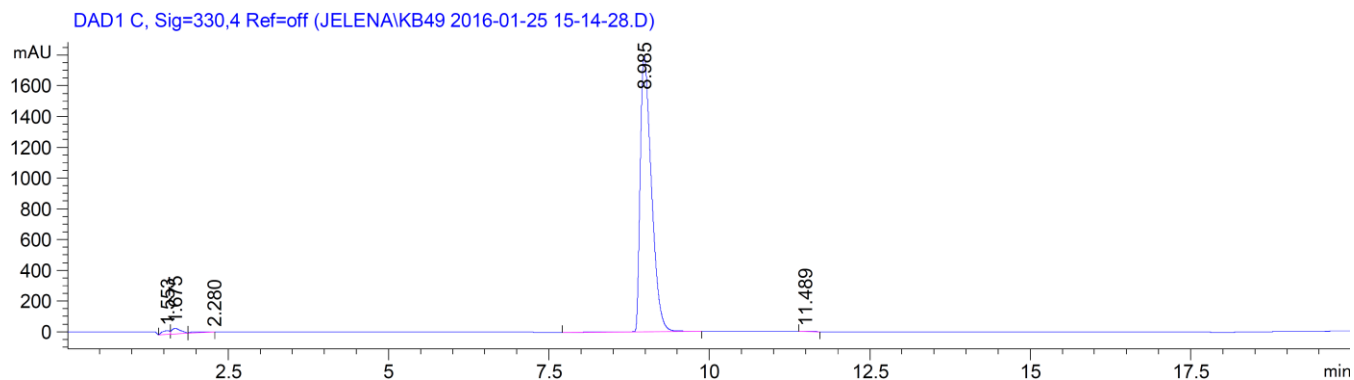

Signal 2: DAD1 C, Sig=330,4 Ref=off

| Peak # | RetTime [min] | Type | Width [min] | Area [mAU*s] | Height [mAU] | Area %  |
|--------|---------------|------|-------------|--------------|--------------|---------|
| 1      | 1.553         | BV   | 0.1005      | 178.95872    | 23.71483     | 0.7923  |
| 2      | 1.675         | VV   | 0.1382      | 339.58795    | 35.47026     | 1.5035  |
| 3      | 2.280         | VB   | 3.6902      | 89.92261     | 2.84483e-1   | 0.3981  |
| 4      | 8.985         | BV   | 0.1792      | 2.19726e4    | 1796.24792   | 97.2827 |
| 5      | 11.489        | VB   | 0.1091      | 5.25767      | 5.75538e-1   | 0.0233  |

Totals : 2.25863e4 1856.29304

## Compound: 3

### Method A

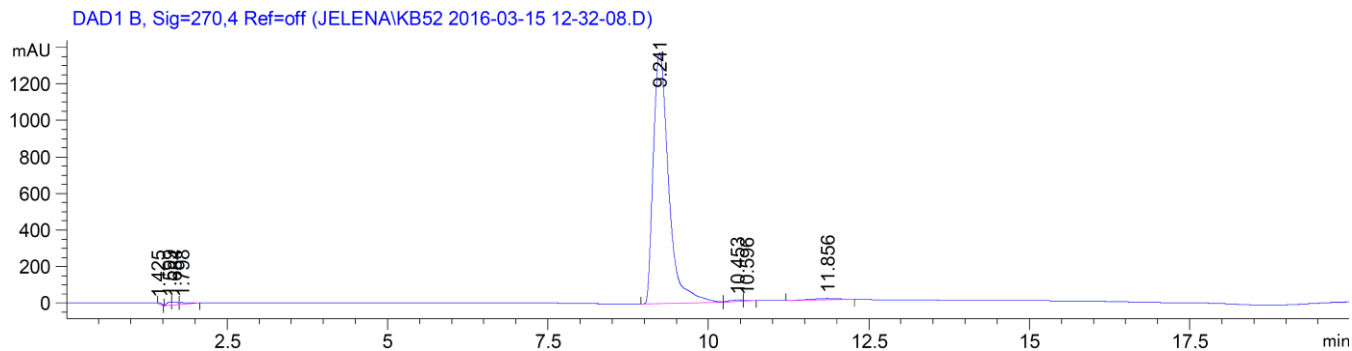

Signal 2: DAD1 B, Sig=270,4 Ref=off

| Peak # | RetTime [min] | Type | Width [min] | Area [mAU*s] | Height [mAU] | Area %  |
|--------|---------------|------|-------------|--------------|--------------|---------|
| 1      | 1.425         | VB   | 0.0797      | 28.13734     | 4.19775      | 0.1199  |
| 2      | 1.599         | BV   | 0.0751      | 80.66073     | 16.92988     | 0.3437  |
| 3      | 1.684         | VV   | 0.0831      | 98.39760     | 15.49618     | 0.4193  |
| 4      | 1.798         | VB   | 0.1281      | 109.27438    | 10.40016     | 0.4656  |
| 5      | 9.241         | BB   | 0.2547      | 2.28007e4    | 1373.25891   | 97.1549 |
| 6      | 10.453        | BV   | 0.1554      | 95.82644     | 7.43150      | 0.4083  |
| 7      | 10.596        | VB   | 0.0894      | 25.37045     | 3.48489      | 0.1081  |
| 8      | 11.856        | BB   | 0.3464      | 230.03264    | 7.79287      | 0.9802  |

Totals : 2.34684e4 1438.99214

### Method B

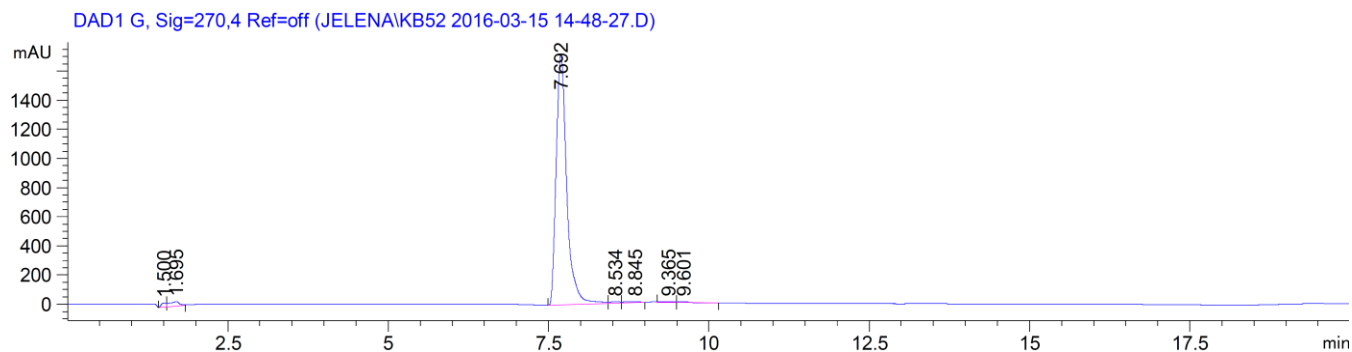

Signal 3: DAD1 G, Sig=270,4 Ref=off

| Peak # | RetTime [min] | Type | Width [min] | Area [mAU*s] | Height [mAU] | Area %  |
|--------|---------------|------|-------------|--------------|--------------|---------|
| 1      | 1.500         | BV   | 0.0828      | 144.21815    | 27.90996     | 0.6996  |
| 2      | 1.695         | VV   | 0.1525      | 339.94757    | 29.60406     | 1.6490  |
| 3      | 7.692         | BV   | 0.1750      | 1.97402e4    | 1718.59253   | 95.7563 |
| 4      | 8.534         | VV   | 0.1318      | 111.12260    | 9.99130      | 0.5390  |
| 5      | 8.845         | VB   | 0.2075      | 105.68089    | 5.99840      | 0.5126  |
| 6      | 9.365         | VV   | 0.1728      | 80.66315     | 5.50875      | 0.3913  |
| 7      | 9.601         | VB   | 0.1474      | 93.21310     | 7.55732      | 0.4522  |

Totals : 2.06151e4 1805.16232

## Compound: 4

### Method A

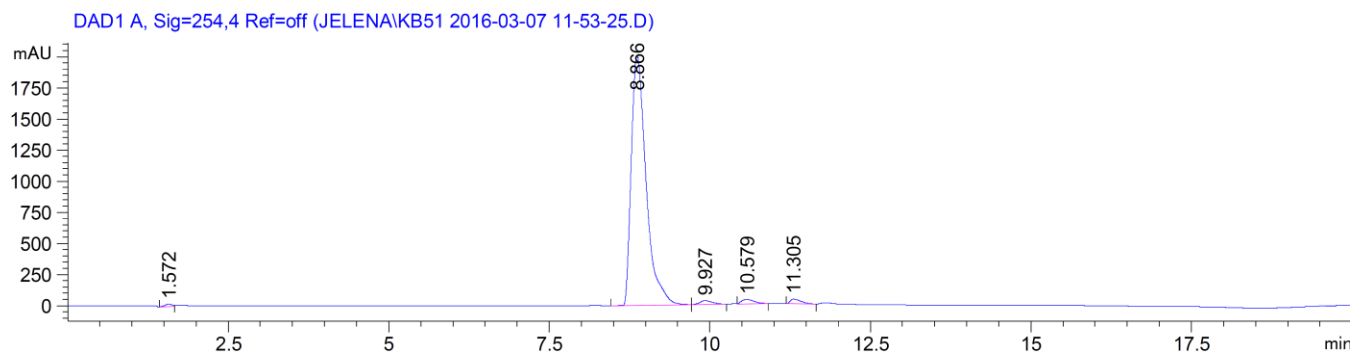

Signal 1: DAD1 A, Sig=254,4 Ref=off

| Peak # | RetTime [min] | Type | Width [min] | Area [mAU*s] | Height [mAU] | Area %  |
|--------|---------------|------|-------------|--------------|--------------|---------|
| 1      | 1.572         | BV   | 0.1081      | 173.18770    | 22.18152     | 0.5128  |
| 2      | 8.866         | BV   | 0.2139      | 3.22791e4    | 2010.08569   | 95.5675 |
| 3      | 9.927         | VB   | 0.1748      | 431.68842    | 30.36716     | 1.2781  |
| 4      | 10.579        | VB   | 0.1694      | 464.05820    | 35.06033     | 1.3739  |
| 5      | 11.305        | BB   | 0.1598      | 428.19977    | 37.19765     | 1.2678  |

Totals : 3.37762e4 2134.89236

### Method B

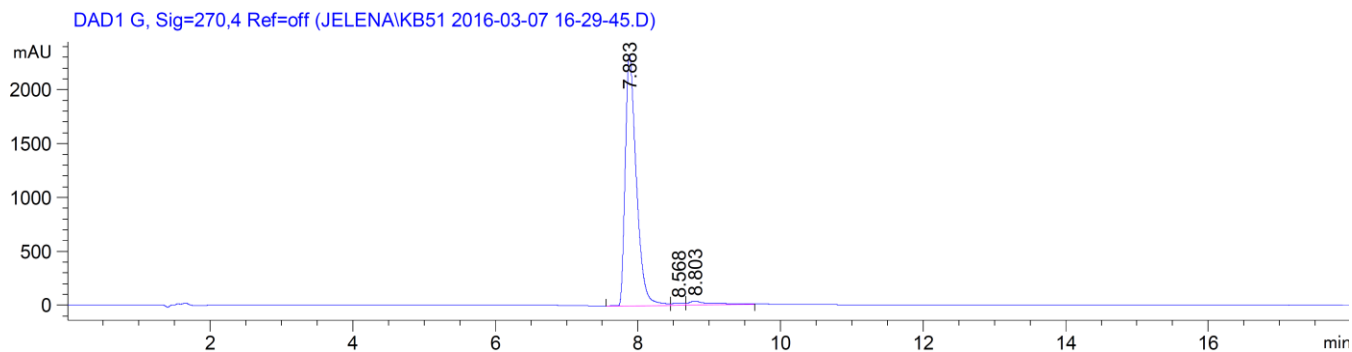

Signal 3: DAD1 G, Sig=270,4 Ref=off

| Peak # | RetTime [min] | Type | Width [min] | Area [mAU*s] | Height [mAU] | Area %  |
|--------|---------------|------|-------------|--------------|--------------|---------|
| 1      | 7.883         | BV   | 0.1291      | 2.51235e4    | 2333.72437   | 95.5612 |
| 2      | 8.568         | VV   | 0.1407      | 242.59225    | 20.32733     | 0.9227  |
| 3      | 8.803         | VV   | 0.3236      | 924.39185    | 35.64532     | 3.5161  |

Totals : 2.62905e4 2389.69701

## Compound: 5

### Method A

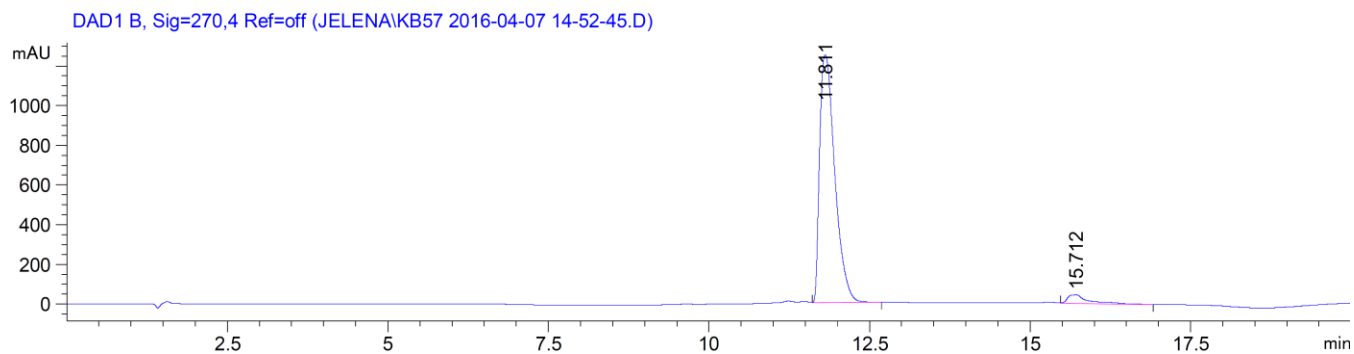

Signal 2: DAD1 B, Sig=270,4 Ref=off

| Peak # | RetTime [min] | Type | Width [min] | Area [mAU*s] | Height [mAU] | Area %  |
|--------|---------------|------|-------------|--------------|--------------|---------|
| 1      | 11.811        | VB   | 0.2465      | 2.05500e4    | 1248.69263   | 95.5095 |
| 2      | 15.712        | VB   | 0.2762      | 966.18292    | 43.83290     | 4.4905  |

Totals : 2.15162e4 1292.52553

### Method B

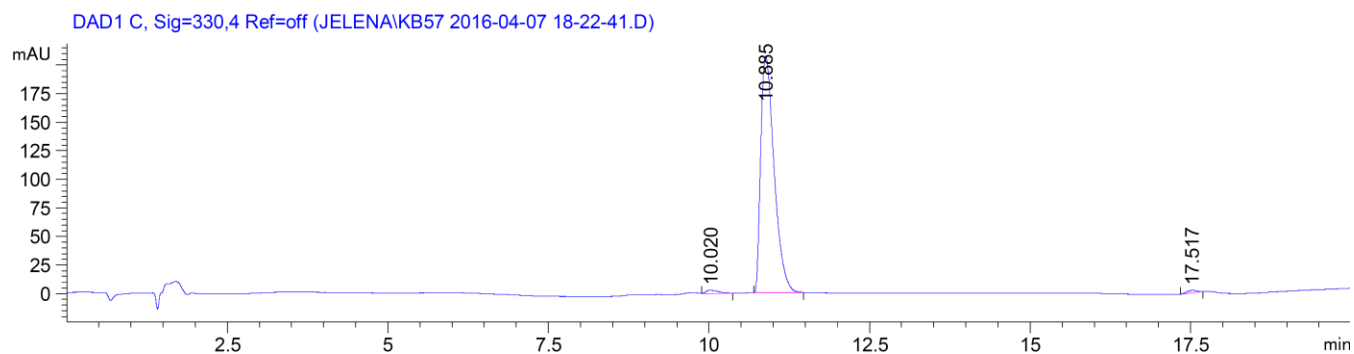

Signal 2: DAD1 C, Sig=330,4 Ref=off

| Peak # | RetTime [min] | Type | Width [min] | Area [mAU*s] | Height [mAU] | Area %  |
|--------|---------------|------|-------------|--------------|--------------|---------|
| 1      | 10.020        | VB   | 0.1620      | 42.47963     | 3.15679      | 1.3850  |
| 2      | 10.885        | BB   | 0.2165      | 3001.71289   | 207.20801    | 97.8644 |
| 3      | 17.517        | BB   | 0.1214      | 23.02526     | 2.24897      | 0.7507  |

Totals : 3067.21778 212.61377

## Compound: 6

### Method A

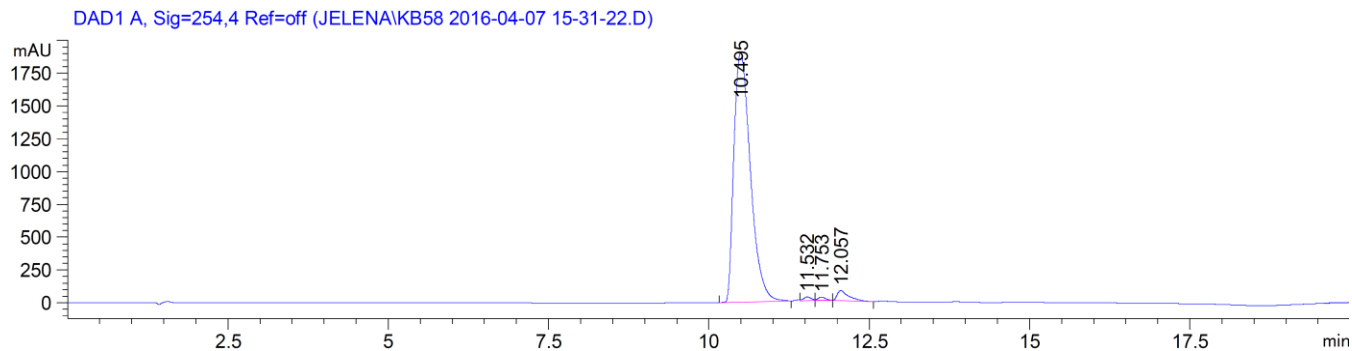

Signal 1: DAD1 A, Sig=254,4 Ref=off

| Peak # | RetTime [min] | Type | Width [min] | Area [mAU*s] | Height [mAU] | Area %  |
|--------|---------------|------|-------------|--------------|--------------|---------|
| 1      | 10.495        | BB   | 0.2137      | 3.40220e4    | 1902.29553   | 96.0275 |
| 2      | 11.532        | VV   | 0.1148      | 240.47559    | 27.96380     | 0.6787  |
| 3      | 11.753        | VB   | 0.1193      | 207.88483    | 25.17498     | 0.5868  |
| 4      | 12.057        | BB   | 0.1772      | 959.07672    | 76.53194     | 2.7070  |

Totals : 3.54294e4 2031.96626

### Method B

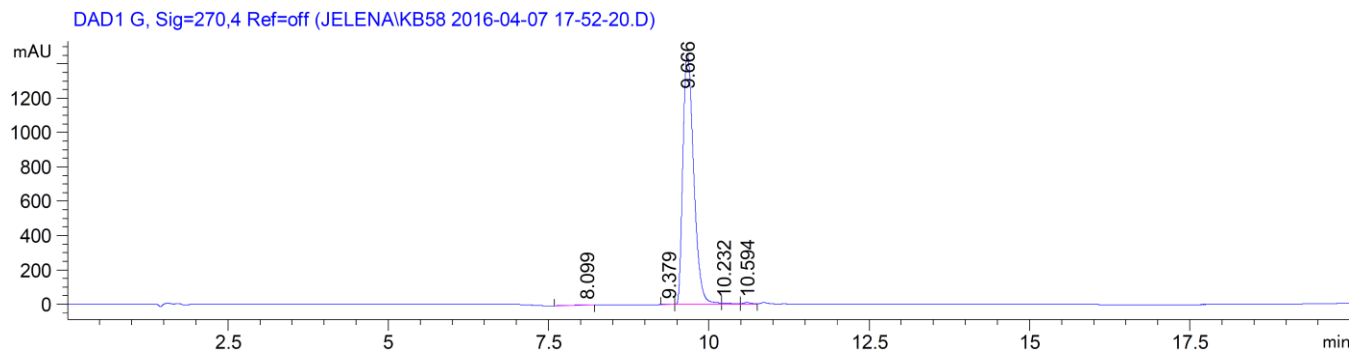

Signal 3: DAD1 G, Sig=270,4 Ref=off

| Peak # | RetTime [min] | Type | Width [min] | Area [mAU*s] | Height [mAU] | Area %  |
|--------|---------------|------|-------------|--------------|--------------|---------|
| 1      | 8.099         | BV   | 0.3515      | 40.44973     | 1.35017      | 0.2329  |
| 2      | 9.379         | VB   | 0.0824      | 8.81246      | 1.29542      | 0.0507  |
| 3      | 9.666         | BV   | 0.1809      | 1.71276e4    | 1459.74524   | 98.6289 |
| 4      | 10.232        | VV   | 0.1388      | 94.94499     | 8.09829      | 0.5467  |
| 5      | 10.594        | VV   | 0.1184      | 93.89258     | 9.45137      | 0.5407  |

Totals : 1.73657e4 1479.94048

## Compound: 10

### Method A

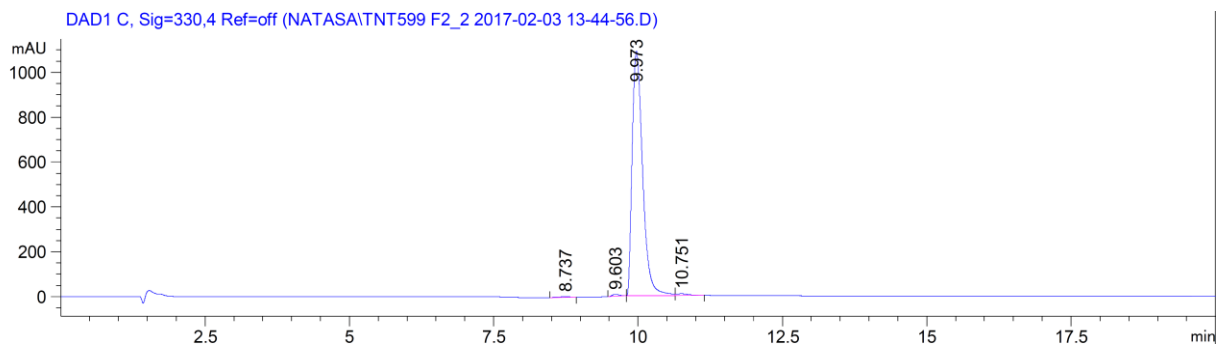

Signal 2: DAD1 C, Sig=330,4 Ref=off

| Peak # | RetTime [min] | Type | Width [min] | Area [mAU*s] | Height [mAU] | Area %  |
|--------|---------------|------|-------------|--------------|--------------|---------|
| 1      | 8.737         | BV   | 0.1365      | 40.78170     | 3.53764      | 0.2911  |
| 2      | 9.603         | BB   | 0.1154      | 84.12697     | 9.09872      | 0.6006  |
| 3      | 9.973         | BV   | 0.1964      | 1.37720e4    | 1089.88208   | 98.3134 |
| 4      | 10.751        | VV   | 0.1651      | 111.35114    | 7.96709      | 0.7949  |

Totals : 1.40083e4 1110.48554

### Method B

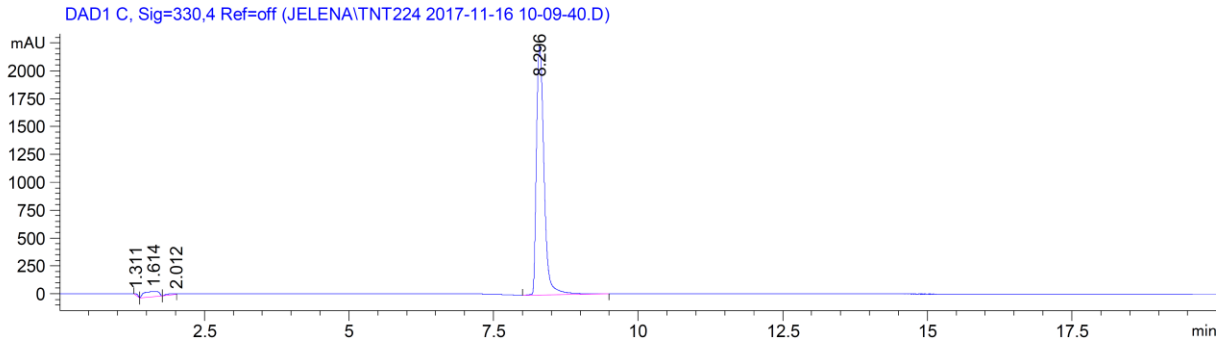

Signal 2: DAD1 C, Sig=330,4 Ref=off

| Peak # | RetTime [min] | Type | Width [min] | Area [mAU*s] | Height [mAU] | Area %  |
|--------|---------------|------|-------------|--------------|--------------|---------|
| 1      | 1.311         | BB   | 0.0792      | 49.82119     | 9.34718      | 0.2319  |
| 2      | 1.614         | BB   | 0.2088      | 841.34064    | 47.57282     | 3.9170  |
| 3      | 2.012         | BV   | 0.2952      | 114.31578    | 4.57146      | 0.5322  |
| 4      | 8.296         | BB   | 0.1421      | 2.04739e4    | 2230.87305   | 95.3189 |

Totals : 2.14793e4 2292.36451



## Compound: 15

### Method C

DAD1 B, Sig=330,4 Ref=off (JELENA\SEKV 6 JELENA MEOH 2014-01-15 10-35-06\TEST0000006.D)

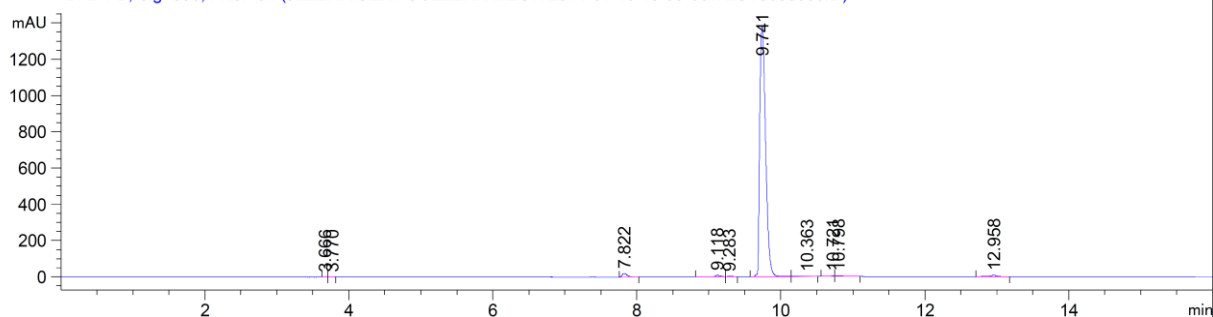

Signal 2: DAD1 B, Sig=330,4 Ref=off

| Peak # | RetTime [min] | Type | Width [min] | Area [mAU*s] | Height [mAU] | Area %  |
|--------|---------------|------|-------------|--------------|--------------|---------|
| 1      | 3.666         | VV   | 0.0499      | 5.86679      | 1.61452      | 0.0725  |
| 2      | 3.770         | VV   | 0.0615      | 6.42468      | 1.46846      | 0.0794  |
| 3      | 7.822         | BB   | 0.0736      | 91.23423     | 19.33337     | 1.1270  |
| 4      | 9.118         | BV   | 0.0771      | 43.22337     | 8.24990      | 0.5339  |
| 5      | 9.283         | VV   | 0.0691      | 12.93283     | 2.44820      | 0.1598  |
| 6      | 9.741         | BV   | 0.0899      | 7817.75244   | 1383.93896   | 96.5682 |
| 7      | 10.363        | VB   | 0.0935      | 14.27669     | 1.80958      | 0.1764  |
| 8      | 10.721        | BV   | 0.0606      | 14.11273     | 3.25163      | 0.1743  |
| 9      | 10.798        | VB   | 0.0923      | 39.79552     | 5.57518      | 0.4916  |
| 10     | 12.958        | BB   | 0.0878      | 49.95594     | 7.73735      | 0.6171  |

Totals : 8095.57523 1435.42716

### Method D

DAD1 A, Sig=254,4 Ref=off (JELENA\JK59 2014-01-29 12-24-19.D)

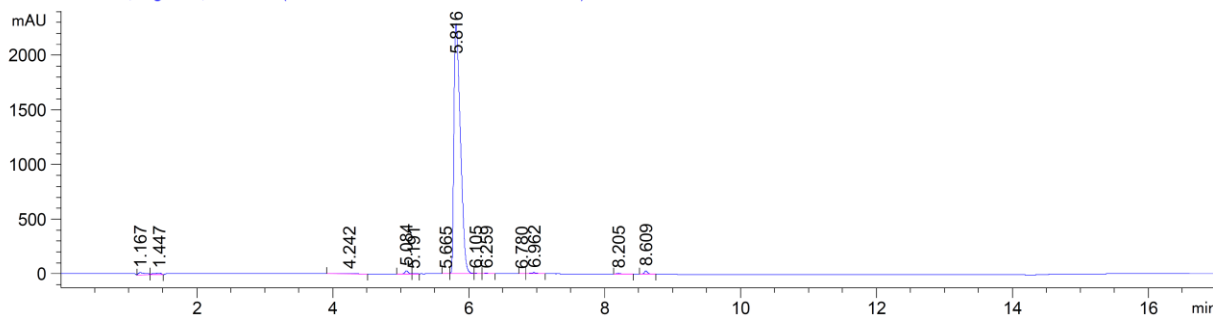

Signal 1: DAD1 A, Sig=254,4 Ref=off

| Peak # | RetTime [min] | Type | Width [min] | Area [mAU*s] | Height [mAU] | Area %  |
|--------|---------------|------|-------------|--------------|--------------|---------|
| 1      | 1.167         | BV   | 0.1030      | 153.61269    | 20.72488     | 0.9738  |
| 2      | 1.447         | VB   | 0.1062      | 122.89980    | 13.82392     | 0.7791  |
| 3      | 4.242         | BB   | 0.1556      | 56.76239     | 4.64547      | 0.3598  |
| 4      | 5.084         | BV   | 0.0498      | 90.18621     | 27.49329     | 0.5717  |
| 5      | 5.191         | VV   | 0.0515      | 6.70909      | 1.58050      | 0.0425  |
| 6      | 5.665         | BV   | 0.0465      | 5.10729      | 1.61156      | 0.0324  |
| 7      | 5.816         | VV   | 0.1028      | 1.50860e4    | 2290.39307   | 95.6341 |
| 8      | 6.105         | VV   | 0.0573      | 18.89536     | 4.61160      | 0.1198  |
| 9      | 6.259         | VB   | 0.0505      | 23.72610     | 7.00373      | 0.1504  |
| 10     | 6.780         | VV   | 0.0526      | 8.14344      | 2.31199      | 0.0516  |
| 11     | 6.962         | VB   | 0.1128      | 72.58609     | 9.32257      | 0.4601  |
| 12     | 8.205         | VB   | 0.0589      | 26.87801     | 6.97987      | 0.1704  |
| 13     | 8.609         | VB   | 0.0545      | 103.20499    | 29.03672     | 0.6542  |

Totals : 1.57747e4 2419.53917

## Compound: 21

### Method A

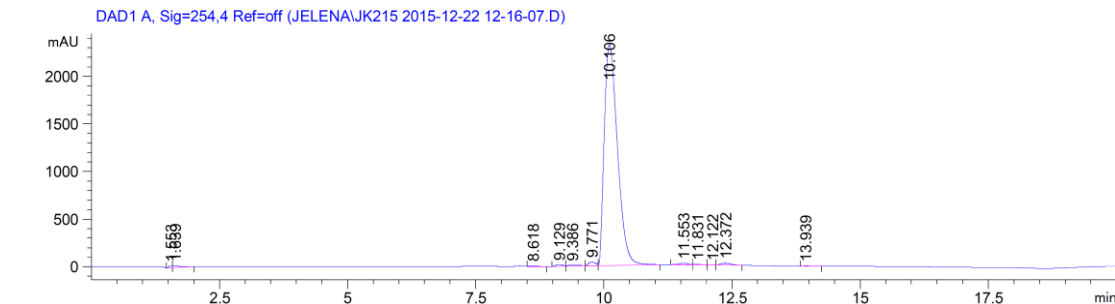

Signal 1: DAD1 A, Sig=254,4 Ref=off

| Peak # | RetTime [min] | Type | Width [min] | Area [mAU*s] | Height [mAU] | Area %  |
|--------|---------------|------|-------------|--------------|--------------|---------|
| 1      | 1.553         | BV   | 0.0776      | 91.92958     | 18.79401     | 0.2130  |
| 2      | 1.639         | VB   | 0.1344      | 198.15492    | 19.69478     | 0.4591  |
| 3      | 8.618         | VB   | 0.1283      | 111.68575    | 11.30480     | 0.2587  |
| 4      | 9.129         | BV   | 0.1354      | 174.10493    | 16.66947     | 0.4033  |
| 5      | 9.386         | VB   | 0.1657      | 145.31332    | 10.35561     | 0.3366  |
| 6      | 9.771         | BV   | 0.1552      | 355.89175    | 36.51839     | 0.8245  |
| 7      | 10.106        | VB   | 0.2107      | 4.14863e4    | 2319.59961   | 96.1112 |
| 8      | 11.553        | VV   | 0.1670      | 213.49384    | 16.01798     | 0.4946  |
| 9      | 11.831        | VB   | 0.1244      | 47.32322     | 4.58520      | 0.1096  |
| 10     | 12.122        | BV   | 0.0835      | 16.24580     | 2.32430      | 0.0376  |
| 11     | 12.372        | VB   | 0.1667      | 292.75635    | 21.06087     | 0.6782  |
| 12     | 13.939        | BB   | 0.1293      | 31.70451     | 3.01281      | 0.0734  |

Totals : 4.31649e4 2479.93781

### Method B

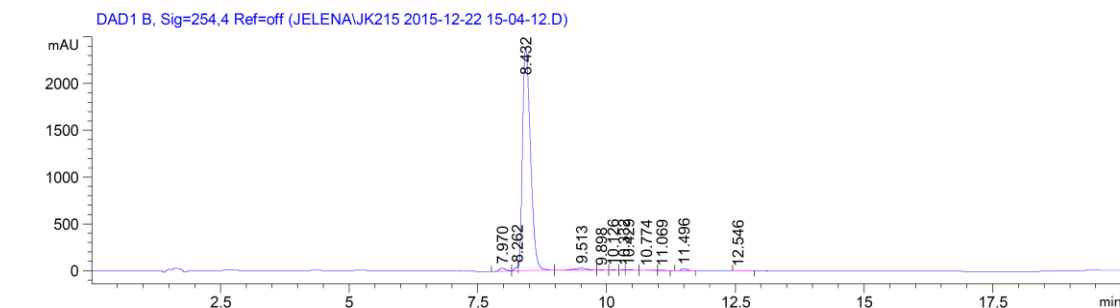

Signal 1: DAD1 B, Sig=254,4 Ref=off

| Peak # | RetTime [min] | Type | Width [min] | Area [mAU*s] | Height [mAU] | Area %  |
|--------|---------------|------|-------------|--------------|--------------|---------|
| 1      | 7.970         | BV   | 0.1311      | 279.44455    | 32.74783     | 1.0427  |
| 2      | 8.262         | VV   | 0.0693      | 176.40025    | 40.87649     | 0.6582  |
| 3      | 8.432         | VB   | 0.1655      | 2.56459e4    | 2383.74829   | 95.6892 |
| 4      | 9.513         | BV   | 0.2027      | 347.04858    | 21.80587     | 1.2949  |
| 5      | 9.898         | VB   | 0.0984      | 16.29854     | 2.05749      | 0.0608  |
| 6      | 10.126        | BV   | 0.0821      | 16.34438     | 2.36577      | 0.0610  |
| 7      | 10.332        | VV   | 0.0655      | 22.35339     | 4.87294      | 0.0834  |
| 8      | 10.429        | VV   | 0.1072      | 61.95589     | 7.24741      | 0.2312  |
| 9      | 10.774        | VV   | 0.1491      | 39.22920     | 3.11046      | 0.1464  |
| 10     | 11.069        | VB   | 0.0946      | 14.12029     | 1.81806      | 0.0527  |
| 11     | 11.496        | BB   | 0.1218      | 160.73245    | 21.35513     | 0.5997  |
| 12     | 12.546        | BB   | 0.1077      | 21.43447     | 2.42209      | 0.0800  |

Totals : 2.68013e4 2524.42784

## Compound: 22

### Method A

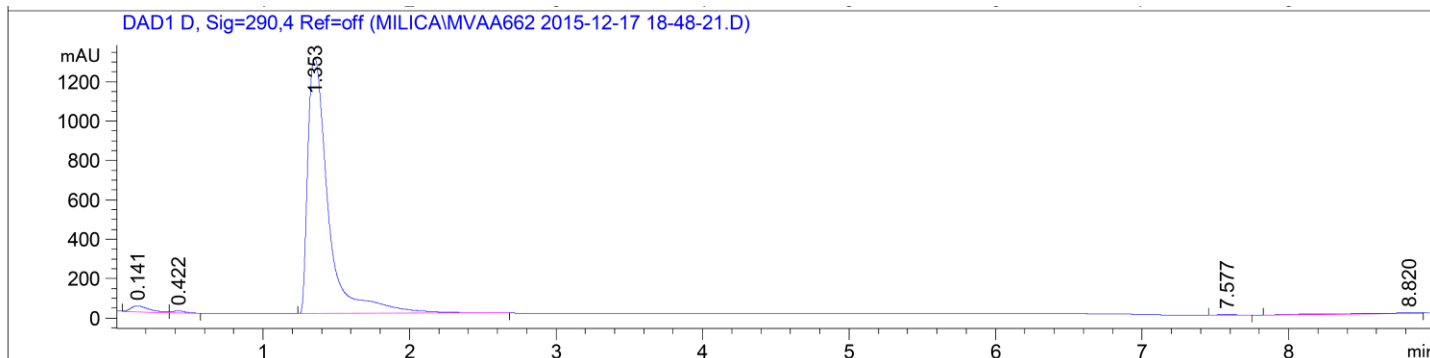

Signal 4: DAD1 D, Sig=290,4 Ref=off

| Peak # | RetTime [min] | Type | Width [min] | Area [mAU*s] | Height [mAU] | Area %  |
|--------|---------------|------|-------------|--------------|--------------|---------|
| 1      | 0.141         | VV   | 0.1171      | 247.75066    | 29.47381     | 1.8894  |
| 2      | 0.422         | VB   | 0.0820      | 55.16560     | 9.61117      | 0.4207  |
| 3      | 1.353         | BB   | 0.1484      | 1.26743e4    | 1298.76404   | 96.6572 |
| 4      | 7.577         | BB   | 0.1037      | 21.18176     | 2.44210      | 0.1615  |
| 5      | 8.820         | BV   | 0.6545      | 114.23597    | 2.04417      | 0.8712  |

Totals : 1.31126e4 1342.33529

### Method E

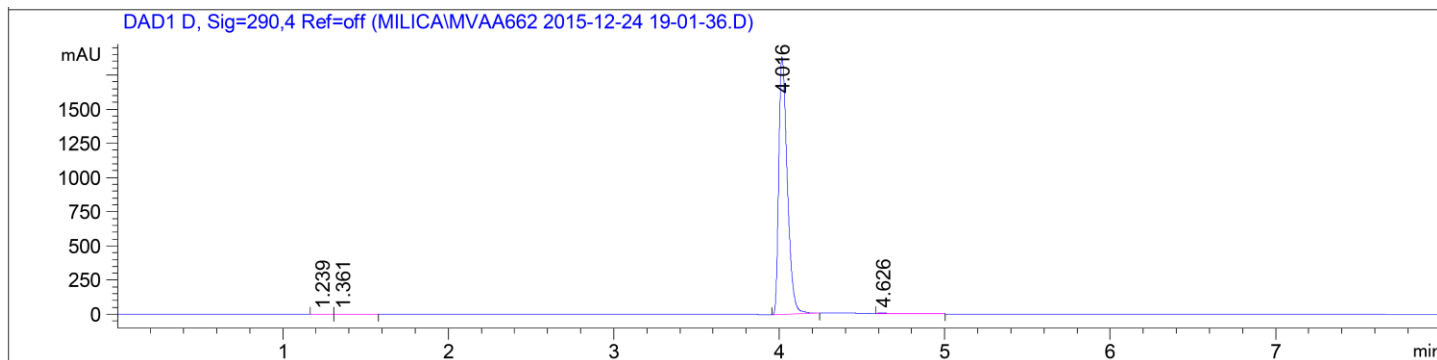

Signal 4: DAD1 D, Sig=290,4 Ref=off

| Peak # | RetTime [min] | Type | Width [min] | Area [mAU*s] | Height [mAU] | Area %  |
|--------|---------------|------|-------------|--------------|--------------|---------|
| 1      | 1.239         | VV   | 0.0671      | 10.42186     | 1.86773      | 0.1533  |
| 2      | 1.361         | VB   | 0.0689      | 17.28675     | 3.08195      | 0.2542  |
| 3      | 4.016         | BV   | 0.0543      | 6759.96680   | 1885.48987   | 99.4120 |
| 4      | 4.626         | VB   | 0.0886      | 12.27417     | 1.66243      | 0.1805  |

Totals : 6799.94957 1892.10197

## Compound: 23

### Method A

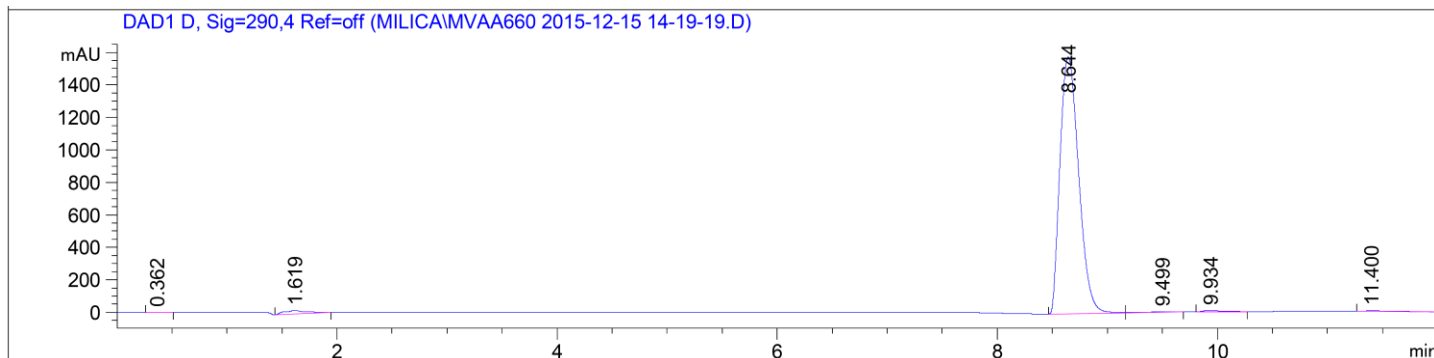

Signal 4: DAD1 D, Sig=290,4 Ref=off

| Peak # | RetTime [min] | Type | Width [min] | Area [mAU*s] | Height [mAU] | Area %  |
|--------|---------------|------|-------------|--------------|--------------|---------|
| 1      | 0.362         | BB   | 0.0787      | 7.39480      | 1.11772      | 0.0387  |
| 2      | 1.619         | BB   | 0.1825      | 307.33722    | 21.53188     | 1.6077  |
| 3      | 8.644         | BV   | 0.1402      | 1.85912e4    | 1581.15515   | 97.2543 |
| 4      | 9.499         | VV   | 0.1675      | 55.64240     | 3.95747      | 0.2911  |
| 5      | 9.934         | BB   | 0.1335      | 90.59611     | 8.09747      | 0.4739  |
| 6      | 11.400        | BBA  | 0.1606      | 63.90107     | 4.73127      | 0.3343  |

Totals : 1.91160e4 1620.59096

### Method E

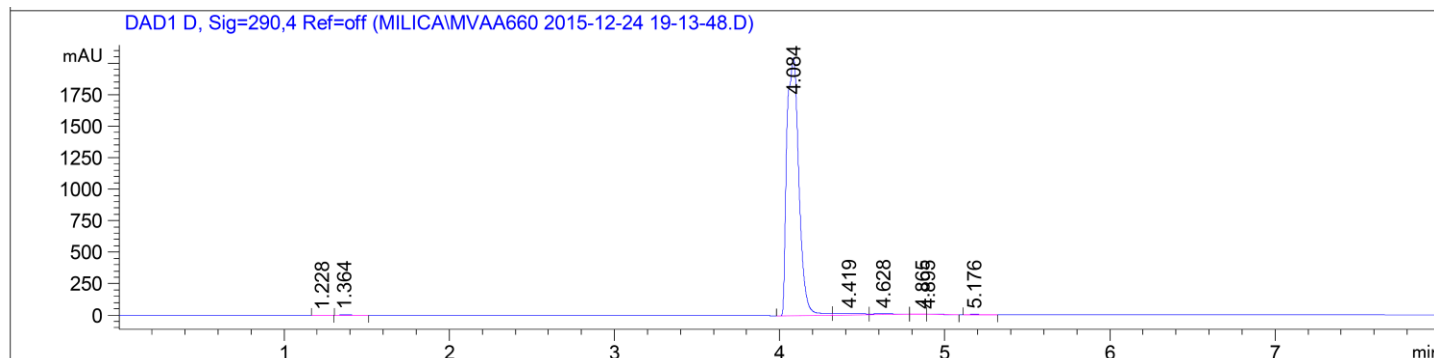

Signal 4: DAD1 D, Sig=290,4 Ref=off

| Peak # | RetTime [min] | Type | Width [min] | Area [mAU*s] | Height [mAU] | Area %  |
|--------|---------------|------|-------------|--------------|--------------|---------|
| 1      | 1.228         | VB   | 0.0712      | 10.64459     | 1.96605      | 0.0999  |
| 2      | 1.364         | BV   | 0.0846      | 17.77066     | 2.89378      | 0.1667  |
| 3      | 4.084         | BV   | 0.0690      | 1.03580e4    | 2046.91760   | 97.1763 |
| 4      | 4.419         | VV   | 0.1378      | 161.83618    | 14.11464     | 1.5183  |
| 5      | 4.628         | VB   | 0.1022      | 84.30206     | 10.55695     | 0.7909  |
| 6      | 4.865         | BV   | 0.0477      | 5.33605      | 1.34785      | 0.0501  |
| 7      | 4.895         | VB   | 0.0677      | 8.40072      | 1.49150      | 0.0788  |
| 8      | 5.176         | BB   | 0.0640      | 12.68676     | 2.42771      | 0.1190  |

Totals : 1.06590e4 2081.71608

## Compound: 24

### Method A

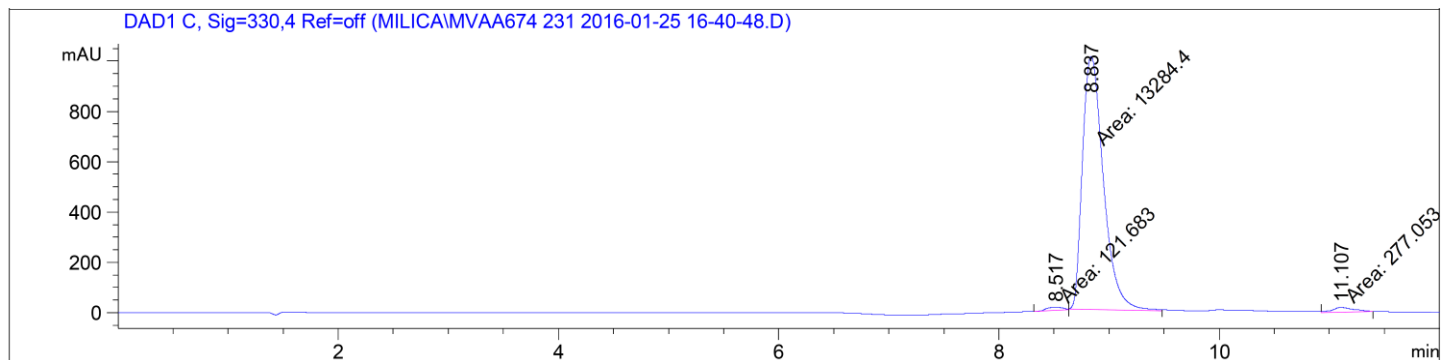

Signal 3: DAD1 C, Sig=330,4 Ref=off

| Peak # | RetTime [min] | Type | Width [min] | Area [mAU*s] | Height [mAU] | Area %  |
|--------|---------------|------|-------------|--------------|--------------|---------|
| 1      | 8.517         | MM   | 0.1654      | 121.68285    | 12.26426     | 0.8893  |
| 2      | 8.837         | MM   | 0.2204      | 1.32844e4    | 1004.56268   | 97.0859 |
| 3      | 11.107        | MM   | 0.1651      | 277.05350    | 19.78963     | 2.0248  |

Totals : 1.36831e4 1036.61658

### Method B

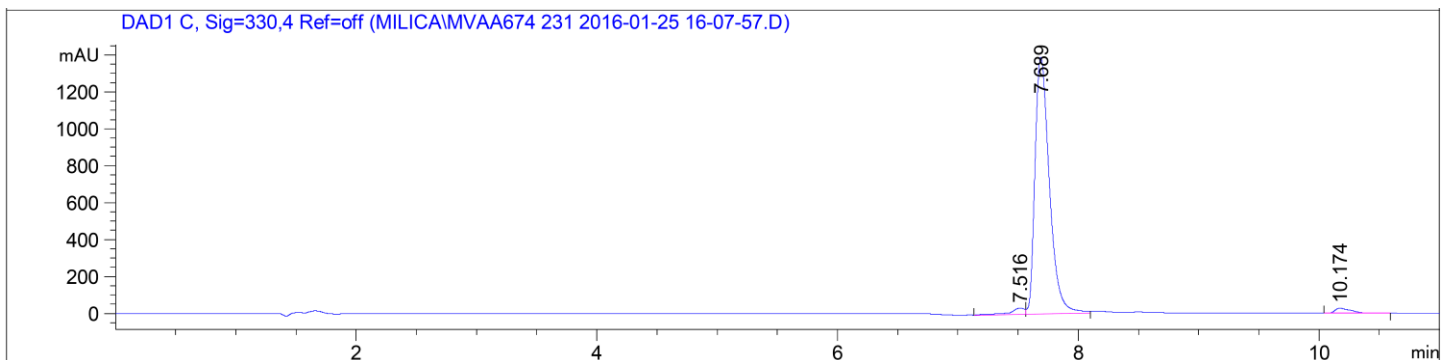

Signal 3: DAD1 C, Sig=330,4 Ref=off

| Peak # | RetTime [min] | Type | Width [min] | Area [mAU*s] | Height [mAU] | Area %  |
|--------|---------------|------|-------------|--------------|--------------|---------|
| 1      | 7.516         | BV   | 0.1245      | 288.66171    | 34.02340     | 2.3821  |
| 2      | 7.689         | VV   | 0.1286      | 1.15766e4    | 1390.29077   | 95.5321 |
| 3      | 10.174        | BB   | 0.1275      | 252.75702    | 27.42595     | 2.0858  |

Totals : 1.21180e4 1451.74013

## Compound: 25

### Method A

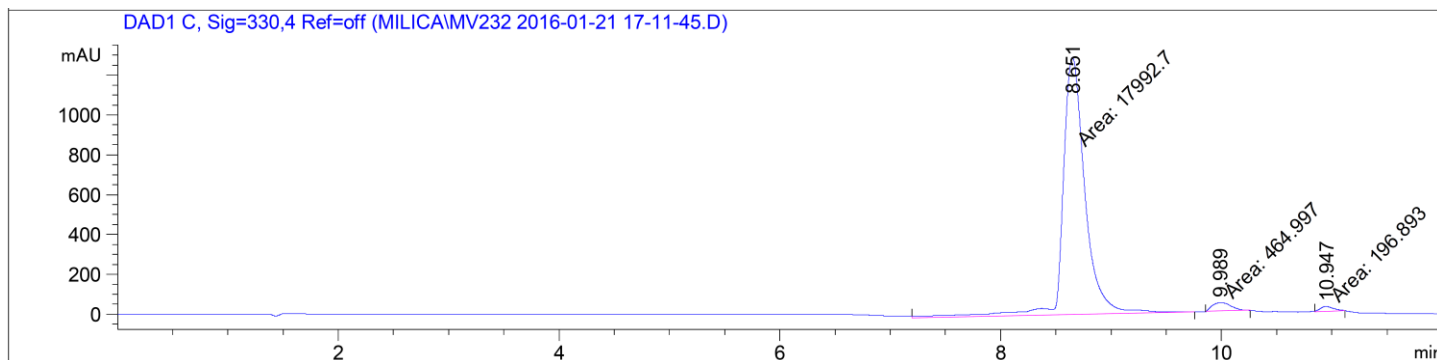

Signal 3: DAD1 C, Sig=330,4 Ref=off

| Peak # | RetTime [min] | Type | Width [min] | Area [mAU*s] | Height [mAU] | Area %  |
|--------|---------------|------|-------------|--------------|--------------|---------|
| 1      | 8.651         | MM   | 0.2323      | 1.79927e4    | 1290.94250   | 96.4519 |
| 2      | 9.989         | MM   | 0.1925      | 464.99719    | 40.25417     | 2.4927  |
| 3      | 10.947        | MM   | 0.1337      | 196.89345    | 24.54042     | 1.0555  |

Totals : 1.86546e4 1355.73710

### Method B

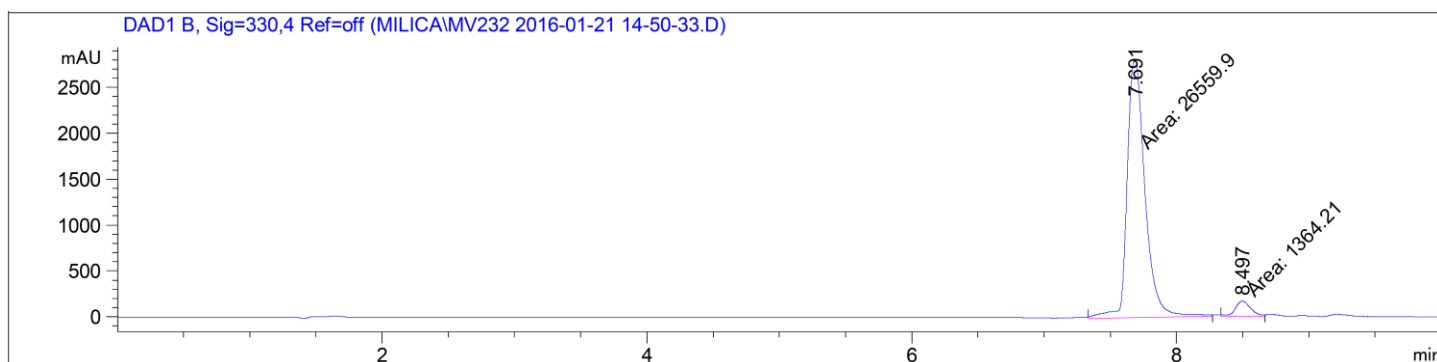

Signal 2: DAD1 B, Sig=330,4 Ref=off

| Peak # | RetTime [min] | Type | Width [min] | Area [mAU*s] | Height [mAU] | Area %  |
|--------|---------------|------|-------------|--------------|--------------|---------|
| 1      | 7.691         | MM   | 0.1576      | 2.65599e4    | 2808.66309   | 95.1146 |
| 2      | 8.497         | MM   | 0.1368      | 1364.21326   | 166.19298    | 4.8854  |

Totals : 2.79241e4 2974.85606
